# Supplementary material for: FeCl3-catalyzed oxidative amidation of benzylic C–H bonds enabled by a photogenerated chlorine-radical
Source: Royal Society of Chemistry journal article supplement (doi:10.1039/d3cc03186a), 2023-01-01
Supplement: d3cc03186a1.pdf [file d3cc03186a1.pdf]

## Support Information

# FeCl<sub>3</sub>-Catalyzed Oxidative Amidation of Benzylic C–H bonds Enabled by Photogenerated Chlorine-Radical

Yingying Yang,<sup>a</sup> Xianglin Yu,<sup>a</sup> Na He,<sup>a</sup> Xinxiang Huang,<sup>a</sup> Xizhong Song,<sup>\*b</sup> Jingbo Chen,<sup>\*a</sup> Jun Lin<sup>\*a</sup> and Yi Jin<sup>\*a,b</sup>

<sup>a</sup> Key Laboratory of Medicinal Chemistry for Natural Resource, Ministry of Education; Yunnan Provincial Center for Research & Development of Natural Products; School of Chemical Science and Technology, Yunnan University, Kunming, 650091, P. R. China.

<sup>b</sup> Jianxi Zhiheng Hall Chinese Herbal Medicine Co. Ltd., Jianxi, 331200, P. R. China

\* Corresponding author. Tel./fax: +86-871-65031633. E-mail: 51967249@qq.com (X. Song); chenjb@ynu.edu.cn (J. Chen) linjun@ynu.edu.cn (J. Lin); jinyi@ynu.edu.cn (Y. Jin).

## Contents

|                                                                                                                                        |      |
|----------------------------------------------------------------------------------------------------------------------------------------|------|
| 1 General information .....                                                                                                            | S3   |
| 2 Synthesis of Substrates <b>4</b> .....                                                                                               | S5   |
| 3 Procedure for preparing compounds <b>3a-3y</b> , <b>5a-5t</b> , <b>6a-6c</b> and <b>7a-7n</b> . .....                                | S8   |
| 4 Spectroscopic Data of <b>3a-3y</b> , <b>5a-5t</b> , <b>6a-6c</b> , <b>7a-7n</b> and <b>9</b> . .....                                 | S9   |
| 5 Control experiments .....                                                                                                            | S35  |
| 6 <sup>1</sup> H NMR and <sup>13</sup> C NMR Spectra of <b>3a-3y</b> , <b>5a-5t</b> , <b>6a-6c</b> , <b>7a-7n</b> and <b>9</b> . ..... | S40  |
| 7 References .....                                                                                                                     | S109 |

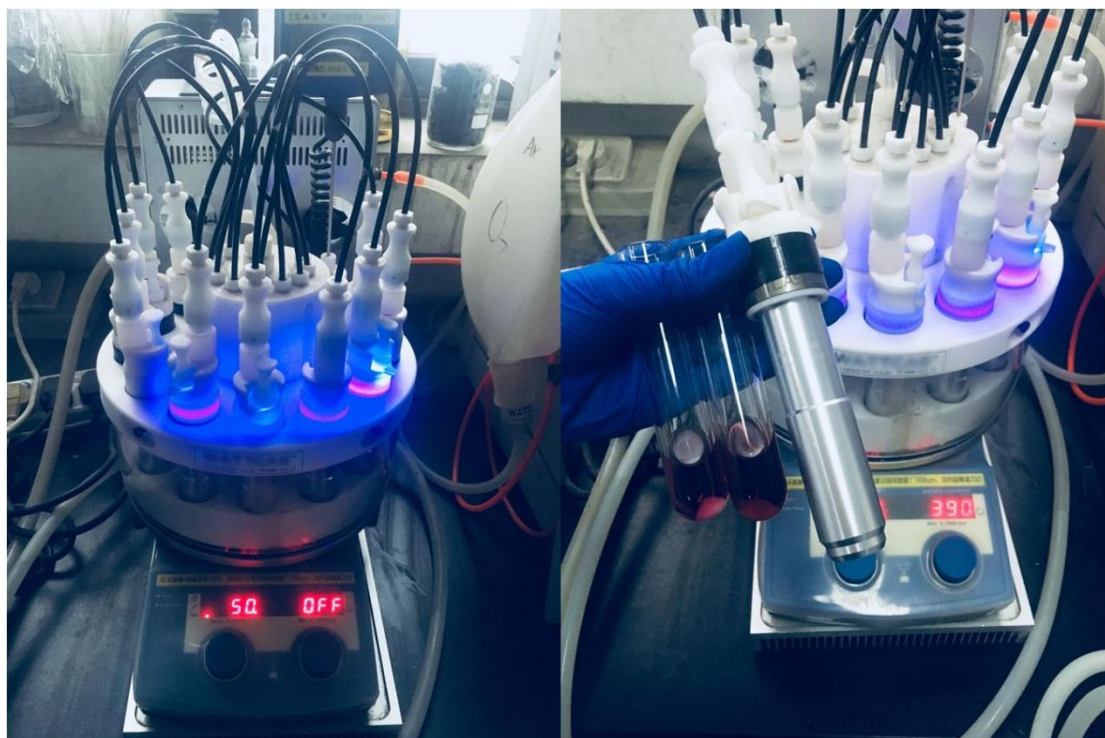

Figure S1. Details for the photochemical reaction setup.

The light Source and the Material of the Irradiation Vessel

Manufacturer: Xi'an WATTECS experimental equipment Co. Ltd

Model: WP-TEC-1020SL

Broadband source:  $\lambda = 390$  nm (light power: 16 W).

Material of the irradiation vessel: borosilicate reaction tube (20 ml)

Distance from the light source to the irradiation vessel: 2.0 cm

Not use any filters

## 1 General information

All chemicals and reagents were used of commercial grade and were used without further purification. The reactions were monitored by thin-layer chromatography (TLC) using silica gel GF254. Column chromatography was performed with 200–300 mesh silica gel. All yields refer to isolated products after purification. The intermediates and the products synthesized were fully characterized by spectroscopic data. The NMR spectra were recorded on Bruker DRX-400 ( $^1\text{H}$ : 400 MHz,  $^{13}\text{C}$ : 101MHz) using  $\text{CDCl}_3$  and  $\text{DMSO-d}_6$  as solvents. The following abbreviation were used to explain the multiplicities: (s) = singlet, (d) = doublet, (t) = triplet, (q) = quartet, (sept) = septuplet, (dd) = double doublet, (dt) = double triplet, (dq) = double quartet, (ddd) = double-double doublet, (m) = multiplet; Chemical shifts ( $\delta$ ) are expressed in parts per million (ppm) and J values are given in hertz (Hz). IR spectra were recorded on an FT-IR Thermo Nicolet Avatar 360 using a KBr pellet. HRMS was performed on an Agilent LC/MSD TOF instrument. The melting points were measured by the XT-4A melting point apparatus without correction.

**Table 1S.** Optimization Study for benzylic C-H amidation<sup>a,b</sup>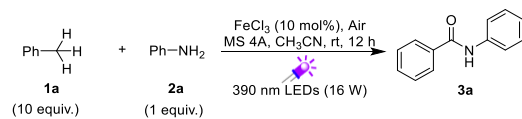

| entry | deviation from standard conditions                                                    | yield (%) |
|-------|---------------------------------------------------------------------------------------|-----------|
| 1     | none                                                                                  | 71        |
| 2     | CuCl as catalyst                                                                      | 40        |
| 3     | Fe <sub>2</sub> (SO <sub>4</sub> ) <sub>3</sub> , or Cu(OAc) <sub>2</sub> as catalyst | trace     |
| 4     | Fe <sub>2</sub> (SO <sub>4</sub> ) <sub>3</sub> + LiCl (10 mol %)                     | 42        |
| 5     | under O <sub>2</sub>                                                                  | 73        |
| 6     | K <sub>2</sub> S <sub>2</sub> O <sub>8</sub> as oxidant                               | 12        |
| 7     | NaIO <sub>4</sub> as oxidant                                                          | trace     |
| 8     | DCM, or 1,2-dichloroethane as solvent                                                 | < 5       |
| 9     | THF as solvent                                                                        | 40        |
| 10    | 5.0 equiv of methylene <b>1a</b>                                                      | 41        |
| 11    | 440 nm LED                                                                            | 36        |
| 12    | 50 °C                                                                                 | 65        |
| 13    | no 4A molecular sieve                                                                 | 67        |
| 14    | no FeCl <sub>3</sub>                                                                  | N.D.      |
| 15    | under N <sub>2</sub>                                                                  | trace     |
| 16    | in the dark                                                                           | N.D.      |

[a] Reaction conditions: **1a** (3.0 mmol, 10.0 equiv), **2a** (0.3 mmol, 1.0 equiv), FeCl<sub>3</sub> (0.03 mmol, 10 mol %) in CH<sub>3</sub>CN (3.0 mL, 0.1 M) and in the presence of 4A molecular sieves under air atmosphere, room temperature, 390 nm light-emitting diodes (LEDs, 16W). [b] Yields are of isolated products after chromatographic purification based on **2a**.



## 2 Synthesis of Substrates 4

### 2.1 General Procedures for the Synthesis of Substrates 4a-4l<sup>1</sup>

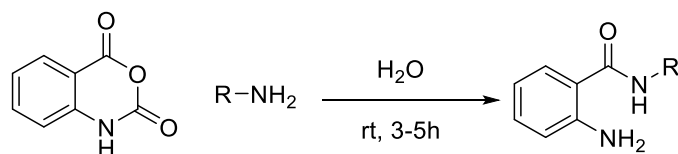

Under air atmosphere, Isatoic anhydride (5.0 mmol, 1.0 equiv) and alkyl amines (5.0 mmol, 1.0 equiv) were added to H<sub>2</sub>O (20.0 mL) and the mixture was stirred reaction tube. The mixture was stirred at room temperature and monitored by TLC. After stirring for 3-5 h. After the reaction was quenched with saturated NaCl solution and extracted with 20 mL EtOAc for three times. The organic layers were combined, dried over Na<sub>2</sub>SO<sub>4</sub>, filtered and evaporated under reduced pressure. The residues were purified by flash column chromatography on silica gel to provide the Substrates 4a-4l.

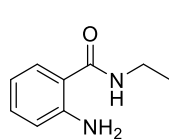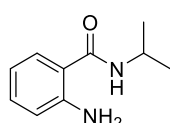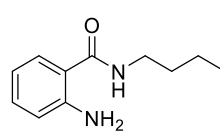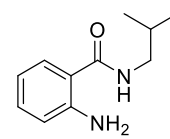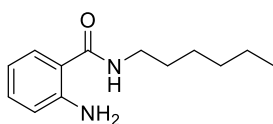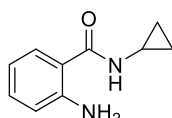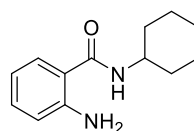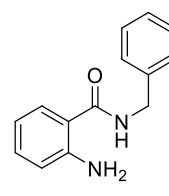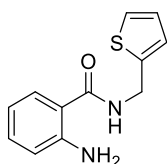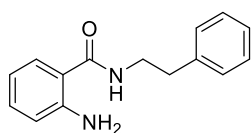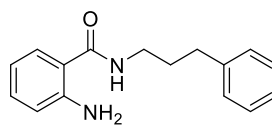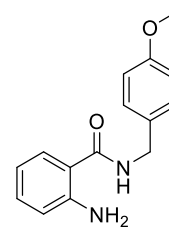

## 2.2 Synthesis of substrates **4m-4n**<sup>1</sup>

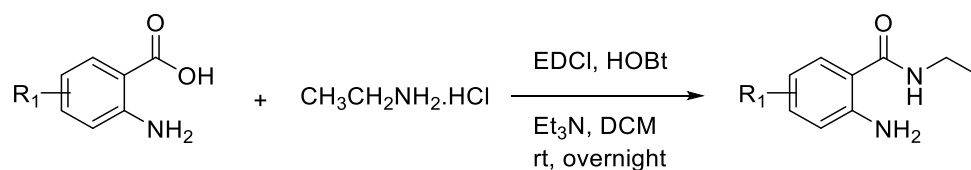

Under air atmosphere, A mixture of substituted acid (2.5 mmol, 1.0 equiv), EDCI (3.0 mmol, 1.2 equiv), HOBT (3.0 mmol, 1.2 equiv), NH<sub>4</sub>Cl (3.0 mmol, 1.2 equiv) and Et<sub>3</sub>N (7.6 mmol, 3.0 equiv) in DMSO (12.6 ml) was stirred at room temperature 12h and monitored by TLC. After the reaction was quenched with saturated NaCl solution and extracted with 20.0 mL EtOAc for three times. The organic layers were combined, dried over Na<sub>2</sub>SO<sub>4</sub>, filtered and evaporated under reduced pressure. The residues were purified by flash column chromatography on silica gel to provide the Substrates **4m-4n**.

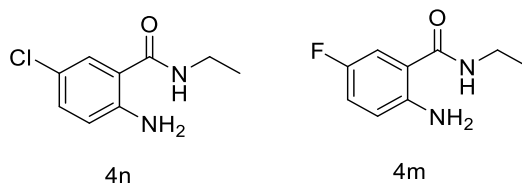

## 2.3 Synthesis of substrates **4o-4p**<sup>3</sup>

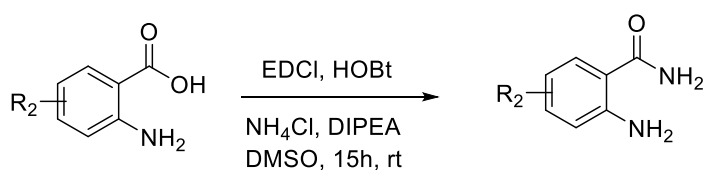

Under air atmosphere, A mixture of substituted acid (2.0 mmol, 1.0 equiv), EDC•HCl (3.0 mmol, 1.5 equiv), HOBT (3.3 mmol, 1.7 equiv), NH<sub>4</sub>Cl (6.5 mmol, 3.3 equiv) and DIPEA (13.0 mmol, 6.5 equiv) in DMSO (7.0 ml) was stirred at room temperature for 15 h and monitored by TLC. After the reaction was quenched with saturated NaCl solution and extracted with 20.0 mL EtOAc for three times. The organic layers were combined, dried over Na<sub>2</sub>SO<sub>4</sub>, filtered and evaporated under reduced pressure. The

residues were purified by flash column chromatography on silica gel to provide the Substrates **4o-4p**.

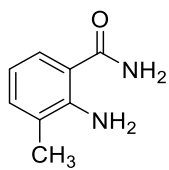

4o

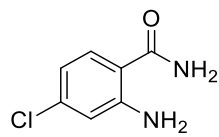

4p

### 3 Procedure for preparing compounds **3a-3y**, **5a-5t**, **6a-6c** and **7a-7n**.

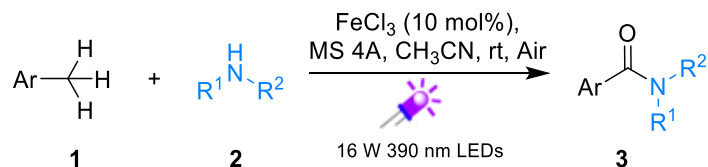

Under air atmosphere, methyl arenes **1** (3.0 mmol, 10.0 equiv), amine **2** (0.3 mmol, 1.0 equiv),  $\text{FeCl}_3$  (10 mol%, 0.01mmol) in MeCN (3.0 mL, 0.1 M) and in the presence of 4A molecular sieves were added to 20.0 mL reaction tube. The mixture was stirred at 390 nm light-emitting diodes (LEDs, 16W) and monitored by TLC. After stirring for 10-24h. Then, the reaction was quenched with saturated NaCl solution and extracted with 20.0 mL EtOAc for three times. The organic layers were combined, dried over  $\text{Na}_2\text{SO}_4$ , filtered and evaporated under reduced pressure. The residues were purified by flash column chromatography on silica gel to provide the products **3**. The products were further identified by NMR spectroscop.

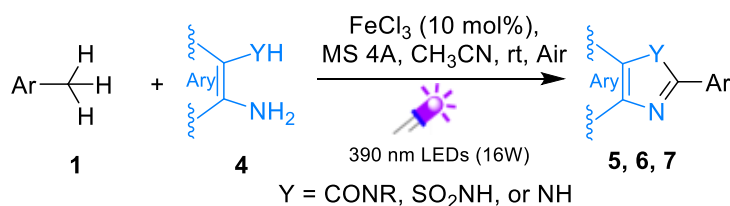

Under air atmosphere, methyl arenes **1** (3.0 mmol, 10.0 equiv), 2-aminobenzamide **4** (0.3 mmol, 1.0 equiv),  $\text{FeCl}_3$  (10 mol%, 0.01mmol) in MeCN (3.0 mL, 0.1 M) and in the presence of 4A molecular sieves added to 20.0 mL reaction tube. The mixture was stirred at 390 nm light-emitting diodes (LEDs, 16W) and monitored by TLC. After stirring for 15-30 h. Then, the reaction was quenched with saturated NaCl solution and extracted with 20.0 mL EtOAc for three times. The organic layers were combined, dried over  $\text{Na}_2\text{SO}_4$ , filtered and evaporated under reduced pressure. The residues were purified by flash column chromatography on silica gel to provide the products **5**, **6**, **7**. The products were further identified by FTIR spectroscopy, NMR spectroscopy, and HRMS.

#### 4 Spectroscopic Data of **3a-3y**, **5a-5t**, **6a-6c**, **7a-7n** and **9**.

##### *N*-Phenylbenzamide(**3a**)

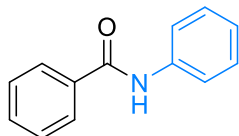

White solid; Mp: 163-165 °C; yield: 71% (41mg); **IR** (KBr): 3354, 3020, 1655, 1611, 1529, 1438, 1370, 1242, 746, 717, 686; **<sup>1</sup>H NMR** (400 MHz, DMSO-*d*<sub>6</sub>) δ 10.31 (s, 1H), 8.03 – 7.97 (m, 2H), 7.83 (d, *J* = 8.0 Hz, 2H), 7.68 – 7.53 (m, 3H), 7.40 (t, *J* = 7.7 Hz, 2H), 7.14 (t, *J* = 7.4 Hz, 1H); **<sup>13</sup>C NMR** (100 MHz, DMSO-*d*<sub>6</sub>) δ 166.0, 139.6, 135.5, 132.0, 129.1, 128.9, 128.1, 124.1, 120.8; Data consistent with those previously reported.<sup>4</sup>

##### *N*-(*m*-tolyl)benzamide(**3b**)

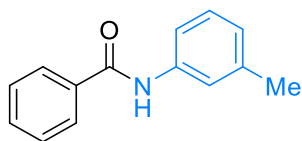

White solid; Mp: 117-119 °C; yield: 71% yield (45 mg); **IR** (KBr): 3308, 2931, 1652, 1545, 1496, 1377, 1247, 1028, 832, 779; **<sup>1</sup>H NMR** (400 MHz, DMSO-*d*<sub>6</sub>) δ 10.18 (s, 1H), 7.95 (d, *J* = 6.9 Hz, 2H), 7.63 (d, *J* = 2.0 Hz, 1H), 7.60 – 7.50 (m, 4H), 7.24 (t, *J* = 7.8 Hz, 1H), 6.93 (d, *J* = 7.5 Hz, 1H), 2.32 (s, 3H); **<sup>13</sup>C NMR** (100 MHz, DMSO-*d*<sub>6</sub>) δ 166.0, 139.6, 138.2, 135.5, 132.0, 128.9, 128.8, 128.1, 124.8, 121.4, 118.0, 21.7; Data consistent with those previously reported.<sup>5</sup>

##### *N*-(*p*-tolyl)benzamide(**3c**)

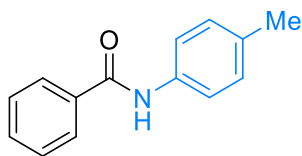

White solid; Mp: 157-159 °C; yield: 76%(48 mg); **IR** (KBr): 3347, 2935, 1660, 1527, 1378, 1321, 1248, 1030, 832, 162; **<sup>1</sup>H NMR** (400 MHz, DMSO-*d*<sub>6</sub>) δ 10.19 (s, 1H), 7.96 (d, *J* = 7.2 Hz, 2H), 7.68 (d, *J* = 8.0 Hz, 2H), 7.58 (d, *J* = 7.0 Hz, 1H), 7.53 (t, *J* =

7.4 Hz, 2H), 7.16 (d,  $J = 8.1$  Hz, 2H), 2.29 (s, 3H).  $^{13}\text{C}$  NMR (100 MHz, DMSO- $d_6$ )  $\delta$  165.8, 137.1, 135.5, 133.06, 131.9, 129.5, 128.8, 128.1, 120.9, 21.0; Data consistent with those previously reported.<sup>6</sup>

*N*-(4-bromophenyl)benzamide(**3d**)

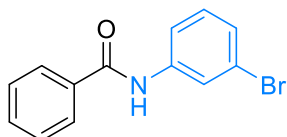

White solid; Mp: 130-132 °C; yield: 60% (50 mg); IR (KBr): 3380, 3092, 1658, 1589, 1533, 1492, 1318, 1245, 1026, 763, 701;  $^1\text{H}$  NMR (400 MHz, DMSO- $d_6$ )  $\delta$  10.42 (s, 1H), 8.13 (s, 1H), 7.96 (d,  $J = 7.5$  Hz, 2H), 7.78 (d,  $J = 7.6$  Hz, 1H), 7.65 – 7.58 (m, 1H), 7.55 (t,  $J = 7.7$  Hz, 2H), 7.37 – 7.26 (m, 2H);  $^{13}\text{C}$  NMR (100 MHz, DMSO- $d_6$ )  $\delta$  166.3, 141.3, 135.0, 132.3, 131.1, 128.9, 128.2, 126.7, 123.0, 121.9, 119.5; Data consistent with those previously reported.<sup>7</sup>

*N*-(4-bromophenyl)benzamide(**3e**)

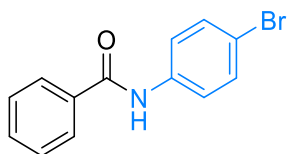

White solid; Mp: 168-170 °C; yield: 66% (54 mg); IR (KBr): 3350, 3060, 1665, 1604, 1587, 1565, 1489, 1396, 1285, 1107, 796, 717;  $^1\text{H}$  NMR (400 MHz, DMSO- $d_6$ )  $\delta$  10.39 (s, 1H), 7.99 – 7.92 (m, 2H), 7.86 – 7.75 (m, 2H), 7.63 – 7.52 (m, 5H);  $^{13}\text{C}$  NMR (100 MHz, DMSO- $d_6$ )  $\delta$  166.2, 139.2, 135.2, 132.2, 131.91, 128.9, 128.2, 122.7, 115.8; Data consistent with those previously reported.<sup>8</sup>

*N*-(4-chlorophenyl)benzamide(**3f**)

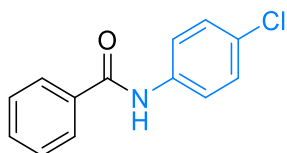

White solid; Mp: 183-185 °C; yield: 42% (30 mg); IR (KBr): 3326, 3052, 1662, 1531, 1495, 1378, 1248, 1037, 832, 765, 716;  $^1\text{H}$  NMR (400 MHz, DMSO- $d_6$ )  $\delta$  10.38 (s, 1H), 7.95 (d,  $J = 7.4$  Hz, 2H), 7.83 (d,  $J = 8.8$  Hz, 2H), 7.65 – 7.50 (m, 3H), 7.42 (d,  $J$

= 8.8 Hz, 2H);  $^{13}\text{C}$  NMR (100 MHz, DMSO- $d_6$ )  $\delta$  166.1, 138.6, 135.2, 132.2, 129.0, 128.9, 128.2, 127.7, 122.3; Data consistent with those previously reported.<sup>6</sup>

#### 3-methyl-*N*-phenylbenzamide(**3g**)

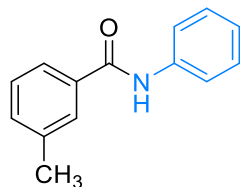

White solid; Mp: 131-133 °C; yield: 61% (38 mg); IR (KBr): 3301, 3064, 2986, 1652, 1596, 1584, 1533, 1489, 1326, 1246, 732, 706;  $^1\text{H}$  NMR (400 MHz, DMSO- $d_6$ )  $\delta$  10.22 (s, 1H), 7.82-7.72 (m, 4H), 7.41 (d,  $J$  = 4.2 Hz, 2H), 7.39-7.32 (m, 2H), 7.14-7.07 (m, 1H), 2.41 (s, 3H);  $^{13}\text{C}$  NMR (100 MHz, DMSO- $d_6$ )  $\delta$  166.1, 139.7, 138.2, 135.5, 132.6, 129.1, 128.8, 128.6, 125.3, 124.1, 120.8, 21.4; Data consistent with those previously reported.<sup>5</sup>

#### 4-methyl-*N*-phenylbenzamide(**3h**)

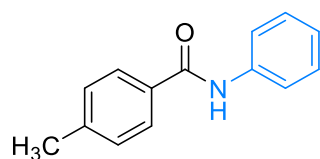

White solid; Mp: 115-117 °C; yield: 68% (43 mg); IR (KBr): 3263, 3036, 1639, 1494, 1424, 1365, 1255, 1150, 1077, 742, 702;  $^1\text{H}$  NMR (400 MHz, DMSO- $d_6$ )  $\delta$  10.14 (s, 1H), 7.87 (d,  $J$  = 7.9 Hz, 2H), 7.77 (d,  $J$  = 8.0 Hz, 2H), 7.34 (t,  $J$  = 7.5 Hz, 4H), 7.09 (t,  $J$  = 7.4 Hz, 1H), 2.39 (s, 3H);  $^{13}\text{C}$  NMR (100 MHz, DMSO- $d_6$ )  $\delta$  165.8, 142.0, 139.7, 132.6, 129.4, 129.0, 128.2, 124.0, 120.8, 21.5; Data consistent with those previously reported.<sup>4</sup>

#### 4-chloro-*N*-phenylbenzamide(**3i**)

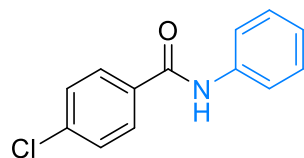

White solid; Mp: 228-230 °C; yield: 42% (29 mg); IR (KBr): 3350, 1659, 1605, 1523, 1495, 1407, 1386, 1286, 1109, 869, 753;  $^1\text{H}$  NMR (400 MHz, DMSO- $d_6$ )  $\delta$  10.32 (s,

1H), 8.02 – 7.95 (m, 2H), 7.77 (dd,  $J = 8.7, 1.2$  Hz, 2H), 7.65 – 7.58 (m, 2H), 7.36 (dd,  $J = 8.5, 7.3$  Hz, 2H), 7.12 (t,  $J = 7.4$  Hz, 1H);  $^{13}\text{C}$  NMR (100 MHz, DMSO- $d_6$ )  $\delta$  164.9, 139.4, 136.9, 134.1, 130.1, 129.1, 128.9, 124.3, 120.9; Data consistent with those previously reported.<sup>9</sup>

#### 4-cyano-*N*-phenylbenzamide (**3j**)

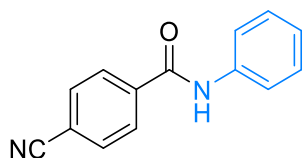

White solid; Mp: 174-176 °C; yield: 50% (33 mg); IR (KBr): 3360, 3079, 2920, 2855, 2240, 1670, 1558, 1489, 1330, 1260, 1060, 716;  $^1\text{H}$  NMR (400 MHz, DMSO- $d_6$ )  $\delta$  10.49 (s, 1H), 8.11 (d,  $J = 8.4$  Hz, 2H), 8.03 (d,  $J = 8.4$  Hz, 2H), 7.77 (d,  $J = 7.3$  Hz, 2H), 7.42 – 7.33 (m, 2H), 7.14 (t,  $J = 7.4$  Hz, 1H);  $^{13}\text{C}$  NMR (100 MHz, DMSO- $d_6$ )  $\delta$  164.6, 139.5, 139.2, 132.9, 129.2, 129.0, 124.6, 121.0, 118.9, 114.3; Data consistent with those previously reported.<sup>10</sup>

#### 4-fluoro-*N*-phenylbenzamide (**3k**)

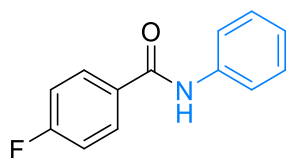

White solid; Mp: 180-182 °C; yield: 53% (34 mg); IR (KBr): 3406, 3093, 1654, 1542, 1491, 1440, 1245, 1032, 765;  $^1\text{H}$  NMR (400 MHz, DMSO- $d_6$ )  $\delta$  10.27 (s, 1H), 8.04 (dd,  $J = 8.9, 5.5$  Hz, 2H), 7.76 (dd,  $J = 8.6, 1.2$  Hz, 2H), 7.42 – 7.31 (m, 4H), 7.11 (t,  $J = 7.4$  Hz, 1H);  $^{13}\text{C}$  NMR (100 MHz, DMSO- $d_6$ )  $\delta$  164.9, 164.5 (d,  $J_{\text{C-F}} = 247.45$  Hz), 139.5, 131.9 (d,  $J_{\text{C-F}} = 2.84$  Hz), 130.9 (d,  $J_{\text{C-F}} = 9.06$  Hz), 129.1, 124.29, 120.9, 115.8 (d,  $J_{\text{C-F}} = 21.64$  Hz);  $^{19}\text{F}$  NMR (376 MHz, DMSO- $d_6$ )  $\delta$  -108.84. Data consistent with those previously reported.<sup>10</sup>

#### 3,5-dimethyl-*N*-phenylbenzamide(**3l**)



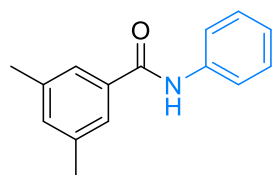

White solid; Mp: 120-122 °C; yield: 49% (33 mg); **IR** (KBr): 3331, 3008, 2964, 2873, 1750, 1651, 1607, 1537, 1442, 1328, 1245, 754, 702; **<sup>1</sup>H NMR** (400 MHz, Chloroform-*d*)  $\delta$  7.71 (s, 1H), 7.57 (dd,  $J = 8.6, 1.2$  Hz, 2H), 7.40 (s, 2H), 7.30 (dd,  $J = 8.5, 7.4$  Hz, 2H), 7.13 – 7.04 (m, 2H), 2.32 (s, 6H); **<sup>13</sup>C NMR** (100 MHz, Chloroform-*d*)  $\delta$  165.0, 137.5, 137.0, 134.0, 132.4, 128.1, 123.7, 123.4, 119.1, 20.3; Data consistent with those previously reported.<sup>12</sup>

*N*-phenylthiophene-2-carboxamide(**3m**)

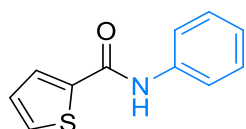

White solid; Mp: 150-152 °C; yield: 40% (24 mg); **IR** (KBr): 3338, 3097, 1643, 1606, 1541, 1443, 1364, 1322, 1262, 751, 722, 654; **<sup>1</sup>H NMR** (400 MHz, Chloroform-*d*)  $\delta$  7.65 (s, 1H), 7.59 – 7.51 (m, 3H), 7.48 (d,  $J = 3.9$  Hz, 1H), 7.30 (t,  $J = 7.9$  Hz, 2H), 7.13 – 7.03 (m, 2H); **<sup>13</sup>C NMR** (100 MHz, Chloroform-*d*)  $\delta$  158.9, 138.2, 136.6, 129.7, 128.1, 127.4, 126.8, 123.6, 119.2; Data consistent with those previously reported.<sup>13</sup>

*N*-benzylbenzamide(**3n**)

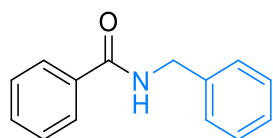

White solid; Mp: 103-105 °C; yield: 80% (51 mg); **IR** (KBr): 3310, 3054, 2926, 1661, 1554, 1441, 1399, 1254, 1086, 880, 702; **<sup>1</sup>H NMR** (400 MHz, DMSO-*d*<sub>6</sub>)  $\delta$  9.09 (t,  $J = 6.1$  Hz, 1H), 7.93 (d,  $J = 7.5$  Hz, 2H), 7.55 (t,  $J = 7.2$  Hz, 1H), 7.48 (t,  $J = 7.6$  Hz, 2H), 7.34 (d,  $J = 4.4$  Hz, 4H), 7.25 (m, 1H), 4.52 (d,  $J = 6.0$  Hz, 2H); **<sup>13</sup>C NMR** (100 MHz, DMSO-*d*<sub>6</sub>)  $\delta$  166.7, 140.2, 134.8, 131.7, 128.8, 128.8, 127.7, 127.7, 127.2, 43.1; Data consistent with those previously reported.<sup>5</sup>

*N*-(thiophen-2-ylmethyl)benzamide(**3o**)

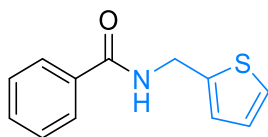

White solid; Mp: 120-122 °C; yield: 63% (41 mg); **IR** (KBr): 3348, 3020, 2925, 2863, 1656, 1540, 1487, 1376, 1249, 1031, 833, 794; **<sup>1</sup>H NMR** (400 MHz, DMSO-*d*<sub>6</sub>) δ 9.16 (t, *J* = 6.0 Hz, 1H), 7.88 (d, *J* = 7.0 Hz, 2H), 7.53 (d, *J* = 7.2 Hz, 1H), 7.48 (t, *J* = 7.3 Hz, 2H), 7.40 – 7.36 (m, 1H), 7.03 (d, *J* = 2.3 Hz, 1H), 6.97 (dd, *J* = 5.1, 3.4 Hz, 1H), 4.64 (d, *J* = 5.0 Hz, 2H); **<sup>13</sup>C NMR** (100 MHz, DMSO-*d*<sub>6</sub>) δ 166.5, 143.2, 134.6, 131.8, 128.8, 127.7, 127.1, 125.8, 125.4, 38.2; Data consistent with those previously reported.<sup>14</sup>

*N*-phenethylbenzamide(**3p**)

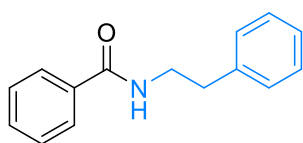

White solid; Mp: 113-115 °C; yield: 72% (49 mg); **IR** (KBr): 3340, 3058, 2935, 2883, 1654, 1540, 1463, 1249, 1058, 741, 701, 662; **<sup>1</sup>H NMR** (400 MHz, DMSO-*d*<sub>6</sub>) δ 8.59 (t, *J* = 5.6 Hz, 1H), 7.83 (d, *J* = 7.2 Hz, 2H), 7.56 – 7.42 (m, 3H), 7.31 (t, *J* = 7.4 Hz, 2H), 7.28 – 7.17 (m, 3H), 3.50 (q, *J* = 7.7, 7.2 Hz, 2H), 2.86 (t, *J* = 7.5 Hz, 2H); **<sup>13</sup>C NMR** (100 MHz, DMSO-*d*<sub>6</sub>) δ 166.6, 140.0, 135.1, 131.5, 129.1, 128.8, 128.7, 127.6, 126.6, 41.4, 35.6; Data consistent with those previously reported.<sup>15</sup>

*N*-isobutylbenzamide(**3q**)

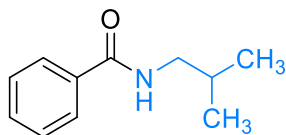

White solid; Mp: 56-58 °C; yield: 86% (46 mg); **IR** (KBr): 3343, 3071, 2965, 2880, 1642, 1546, 1488, 1462, 1299, 1159, 706; **<sup>1</sup>H NMR** (400 MHz, Chloroform-*d*) δ 7.72 – 7.67 (m, 2H), 7.44 – 7.37 (m, 1H), 7.37 – 7.31 (m, 2H), 6.31 (s, 1H), 3.20 (dd, *J* = 6.9, 6.0 Hz, 2H), 1.82 (dp, *J* = 13.5, 6.8 Hz, 1H), 0.89 (d, *J* = 6.7 Hz, 6H); **<sup>13</sup>C NMR**

(100 MHz, Chloroform-*d*)  $\delta$  166.7, 133.9, 130.3, 127.5, 125.8, 46.4, 27.6, 19.2; Data consistent with those previously reported.<sup>15</sup>

*N*-Isopentylbenzamide(**3r**)

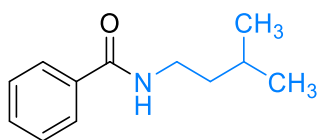

White solid; Mp: 40-42 °C; yield: 77% (44 mg); **IR** (KBr): 3317, 3072, 2962, 2877, 1643, 1545, 1463, 1308, 1164, 799, 707; **<sup>1</sup>H NMR** (400 MHz, Chloroform-*d*)  $\delta$  7.72 – 7.67 (m, 2H), 7.41 – 7.34 (m, 1H), 7.34 – 7.27 (m, 2H), 6.43 (d, 1H), 3.36 (m, *J* = 10.6, 5.2 Hz, 2H), 1.62 – 1.52 (m, 1H), 1.45 – 1.37 (m, 2H), 0.90 – 0.80 (m, 6H); **<sup>13</sup>C NMR** (100 MHz, Chloroform-*d*)  $\delta$  166.7, 133.8, 130.2, 127.4, 125.9, 37.4, 37.4, 24.9, 21.5; Data consistent with those previously reported.<sup>15</sup>

*N*-cyclopropylbenzamide(**3s**)

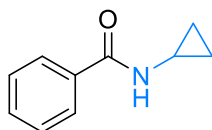

White solid; Mp: 92-94 °C; yield: 72% (35 mg); **IR** (KBr): 3248, 3073, 2930, 1632, 1548, 1492, 1443, 1318, 1027, 804, 701; **<sup>1</sup>H NMR** (400 MHz, Chloroform-*d*)  $\delta$  7.70 – 7.66 (m, 2H), 7.42 – 7.36 (m, 1H), 7.31 (t, *J* = 7.4 Hz, 2H), 6.57 (s, 1H), 2.80 (m, *J* = 7.2, 3.7 Hz, 1H), 0.75 (m, *J* = 7.1, 5.2 Hz, 2H), 0.58 – 0.52 (m, 2H); **<sup>13</sup>C NMR** (100 MHz, Chloroform-*d*)  $\delta$  168.0, 133.4, 130.39, 127.4, 125.9, 22.1, 5.7; Data consistent with those previously reported.<sup>15</sup>

*N*-cyclohexylbenzamide(**3t**)

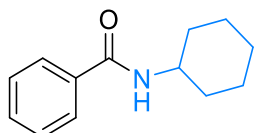

White solid; Mp: 148-150 °C; yield: 70% (42 mg); **IR** (KBr): 3336, 3028, 2930, 2676, 1691, 1533, 1426, 1245, 931, 707, 668; **<sup>1</sup>H NMR** (400 MHz, Chloroform-*d*)  $\delta$  7.80 – 7.71 (m, 2H), 7.50 – 7.45 (m, 1H), 7.41 (dd, *J* = 8.1, 6.5 Hz, 2H), 6.07 – 6.01 (d, 1H),

4.04 – 3.90 (m, 1H), 2.02 (dd,  $J = 12.6, 4.0$  Hz, 2H), 1.79 – 1.71 (m, 2H), 1.64 (dt,  $J = 13.0, 3.9$  Hz, 1H), 1.48 – 1.35 (m, 2H), 1.29 – 1.16 (m, 3H);  $^{13}\text{C}$  NMR (100 MHz, Chloroform-*d*)  $\delta$  166.7, 135.1, 131.2, 128.5, 126.9, 48.7, 33.3, 25.6, 24.9; Data consistent with those previously reported.<sup>15</sup>

*N,N*-diisobutylbenzamide(**3u**)

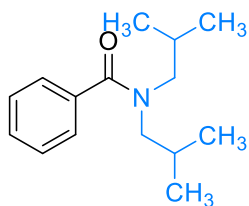

White solid; Mp: 48-50 °C; yield: 72% (51 mg); IR (KBr): 3065, 2966, 2879, 2526, 1636, 1463, 1426, 1381, 1270, 1106, 789, 718;  $^1\text{H}$  NMR (400 MHz, Chloroform-*d*)  $\delta$  7.29 (td,  $J = 6.4, 5.9, 3.9$  Hz, 5H), 3.29 (d,  $J = 7.6$  Hz, 2H), 3.02 (d,  $J = 7.5$  Hz, 2H), 2.06 (m,  $J = 6.9$  Hz, 1H), 1.77 (m,  $J = 13.5, 6.9$  Hz, 1H), 0.92 (d,  $J = 6.7$  Hz, 6H), 0.66 (d,  $J = 6.7$  Hz, 6H);  $^{13}\text{C}$  NMR (100 MHz, Chloroform-*d*)  $\delta$  171.5, 136.5, 128.0, 127.3, 126.0, 55.5, 50.12, 25.8, 25.2, 19.2, 18.8; Data consistent with those previously reported.<sup>16</sup>

*N,N*-dibenzylbenzamide(**3v**)

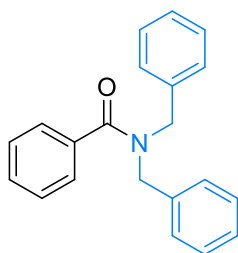

White solid; Mp: 207-209 °C; yield: 67% (60 mg); IR (KBr): 3039, 2973, 2934, 1717, 1610, 1498, 1447, 1249, 1075, 996, 716, 707;  $^1\text{H}$  NMR (400 MHz, Chloroform-*d*)  $\delta$  7.54 – 7.50 (m, 2H), 7.43 – 7.28 (m, 11H), 7.16 (d,  $J = 7.4$  Hz, 2H), 4.73 (s, 2H), 4.42 (s, 2H);  $^{13}\text{C}$  NMR (100 MHz, Chloroform-*d*)  $\delta$  172.3, 137.0, 136.5, 136.2, 129.7, 128.9, 128.8, 128.6, 128.5, 127.7, 127.6, 127.1, 126.8, 51.6, 46.9; Data consistent with those previously reported.<sup>17</sup>

*N*-methyl-*N*-phenylbenzamide(**3w**)

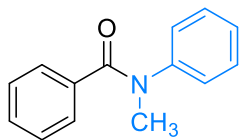

White solid; Mp: 55-57 °C; yield: 74% (47 mg); **IR** (KBr): 3068, 2962, 2871, 1647, 1590, 1496, 1370, 1297, 1105, 798, 703; **<sup>1</sup>H NMR** (400 MHz, Chloroform-*d*) δ 7.24 – 7.20 (m, 2H), 7.19 – 7.11 (m, 3H), 7.11 – 7.04 (m, 3H), 6.96 (dd, *J* = 7.2, 1.5 Hz, 2H), 3.43 (s, 3H); **<sup>13</sup>C NMR** (100 MHz, Chloroform-*d*) δ 169.7, 143.9, 134.9, 128.6, 128.1, 127.7, 126.7, 125.9, 125.5, 37.4; Data consistent with those previously reported.<sup>18</sup>

(3,4-dihydroquinolin-1(2*H*)-yl)(phenyl)methanone(**3x**)

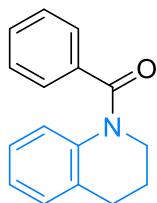

White solid; Mp: 113-115 °C; yield: 74% (47 mg); **IR** (KBr): 3065, 2957, 1644, 1493, 1377, 1265, 1153, 1101, 794, 756, 715; **<sup>1</sup>H NMR** (400 MHz, Chloroform-*d*) δ 7.31 – 7.25 (m, 3H), 7.22 – 7.18 (m, 2H), 7.08 (d, *J* = 7.5 Hz, 1H), 6.92 (t, *J* = 7.5 Hz, 1H), 6.84 – 6.75 (m, 1H), 6.64 (d, *J* = 8.2 Hz, 1H), 3.84 (t, *J* = 6.5 Hz, 2H), 2.77 (t, *J* = 6.6 Hz, 2H), 1.98 (p, *J* = 6.6 Hz, 2H); **<sup>13</sup>C NMR** (100 MHz, Chloroform-*d*) δ 169.3, 138.3, 135.3, 130.6, 129.1, 127.6, 127.3, 127.1, 124.7, 124.4, 123.5, 43.4, 25.9, 23.1; Data consistent with those previously reported.<sup>19</sup>

*N*-benzyl-*N*-methylbenzamide(**3y**)

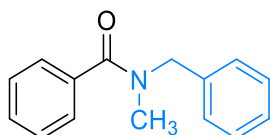

White solid; Mp: 47-49 °C; yield: 75% (51 mg); **IR** (KBr): 3063, 3036, 2928, 1635, 1493, 1447, 1402, 1264, 1072, 1028, 789, 728; **<sup>1</sup>H NMR** (400 MHz, Chloroform-*d*) δ 7.42 – 7.28 (m, 7H), 7.24 – 7.05 (m, 3H), 4.68 (s, 1H), 4.42 (s, 1H), 2.94 (s, 1.5H), 2.77 (s, 1.5H); **<sup>13</sup>C NMR** (100 MHz, Chloroform-*d*) δ 172.4, 171.7, 137.1, 136.6, 136.3,

129.7, 128.9, 128.8, 128.5, 128.2, 127.6, 127.0, 126.8, 55.2, 50.8, 37.0, 33.2; Data consistent with those previously reported.<sup>20</sup>

2-phenylquinazolin-4(3*H*)-one (**5a**)

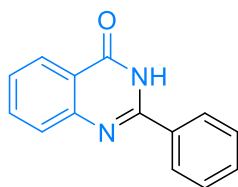

White solid; Mp: 237-238 °C; yield: 83% (55 mg); IR (KBr): 3441, 3042, 1670, 1607, 1570, 1514, 1479, 1296, 1056, 768, 690; <sup>1</sup>H NMR (400 MHz, DMSO-*d*<sub>6</sub>) δ 12.58 (s, 1H), 8.23 – 8.13 (m, 3H), 7.84 (dd, *J* = 8.4, 6.9 Hz, 1H), 7.75 (d, *J* = 7.1 Hz, 1H), 7.64 – 7.48 (m, 4H); <sup>13</sup>C NMR (100 MHz, DMSO-*d*<sub>6</sub>) δ 162.7, 152.8, 149.2, 135.1, 133.2, 131.9, 129.1, 128.2, 127.9, 127.1, 126.3, 121.4; HRMS (TOF-ESI<sup>+</sup>): *m/z* calcd for C<sub>14</sub>H<sub>10</sub>N<sub>2</sub>O [M+H]<sup>+</sup>, 223.0866; found, 223.0863; Data consistent with those previously reported.<sup>1</sup>

2-(4-methoxyphenyl)quinazolin-4(3*H*)-one (**5b**)

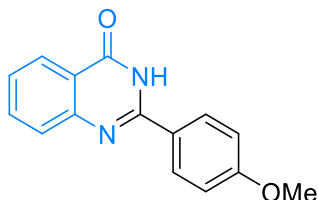

White solid; Mp: 246-247 °C; yield: 77% (58 mg); IR (KBr): 3436, 2920, 2850, 1676, 1634, 1484, 1248, 764, 686; <sup>1</sup>H NMR (400 MHz, DMSO-*d*<sub>6</sub>) δ 12.37 (s, 1H), 8.13 (d, *J* = 8.5 Hz, 2H), 8.07 (d, *J* = 7.9 Hz, 1H), 7.76 (t, *J* = 7.6 Hz, 1H), 7.64 (d, *J* = 8.2 Hz, 1H), 7.42 (t, *J* = 7.5 Hz, 1H), 7.03 (d, *J* = 8.4 Hz, 2H), 3.79 (s, 3H); <sup>13</sup>C NMR (100 MHz, DMSO-*d*<sub>6</sub>) δ 162.8, 162.3, 152.3, 149.4, 135.0, 129.9, 127.8, 126.6, 126.3, 125.3, 121.2, 114.5, 55.9; HRMS (TOF-ESI<sup>+</sup>): *m/z* calcd for C<sub>15</sub>H<sub>12</sub>N<sub>2</sub>O<sub>2</sub> [M+H]<sup>+</sup>, 253.0972; found, 253.0972; Data consistent with those previously reported.<sup>21</sup>

2-(*p*-tolyl)quinazolin-4(3*H*)-one (**5c**)

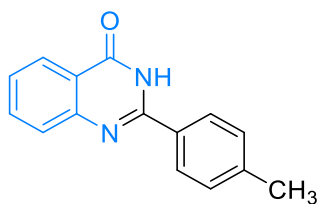

White solid; Mp: 243-244 °C; yield: 79% (56 mg); **IR** (KBr): 3240, 3199, 3140, 3071, 2944, 2892, 1763, 1691, 1648, 1601, 1545, 1502, 1446, 1326, 1253, 1207, 1170, 1065, 1007, 913, 756, 695; **<sup>1</sup>H NMR** (400 MHz, DMSO-*d*<sub>6</sub>) δ 8.15 (d, *J* = 7.9 Hz, 1H), 8.10 (d, *J* = 8.1 Hz, 2H), 7.87 – 7.79 (m, 1H), 7.73 (d, *J* = 8.5 Hz, 1H), 7.54 – 7.49 (m, 1H), 7.36 (dd, *J* = 8.4, 3.3 Hz, 2H), 2.39 (s, 3H); **<sup>13</sup>C NMR** (100 MHz, DMSO-*d*<sub>6</sub>) δ 162.8, 152.7, 149.3, 141.9, 135.0, 130.4, 129.7, 128.2, 127.9, 126.9, 126.3, 121.4, 21.5; **HRMS** (TOF-ESI<sup>+</sup>): *m/z* calcd for C<sub>15</sub>H<sub>12</sub>N<sub>2</sub>O [M+H]<sup>+</sup>, 237.1022; found, 237.1018; Data consistent with those previously reported.<sup>21</sup>

#### 2-(4-fluorophenyl)quinazolin-4(3H)-one (**5d**)

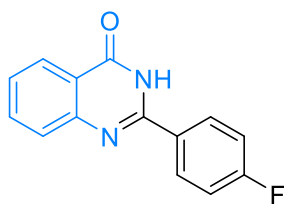

White solid; Mp: 258-259 °C; yield: 76% (55 mg); **IR** (KBr): 3440, 3043, 1667, 1607, 1444, 1285, 1050, 835, 762; **<sup>1</sup>H NMR** (400 MHz, DMSO-*d*<sub>6</sub>) δ 12.59 (s, 1H), 8.26 (dd, *J* = 8.8, 5.5 Hz, 2H), 8.16 (d, *J* = 7.9 Hz, 1H), 7.88 – 7.80 (m, 1H), 7.74 (d, *J* = 8.1 Hz, 1H), 7.56 – 7.50 (m, 1H), 7.40 (t, *J* = 8.8 Hz, 2H); **<sup>13</sup>C NMR** (100 MHz, DMSO-*d*<sub>6</sub>) δ 164.5(d, *J*<sub>C-F</sub> = 248.16 Hz), 162.7, 151.9, 149.1, 135.1, 130.8(d, *J*<sub>C-F</sub> = 8.62 Hz), 129.7(d, *J*<sub>C-F</sub> = 2.49 Hz), 127.9, 127.1, 126.3, 121.3, 116.1(d, *J*<sub>C-F</sub> = 21.83 Hz); **<sup>19</sup>F NMR** (376 MHz, DMSO-*d*<sub>6</sub>) δ -109.02; **HRMS** (TOF-ESI<sup>+</sup>): *m/z* calcd for C<sub>14</sub>H<sub>9</sub>FN<sub>2</sub>O [M+H]<sup>+</sup>, 241.0772; found, 241.0773; Data consistent with those previously reported.<sup>21</sup>

#### 2-(4-chlorophenyl)quinazolin-4(3H)-one (**5e**)

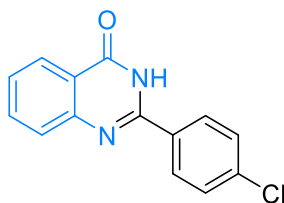

White solid; Mp: 297-299 °C; yield: 74% (57 mg); **IR** (KBr): 3314, 3087, 1676, 1611,

1567, 1482, 1444, 1006, 831; **<sup>1</sup>H NMR** (600 MHz, DMSO-*d*<sub>6</sub>) δ 12.61 (s, 1H), 8.20 (d, *J* = 8.5 Hz, 2H), 8.16 (d, *J* = 7.8 Hz, 1H), 7.85 (dd, *J* = 8.4, 7.0 Hz, 1H), 7.75 (d, *J* = 8.1 Hz, 1H), 7.63 (d, *J* = 8.5 Hz, 2H), 7.57 – 7.48 (m, 1H); **<sup>13</sup>C NMR** (150 MHz, DMSO-*d*<sub>6</sub>) δ 162.7, 151.9, 149.0, 136.8, 135.2, 132.1, 130.1, 129.2, 127.9, 127.3, 126.4, 121.4; **HRMS** (TOF-ESI<sup>+</sup>): *m/z* calcd for C<sub>14</sub>H<sub>9</sub>ClN<sub>2</sub>O [M+H]<sup>+</sup>, 257.0476; found, 257.0479; Data consistent with those previously reported.<sup>21</sup>

2-(4-bromophenyl)quinazolin-4(3*H*)-one (**5f**)

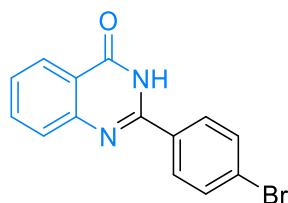

White solid; Mp: 296-297 °C; yield: 79% (70 mg); **IR** (KBr): 3456, 3047, 1673, 1600, 1569, 1447, 1049, 828, 772; **<sup>1</sup>H NMR** (400 MHz, DMSO-*d*<sub>6</sub>) δ 12.64 (s, 1H), 8.18 – 8.12 (m, 3H), 7.88 – 7.83 (m, 1H), 7.76 (t, *J* = 8.0 Hz, 3H), 7.57 – 7.53 (m, 1H); **<sup>13</sup>C NMR** (100 MHz, DMSO-*d*<sub>6</sub>) δ 162.6, 151.9, 149.0, 135.2, 132.4, 132.1, 130.3, 128.0, 127.3, 126.4, 125.7, 121.5; **HRMS** (TOF-ESI<sup>+</sup>): *m/z* calcd for C<sub>14</sub>H<sub>9</sub>BrN<sub>2</sub>O [M+H]<sup>+</sup>, 300.9971; found, 300.9971; Data consistent with those previously reported.<sup>21</sup>

2-(3-methoxyphenyl)quinazolin-4(3*H*)-one (**5g**)

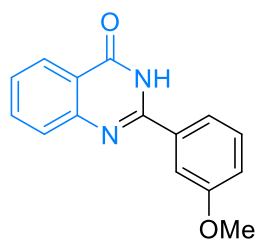

White solid; Mp: 210-212 °C; yield: 77% (58 mg); **IR** (KBr): 3415, 3046, 2963, 2874, 1670, 1610, 1499, 1220, 1028, 767, 685; **<sup>1</sup>H NMR** (400 MHz, DMSO-*d*<sub>6</sub>) δ 12.56 (s, 1H), 8.17 (dd, *J* = 7.9, 1.6 Hz, 1H), 7.87 – 7.74 (m, 4H), 7.56 – 7.43 (m, 2H), 7.16 (d, *J* = 5.8 Hz, 1H), 3.87 (s, 3H); **<sup>13</sup>C NMR** (100 MHz, DMSO-*d*<sub>6</sub>) δ 162.7, 159.8, 152.5, 149.1, 135.1, 134.5, 130.2, 128.0, 127.1, 126.3, 121.5, 120.6, 118.1, 113.0, 55.9; **HRMS** (TOF-ESI<sup>+</sup>): *m/z* calcd for C<sub>15</sub>H<sub>12</sub>N<sub>2</sub>O [M+H]<sup>+</sup>, 253.0972; found, 253.0972. Data consistent with those previously reported.<sup>22</sup>



2-(*m*-tolyl)quinazolin-4(3*H*)-one (**5h**)

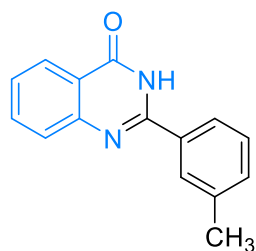

White solid; Mp: 209-211 °C; yield: 81% (57 mg); **IR** (KBr): 3411, 3055, 2978, 2878, 1680, 1610, 1495, 1026, 764, 714; **<sup>1</sup>H NMR** (400 MHz, DMSO-*d*<sub>6</sub>) δ 12.49 (s, 1H), 8.16 (dd, *J* = 8.0, 1.5 Hz, 1H), 8.03 (s, 1H), 7.97 (d, *J* = 7.4 Hz, 1H), 7.87 – 7.79 (m, 1H), 7.75 (d, *J* = 7.2 Hz, 1H), 7.52 (t, *J* = 7.5 Hz, 1H), 7.46 – 7.36 (m, 2H), 2.41 (s, 3H); **<sup>13</sup>C NMR** (100 MHz, DMSO-*d*<sub>6</sub>) δ 162.7, 152.9, 149.2, 138.4, 135.1, 133.1, 132.5, 129.0, 128.8, 128.0, 127.0, 126.3, 125.4, 121.4, 21.4; **HRMS** (TOF-ESI<sup>+</sup>): *m/z* calcd for C<sub>15</sub>H<sub>12</sub>N<sub>2</sub>O [M+H]<sup>+</sup>, 237.1022; found, 237.1018; Data consistent with those previously reported.<sup>22</sup>

2-(2-methoxyphenyl)quinazolin-4(3*H*)-one (**5i**)

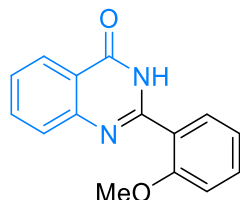

White solid; Mp: 202-203 °C; yield: 66% (50 mg); **IR** (KBr): 3329, 3053, 2980, 2897, 1681, 1604, 1462, 1382, 1050, 764, 690; **<sup>1</sup>H NMR** (400 MHz, DMSO-*d*<sub>6</sub>) δ 12.12 (s, 1H), 8.16 (dd, *J* = 7.9, 1.6 Hz, 1H), 7.87 – 7.81 (m, 1H), 7.73 – 7.69 (m, 2H), 7.57 – 7.51 (m, 2H), 7.20 (d, *J* = 7.9 Hz, 1H), 7.10 (t, *J* = 7.0 Hz, 1H), 3.87 (s, 3H); **<sup>13</sup>C NMR** (100 MHz, DMSO-*d*<sub>6</sub>) δ 161.7, 157.6, 152.8, 149.5, 134.9, 132.7, 130.9, 127.9, 127.0, 126.3, 123.1, 121.5, 120.9, 112.3, 56.3; **HRMS** (TOF-ESI<sup>+</sup>): *m/z* calcd for C<sub>15</sub>H<sub>12</sub>N<sub>2</sub>O<sub>2</sub> [M+H]<sup>+</sup>, 253.0972; found, 253.0972; Data consistent with those previously reported.<sup>23</sup>

2-(*o*-tolyl)quinazolin-4(3*H*)-one (**5j**)

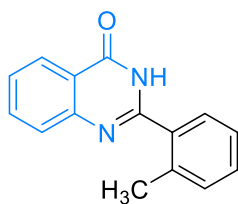

White solid; Mp: 222-224 °C; yield: 70% (50 mg); **IR** (KBr): 3437, 2919, 2850, 1726, 1684, 1611, 1594, 1242, 759, 721; **<sup>1</sup>H NMR** (400 MHz, DMSO-*d*<sub>6</sub>) δ 12.47 (s, 1H), 8.17 (d, *J* = 7.9 Hz, 1H), 7.85 (t, *J* = 7.6 Hz, 1H), 7.70 (d, *J* = 8.2 Hz, 1H), 7.59 – 7.49 (m, 2H), 7.44 (t, *J* = 7.5 Hz, 1H), 7.34 (dd, *J* = 13.5, 7.1 Hz, 2H), 2.39 (s, 3H); **<sup>13</sup>C NMR** (100 MHz, DMSO-*d*<sub>6</sub>) δ 162.3, 154.8, 149.2, 136.6, 135.0, 134.7, 131.0, 130.4, 129.6, 127.8, 127.1, 126.3, 126.2, 121.4, 20.0; **HRMS** (TOF-ESI<sup>+</sup>): *m/z* calcd for C<sub>15</sub>H<sub>12</sub>N<sub>2</sub>O [M+H]<sup>+</sup>, 237.1022; found, 237.1018; Data consistent with those previously reported.<sup>22</sup>

#### 2-(2-chlorophenyl)quinazolin-4(3H)-one (**5k**)

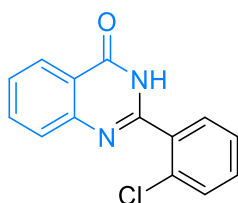

White solid; Mp: 185-186 °C; yield: 62% (48 mg); **IR** (KBr): 3445, 3057, 1667, 1514, 1435, 1295, 1142, 1050, 736; **<sup>1</sup>H NMR** (400 MHz, DMSO-*d*<sub>6</sub>) δ 12.66 (s, 1H), 8.19 (d, *J* = 6.5 Hz, 1H), 7.87 (t, *J* = 7.7 Hz, 1H), 7.70 (dd, *J* = 16.7, 7.8 Hz, 2H), 7.60 (dt, *J* = 15.2, 7.9 Hz, 3H), 7.51 (t, *J* = 6.7 Hz, 1H); **<sup>13</sup>C NMR** (100 MHz, DMSO-*d*<sub>6</sub>) δ 161.9, 152.7, 149.1, 135.1, 134.3, 132.1, 131.9, 131.3, 130.1, 128.0, 127.7, 127.5, 126.3, 121.7. **HRMS** (TOF-ESI<sup>+</sup>): *m/z* calcd for C<sub>14</sub>H<sub>9</sub>ClN<sub>2</sub>O [M+H]<sup>+</sup>, 257.0476; found, 257.0479; Data consistent with those previously reported.<sup>22</sup>

#### 2-(2-bromophenyl)quinazolin-4(3H)-one (**5l**)

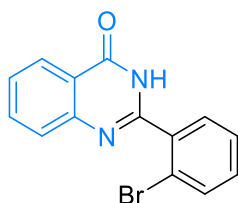

White solid; Mp: 185-187 °C; yield: 66% (59 mg); **IR** (KBr): 3407, 3087, 1688, 1609,

1566, 1472, 1307, 1050, 772; **<sup>1</sup>H NMR** (400 MHz, DMSO-*d*<sub>6</sub>) δ 12.64 (s, 1H), 8.19 (dd, *J* = 7.9, 1.5 Hz, 1H), 7.87 (m, *J* = 8.6, 7.2, 1.6 Hz, 1H), 7.78 (dd, *J* = 7.9, 1.3 Hz, 1H), 7.72 (dd, *J* = 8.3, 1.2 Hz, 1H), 7.65 (dd, *J* = 7.5, 1.9 Hz, 1H), 7.62 – 7.51 (m, 2H), 7.51 – 7.45 (m, 1H); **<sup>13</sup>C NMR** (100 MHz, DMSO-*d*<sub>6</sub>) δ 161.9, 153.8, 149.0, 136.3, 135.1, 133.1, 132.1, 131.3, 128.2, 127.9, 127.5, 126.3, 121.7, 121.4. **HRMS** (TOF-ESI<sup>+</sup>): *m/z* calcd for C<sub>14</sub>H<sub>9</sub>N<sub>2</sub>O [M+H]<sup>+</sup>, 300.9971; found, 300.9971; Data consistent with those previously reported.<sup>22</sup>

2-(3,5-dimethylphenyl)quinazolin-4(3*H*)-one (**5m**)

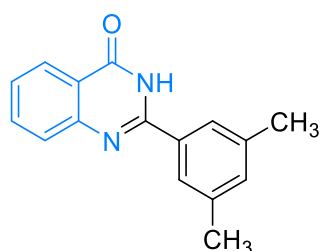

White solid; Mp: 273-275 °C; yield: 80% (60 mg); **IR** (KBr): 3326, 3135, 3063, 2924, 1677, 1600, 1543, 1496, 1442, 1389, 1324, 1265, 1160, 1085, 897, 831, 756, 691; **<sup>1</sup>H NMR** (400 MHz, DMSO-*d*<sub>6</sub>) δ 12.41 (s, 1H), 8.15 (d, *J* = 8.0 Hz, 1H), 7.87 – 7.78 (m, 3H), 7.75 (d, *J* = 8.5 Hz, 1H), 7.58 – 7.47 (m, 1H), 7.22 (s, 1H), 2.37 (s, 6H); **<sup>13</sup>C NMR** (100 MHz, DMSO-*d*<sub>6</sub>) δ 162.6, 152.9, 149.3, 138.2, 135.1, 133.2, 133.0, 127.9, 127.0, 126.3, 125.9, 121.4, 21.3. **HRMS** (TOF-ESI<sup>+</sup>): *m/z* calcd for C<sub>16</sub>H<sub>14</sub>N<sub>2</sub>O [M+H]<sup>+</sup>, 251.1179; found, 251.1183; Data consistent with those previously reported.<sup>24</sup>

2-(naphthalen-2-yl)quinazolin-4(3*H*)-one (**5n**)

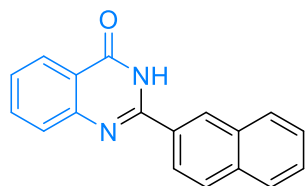

White solid; Mp: 278-288°C; yield: 50% (40 mg); **IR** (KBr): 3436, 2922, 2856, 1638, 1305, 817, 769, 743; **<sup>1</sup>H NMR** (400 MHz, DMSO-*d*<sub>6</sub>) δ 12.70 (s, 1H), 8.83 (s, 1H), 8.31 (d, *J* = 6.8 Hz, 1H), 8.19 (d, *J* = 6.5 Hz, 1H), 8.11 – 8.05 (m, 2H), 8.03 (d, *J* = 9.3 Hz, 1H), 7.90 – 7.85 (m, 1H), 7.81 (d, *J* = 7.6 Hz, 1H), 7.69 – 7.61 (m, 2H), 7.59 – 7.53

(m, 1H);  $^{13}\text{C}$  NMR (100 MHz, DMSO- $d_6$ )  $\delta$  162.7, 152.6, 149.3, 135.2, 134.6, 132.8, 130.4, 129.4, 128.7, 128.6, 128.4, 128.2, 128.0, 127.4, 127.2, 126.4, 125.0, 121.5; **HRMS** (TOF-ESI $^+$ ):  $m/z$  calcd for  $\text{C}_{18}\text{H}_{12}\text{N}_2\text{O}$   $[\text{M}+\text{H}]^+$ , 273.1022; found, 273.1028; Data consistent with those previously reported.<sup>25</sup>

2-(thiophen-2-yl)quinazolin-4(3H)-one (**5o**)

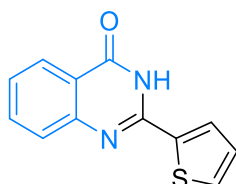

White solid; Mp: 271-272 °C; yield: 77% (53 mg); **IR** (KBr): 340, 3068, 1675, 1600, 1564, 1535, 1472, 750;  $^1\text{H}$  NMR (400 MHz, DMSO- $d_6$ )  $\delta$  12.69 (s, 1H), 8.24 (d,  $J$  = 3.9 Hz, 1H), 8.13 (d,  $J$  = 6.5 Hz, 1H), 7.88 (d,  $J$  = 5.0 Hz, 1H), 7.85 – 7.78 (m, 1H), 7.66 (d,  $J$  = 7.7 Hz, 1H), 7.53 – 7.46 (m, 1H), 7.27 – 7.22 (m, 1H);  $^{13}\text{C}$  NMR (100 MHz, DMSO- $d_6$ )  $\delta$  162.3, 149.1, 148.3, 137.8, 135.2, 132.7, 129.9, 129.0, 127.4, 126.8, 126.5, 121.4. **HRMS** (TOF-ESI $^+$ ):  $m/z$  calcd for  $\text{C}_{12}\text{H}_8\text{N}_2\text{OS}$   $[\text{M}+\text{H}]^+$ , 229.0430; found, 229.0434; Data consistent with those previously reported.<sup>22</sup>

8-methyl-2-phenylquinazolin-4(3H)-one (**5p**)

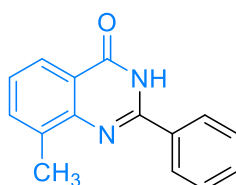

White solid; Mp: 246-248 °C; yield: 69% (49 mg); **IR** (KBr): 3450, 3071, 2961, 2875, 1675, 1599, 1544, 1493, 1328, 1280, 1056, 760, 698;  $^1\text{H}$  NMR (400 MHz, DMSO- $d_6$ )  $\delta$  12.55 (s, 1H), 8.24 (dd,  $J$  = 8.0, 1.7 Hz, 2H), 8.00 (dd,  $J$  = 8.1, 1.6 Hz, 1H), 7.71 (d,  $J$  = 7.3 Hz, 1H), 7.63 – 7.52 (m, 3H), 7.41 (t,  $J$  = 7.6 Hz, 1H), 2.63 (s, 3H);  $^{13}\text{C}$  NMR (100 MHz, DMSO- $d_6$ )  $\delta$  163.0, 151.5, 147.6, 136.1, 135.4, 133.4, 131.8, 129.1, 128.2, 126.5, 124.0, 121.4, 17.6; **HRMS** (TOF-ESI $^+$ ):  $m/z$  calcd for  $\text{C}_{15}\text{H}_{12}\text{N}_2\text{O}$   $[\text{M}+\text{H}]^+$ , 237.1022; found, 237.1022; Data consistent with those previously reported.<sup>22</sup>

7-chloro-2-phenylquinazolin-4(3H)-one (**5q**).

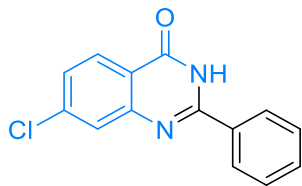

White solid; Mp: 287-288 °C; yield: 70% (54 mg); **IR** (KBr): 3458, 3041, 1669, 1604, 1555, 1447, 1294, 1050, 830, 764, 688; **<sup>1</sup>H NMR** (400 MHz, DMSO-*d*<sub>6</sub>) δ 12.69 (s, 1H), 8.26 – 8.11 (m, 3H), 7.79 (d, *J* = 2.1 Hz, 1H), 7.67 – 7.46 (m, 4H); **<sup>13</sup>C NMR** (100 MHz, DMSO-*d*<sub>6</sub>) δ 162.1, 154.2, 150.3, 139.6, 132.8, 132.2, 129.1, 128.4, 128.4, 127.3, 127.0, 120.3; **HRMS** (TOF-ESI<sup>+</sup>): *m/z* calcd for C<sub>14</sub>H<sub>9</sub>ClN<sub>2</sub>O [M+H]<sup>+</sup>, 257.0476; found, 257.0479; Data consistent with those previously reported.<sup>23</sup>

6-chloro-2-phenylquinazolin-4(3*H*)-one (**5r**)

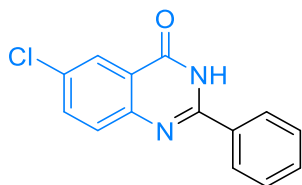

White solid; Mp: 296-297 °C; yield: 51% (39 mg); **IR** (KBr): 3407, 3086, 1678, 1608, 1476, 1096, 886, 842, 770, 685; **<sup>1</sup>H NMR** (400 MHz, DMSO-*d*<sub>6</sub>) δ 8.18 (d, *J* = 7.7 Hz, 2H), 8.10 (d, *J* = 2.4 Hz, 1H), 7.88 (d, *J* = 8.5 Hz, 1H), 7.78 (d, *J* = 8.6 Hz, 1H), 7.64 – 7.53 (m, 3H); **<sup>13</sup>C NMR** (100 MHz, DMSO-*d*<sub>6</sub>) δ 161.8, 153.3, 148.0, 135.2, 132.9, 132.1, 131.3, 130.2, 129.1, 128.3, 125.4, 122.7; **HRMS** (TOF-ESI<sup>+</sup>): *m/z* calcd for C<sub>14</sub>H<sub>9</sub>ClN<sub>2</sub>O [M+H]<sup>+</sup>, 257.0476; found, 257.0479; Data consistent with those previously reported.<sup>26</sup>

2-phenylpyrido[3,4-*d*]pyrimidin-4(3*H*)-one (**5s**)

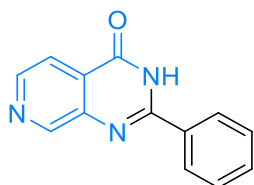

White solid; Mp: 263-265 °C; yield: 60% (40 mg); **IR** (KBr): 3310, 3264, 3067, 1766, 1616, 1493, 1377, 1251, 926, 751, 698; yield: 60% (40 mg); **<sup>1</sup>H NMR** (400 MHz, DMSO-*d*<sub>6</sub>) δ 12.89 (s, 1H), 9.12 (s, 1H), 8.66 (d, *J* = 5.1 Hz, 1H), 8.19 (d, *J* = 8.1 Hz,

2H), 7.99 (d,  $J = 5.1$  Hz, 1H), 7.59 (dt,  $J = 14.5, 7.2$  Hz, 3H);  $^{13}\text{C}$  NMR (100 MHz, DMSO- $d_6$ )  $\delta$  162.0, 154.9, 151.2, 146.3, 144.0, 132.8, 132.3, 129.2, 128.4, 126.4, 118.6. Data consistent with those previously reported.<sup>1</sup>

6-bromo-2-phenylquinazolin-4(3H)-one (**5t**).

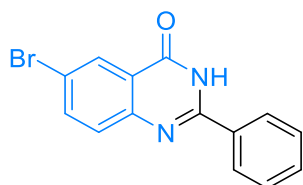

White solid; Mp: 285-286 °C; yield: 57% (51 mg); IR (KBr): 3426, 3064, 1672, 1605, 1507, 1472, 1290, 1043, 832, 773, 690;  $^1\text{H}$  NMR (400 MHz, DMSO- $d_6$ )  $\delta$  12.75 (s, 1H), 8.23 (d,  $J = 2.3$  Hz, 1H), 8.17 (d,  $J = 6.9$  Hz, 2H), 7.99 (dd,  $J = 8.7, 2.4$  Hz, 1H), 7.70 (d,  $J = 8.7$  Hz, 1H), 7.61 (d,  $J = 7.1$  Hz, 1H), 7.59 – 7.55 (m, 2H);  $^{13}\text{C}$  NMR (100 MHz, DMSO- $d_6$ )  $\delta$  161.7, 153.4, 148.2, 137.9, 132.9, 132.1, 130.4, 129.1, 128.5, 128.3, 123.1, 119.4; HRMS (TOF-ESI<sup>+</sup>):  $m/z$  calcd for C<sub>14</sub>H<sub>9</sub>BrN<sub>2</sub>O [M+H]<sup>+</sup>, 300.9971; found, 300.9971; Data consistent with those previously reported.<sup>23</sup>

2-phenyl-1H-benzo[d]imidazole (**6a**)

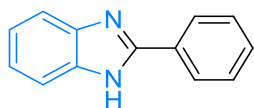

White solid; Mp: 289-292 °C; yield: 63% (37 mg); IR (KBr): 3415, 3053, 1541, 1414, 1381, 1260, 1051, 743, 712, 690;  $^1\text{H}$  NMR (400 MHz, DMSO- $d_6$ )  $\delta$  12.95 (s, 1H), 8.19 (d,  $J = 7.0$  Hz, 2H), 7.68 (d,  $J = 7.6$  Hz, 1H), 7.60 – 7.47 (m, 4H), 7.22 (t,  $J = 8.2$  Hz, 2H);  $^{13}\text{C}$  NMR (100 MHz, DMSO- $d_6$ )  $\delta$  151.7, 144.2, 135.5, 130.6, 130.3, 129.4, 126.9, 123.0, 122.2, 119.3, 111.8; HRMS (TOF-ESI<sup>+</sup>):  $m/z$  calcd for C<sub>13</sub>H<sub>10</sub>N<sub>2</sub> [M+H]<sup>+</sup>, 195.0917; found, 195.0922; Data consistent with those previously reported.<sup>21</sup>

3-phenyl-2H-benzo[e][1,2,4]thiadiazine 1,1-dioxide (**6b**)

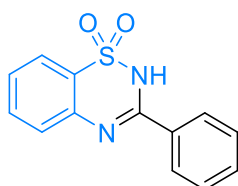

White solid; Mp: 293-295 °C; yield: 71% (55 mg); **IR** (KBr): 3315, 3037, 1658, 1558, 1529, 1483, 1381, 1299, 1030, 832, 696; yield: 71% (55 mg); **<sup>1</sup>H NMR** (400 MHz, DMSO-*d*<sub>6</sub>) δ 12.23 (s, 1H), 8.05 (d, *J* = 7.3 Hz, 2H), 7.88 (d, *J* = 8.0 Hz, 1H), 7.73 (dt, *J* = 13.9, 7.1 Hz, 2H), 7.68 – 7.60 (m, 3H), 7.52 (t, *J* = 7.6 Hz, 1H); **<sup>13</sup>C NMR** (100 MHz, DMSO-*d*<sub>6</sub>) δ 155.3, 135.9, 133.7, 133.4, 132.3, 129.4, 128.7, 127.2, 123.8, 121.9, 118.9; Data consistent with those previously reported.<sup>1</sup>

#### 2-phenyl-1,2,3,4-tetrahydroquinazoline (**6c**)

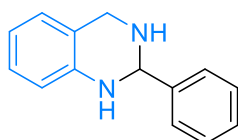

Yellow solid; Mp: 101-103 °C; yield: 70% (44 mg); **IR** (KBr): 3306, 3026, 2856, 1676, 1607, 1476, 1354, 1306, 1249, 1026, 854, 738, 692; **<sup>1</sup>H NMR** (400 MHz, Chloroform-*d*) δ 7.52 (d, *J* = 7.8 Hz, 2H), 7.41 – 7.35 (m, 3H), 7.06 (d, *J* = 6.9 Hz, 1H), 6.95 (d, *J* = 8.1 Hz, 1H), 6.73 (t, *J* = 6.9 Hz, 1H), 6.59 (dd, *J* = 8.0, 1.1 Hz, 1H), 5.25 (s, 1H), 4.29 (d, *J* = 16.7 Hz, 1H), 4.00 (d, *J* = 16.7 Hz, 1H), 3.63 (s, 2H); **<sup>13</sup>C NMR** (100 MHz, Chloroform-*d*) δ 143.6, 141.3, 128.8, 128.7, 127.4, 126.7, 126.3, 121.1, 118.3, 115.1, 69.6, 46.4; Data consistent with those previously reported.<sup>27</sup>

#### 3-ethyl-2-phenylquinazolin-4(3*H*)-one (**7a**)

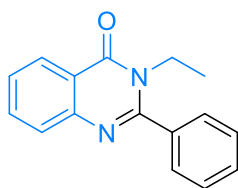

White solid; Mp: 155-156 °C; yield: 80% (60 mg); **IR** (KBr): 3192, 2974, 2930, 2867, 1676, 1587, 1571, 1472, 1381, 1052, 770, 701; **<sup>1</sup>H NMR** (400 MHz, DMSO-*d*<sub>6</sub>) δ 8.20 (d, *J* = 8.1 Hz, 1H), 7.85 (td, *J* = 7.8, 7.1, 1.6 Hz, 1H), 7.69 – 7.63 (m, 3H), 7.60 – 7.55 (m, 4H), 3.90 (q, *J* = 7.0 Hz, 2H), 1.10 (t, *J* = 7.0 Hz, 3H); **<sup>13</sup>C NMR** (100 MHz, DMSO-*d*<sub>6</sub>) δ 161.5, 156.5, 147.4, 135.9, 134.9, 130.1, 128.9, 128.3, 127.6, 127.4, 126.6, 121.0, 41.1, 14.1; **HRMS** (TOF-ESI<sup>+</sup>): *m/z* calcd for C<sub>16</sub>H<sub>14</sub>N<sub>2</sub>O [M+H]<sup>+</sup>, 251.1179; found, 251.1183; Data consistent with those previously reported.<sup>28</sup>

3-isopropyl-2-phenylquinazolin-4(3H)-one (**7b**)

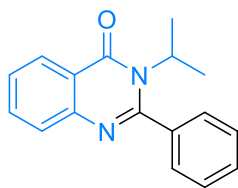

White solid; Mp: 131-133 °C; yield: 73% (58 mg); **IR** (KBr): 3071, 2973, 2878, 1677, 1568, 1471, 1338, 1052, 774, 705; **<sup>1</sup>H NMR** (400 MHz, Chloroform-*d*) δ 8.31 (d, *J* = 7.6 Hz, 1H), 7.77 – 7.68 (m, 2H), 7.52 (m, 6H), 4.35 (h, *J* = 6.8 Hz, 1H), 1.59 (d, *J* = 6.8 Hz, 6H); **<sup>13</sup>C NMR** (100 MHz, Chloroform-*d*) δ 162.6, 156.7, 146.8, 136.5, 134.2, 129.7, 129.0, 127.3, 127.2, 126.9, 126.4, 122.2, 54.1, 19.7; **HRMS** (TOF-ESI<sup>+</sup>): *m/z* calcd for C<sub>17</sub>H<sub>16</sub>N<sub>2</sub>O [M+H]<sup>+</sup>, 265.1335; found, 265.1339; Data consistent with those previously reported.<sup>1</sup>

3-isobutyl-2-phenylquinazolin-4(3H)-one (**7c**)

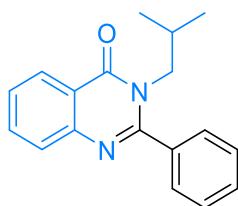

White solid; Mp: 90-91 °C; yield: 78% (65 mg); **IR** (KBr): 3056, 2975, 2930, 2876, 2860, 1680, 1605, 1588, 1496, 1379, 1057, 774, 705; **<sup>1</sup>H NMR** (400 MHz, Chloroform-*d*) δ 8.34 (d, *J* = 7.7 Hz, 1H), 7.79 – 7.73 (m, 2H), 7.54 – 7.49 (m, 6H), 3.98 (d, *J* = 7.4 Hz, 2H), 1.94 (m, *J* = 6.9 Hz, 1H), 0.72 (d, *J* = 6.7 Hz, 6H); **<sup>13</sup>C NMR** (100 MHz, Chloroform-*d*) δ 162.6, 156.5, 147.2, 135.7, 134.3, 129.8, 128.7, 128.3, 127.5, 127.0, 126.9, 120.9, 52.2, 27.7, 19.9; **HRMS** (TOF-ESI<sup>+</sup>): *m/z* calcd for C<sub>18</sub>H<sub>18</sub>N<sub>2</sub>O [M+H]<sup>+</sup>, 279.1492; found, 279.1495.

3-butyl-2-phenylquinazolin-4(3H)-one (**7d**)

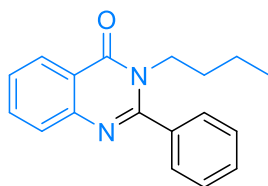

White solid; Mp: 169-170 °C; yield: 66% (55 mg); **IR** (KBr): 3050, 2978, 2933, 2900,



1677, 1588, 1470, 1379, 1052, 770, 690; **<sup>1</sup>H NMR** (400 MHz, Chloroform-*d*)  $\delta$  8.34 (d,  $J = 7.4$  Hz, 1H), 7.84 – 7.66 (m, 2H), 7.53 (m, 6H), 4.05 – 3.92 (m, 2H), 1.59 (p,  $J = 7.6$  Hz, 2H), 1.19 (dt,  $J = 14.9, 7.4$  Hz, 2H), 0.76 (t,  $J = 7.3$  Hz, 3H); **<sup>13</sup>C NMR** (100 MHz, Chloroform-*d*)  $\delta$  162.2, 156.3, 147.2, 135.5, 134.3, 129.8, 128.8, 127.8, 127.4, 127.0, 126.8, 120.9, 45.7, 30.7, 19.9, 13.4; **HRMS** (TOF-ESI<sup>+</sup>):  $m/z$  calcd for C<sub>18</sub>H<sub>18</sub>N<sub>2</sub>O [M+H]<sup>+</sup>, 279.1492; found, 279.1495; Data consistent with those previously reported.<sup>25</sup>

### 3-hexyl-2-phenylquinazolin-4(3*H*)-one (**7e**)

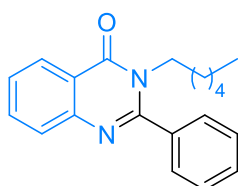

White solid; Mp: 103.6-104.4 °C; yield: 60% (55 mg); **IR** (KBr): 3068, 2979, 2937, 2885, 2861, 1680, 1588, 1569, 1505, 1470, 1373, 1068, 768, 727, 689; **<sup>1</sup>H NMR** (400 MHz, Chloroform-*d*)  $\delta$  8.26 (d,  $J = 8.8$  Hz, 1H), 7.67 (dd,  $J = 6.4, 1.5$  Hz, 2H), 7.45 (m, 6H), 3.96 – 3.85 (m, 2H), 1.58 – 1.48 (m, 2H), 1.08 (dq,  $J = 22.4, 8.7, 7.6$  Hz, 6H), 0.72 (t,  $J = 7.0$  Hz, 3H); **<sup>13</sup>C NMR** (100 MHz, Chloroform-*d*)  $\delta$  161.1, 155.2, 146.2, 134.6, 133.3, 128.8, 127.7, 126.8, 126.4, 125.9, 125.7, 119.9, 44.9, 30.0, 27.5, 25.3, 21.3, 12.9; **HRMS** (TOF-ESI<sup>+</sup>):  $m/z$  calcd for C<sub>20</sub>H<sub>22</sub>N<sub>2</sub>O [M+H]<sup>+</sup>, 307.1805; found, 307.1807; Data consistent with those previously reported.<sup>29</sup>

### 3-cyclopropyl-2-phenylquinazolin-4(3*H*)-one (**7f**)

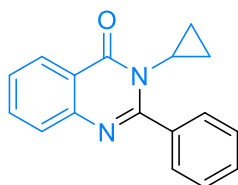

White solid; Mp: 112-114 °C; yield: 71% (56 mg); **IR** (KBr): 3060, 3025, 2953, 2911, 2843, 1670, 1600, 1565, 1504, 1341, 1050, 772, 720, 689; **<sup>1</sup>H NMR** (400 MHz, Chloroform-*d*)  $\delta$  8.31 (d,  $J = 8.0$  Hz, 1H), 7.78 – 7.68 (m, 4H), 7.54 – 7.46 (m, 4H), 3.14 (dt,  $J = 7.2, 3.4$  Hz, 1H), 0.93 (q,  $J = 7.0$  Hz, 2H), 0.54 – 0.46 (m, 2H); **<sup>13</sup>C NMR**

(100 MHz, Chloroform-*d*)  $\delta$  164.0, 156.9, 147.1, 136.2, 134.3, 129.9, 128.5, 128.3, 127.4, 126.9, 126.6, 120.9, 30.3, 11.3; **HRMS** (TOF-ESI<sup>+</sup>):  $m/z$  calcd for C<sub>17</sub>H<sub>14</sub>N<sub>2</sub>O [M+H]<sup>+</sup>, 263.1179; found, 263.1181; Data consistent with those previously reported.<sup>28</sup>

3-cyclohexyl-2-phenylquinazolin-4(3*H*)-one (**7g**)

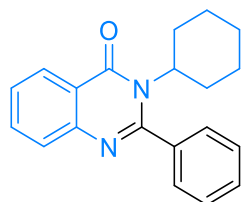

White solid; Mp: 135-137 °C; yield: 64% (58 mg); **IR** (KBr): 3043, 2977, 2928, 1681, 1595, 1569, 1269, 1089, 1049, 766, 758, 721, 689; **<sup>1</sup>H NMR** (400 MHz, Chloroform-*d*)  $\delta$  8.30 (d,  $J$  = 9.1 Hz, 1H), 7.75 – 7.69 (m, 2H), 7.54 – 7.48 (m, 6H), 3.92 – 3.82 (m, 1H), 2.73 (qd,  $J$  = 12.6, 3.7 Hz, 2H), 1.74 (dd,  $J$  = 30.3, 13.1 Hz, 4H), 1.28 – 1.24 (m, 2H), 1.03 – 0.94 (m, 2H); **<sup>13</sup>C NMR** (100 MHz, Chloroform-*d*)  $\delta$  162.7, 157.0, 146.6, 136.3, 134.3, 134.2, 129.8, 128.9, 127.1, 127.1, 126.9, 126.5, 123.6, 122.2, 62.7, 28.9, 26.2, 25.0; **HRMS** (TOF-ESI<sup>+</sup>):  $m/z$  calcd for C<sub>20</sub>H<sub>20</sub>N<sub>2</sub>O [M+H]<sup>+</sup>, 305.1648; found, 305.1649; Data consistent with those previously reported.<sup>30</sup>

2-phenyl-3-(thiophen-2-ylmethyl)quinazolin-4(3*H*)-one (**7h**)

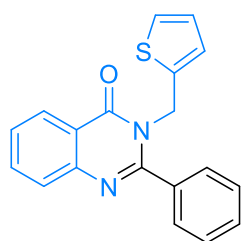

White solid; Mp: 128-129 °C; yield: 70% (66 mg); **IR** (KBr): 3084, 3056, 2912, 2883, 1677, 1589, 1570, 1472, 1431, 1215, 1027, 774, 713, 691; **<sup>1</sup>H NMR** (400 MHz, Chloroform-*d*)  $\delta$  8.38 (dd,  $J$  = 8.0, 1.4 Hz, 1H), 7.78 – 7.73 (m, 2H), 7.56 – 7.47 (m, 6H), 7.16 (dd,  $J$  = 5.1, 1.2 Hz, 1H), 6.83 (dd,  $J$  = 5.1, 3.5 Hz, 1H), 6.61 (d,  $J$  = 4.7 Hz, 1H), 5.38 (s, 2H); **<sup>13</sup>C NMR** (100 MHz, Chloroform-*d*)  $\delta$  162.2, 155.8, 147.2, 138.2, 135.0, 134.6, 130.1, 128.8, 128.3, 127.6, 127.3, 127.2, 127.0, 126.3, 126.0, 120.9, 44.1; **HRMS** (TOF-ESI<sup>+</sup>):  $m/z$  calcd for C<sub>19</sub>H<sub>14</sub>N<sub>2</sub>OS [M+H]<sup>+</sup>, 319.0900; found, 319.0897; Data consistent with those previously reported.<sup>1</sup>

3-benzyl-2-phenylquinazolin-4(3*H*)-one (**7i**)

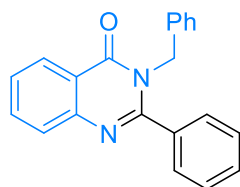

White solid; Mp: 125-128 °C; yield: 65% (61 mg); **IR** (KBr): 3060, 2928, 2890, 2677, 1609, 1580, 1452, 1382, 1050, 717, 688; **<sup>1</sup>H NMR** (400 MHz, DMSO-*d*<sub>6</sub>) δ 8.23 (d, *J* = 8.0 Hz, 1H), 7.97 – 7.83 (m, 1H), 7.73 (d, *J* = 8.2 Hz, 1H), 7.61 (t, *J* = 7.5 Hz, 1H), 7.54 – 7.40 (m, 5H), 7.22 (d, *J* = 7.3 Hz, 3H), 6.98 – 6.85 (m, 2H), 5.19 (s, 2H); **<sup>13</sup>C NMR** (100 MHz, DMSO-*d*<sub>6</sub>) δ 161.9, 156.6, 147.4, 137.2, 135.6, 135.2, 130.2, 128.9, 128.7, 128.7, 127.8, 127.7, 127.6, 126.9, 126.7, 120.9, 48.7; **HRMS** (TOF-ESI<sup>+</sup>): *m/z* calcd for C<sub>21</sub>H<sub>16</sub>N<sub>2</sub>O [M+H]<sup>+</sup>, 313.1335; found, 313.1340; Data consistent with those previously reported.<sup>1</sup>

3-phenethyl-2-phenylquinazolin-4(3*H*)-one (**7j**)

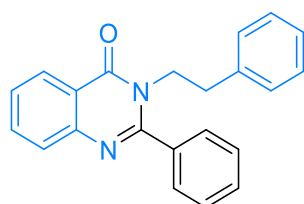

White solid; Mp: 176-179 °C; yield: 62% (60 mg); **IR** (KBr): 3411, 3065, 2979, 2893, 1677, 1585, 1446, 1380, 1051, 755, 690; **<sup>1</sup>H NMR** (400 MHz, Chloroform-*d*) δ 8.30 (dd, *J* = 8.0, 1.4 Hz, 1H), 7.73 – 7.65 (m, 2H), 7.48 – 7.39 (m, 4H), 7.31 (dd, *J* = 7.9, 1.7 Hz, 2H), 7.10 (dd, *J* = 5.0, 1.9 Hz, 3H), 6.84 – 6.76 (m, 2H), 4.16 – 4.07 (t, 2H), 2.87 – 2.79 (t, 2H); **<sup>13</sup>C NMR** (100 MHz, Chloroform-*d*) δ 161.1, 155.1, 146.1, 136.7, 134.3, 133.4, 128.8, 127.7, 127.5, 126.7, 126.5, 126.1, 125.7, 125.6, 119.9, 46.5, 33.6; **HRMS** (TOF-ESI<sup>+</sup>): *m/z* calcd for C<sub>22</sub>H<sub>18</sub>N<sub>2</sub>O [M+H]<sup>+</sup>, 327.1492; found, 327.1496; Data consistent with those previously reported.<sup>1</sup>

3-ethyl-6-fluoro-2-phenylquinazolin-4(3*H*)-one (**7k**)

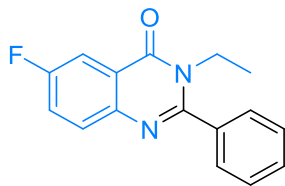

White solid; Mp: 89-90 °C; yield: 59% (47 mg); **IR** (KBr): 3049, 2964, 2919, 2883, 2853, 1680, 1570, 1483, 1446, 1376, 1346, 1225, 1104, 884, 846, 766, 699; **<sup>1</sup>H NMR** (400 MHz, Chloroform-*d*) δ 7.96 (dd, *J* = 8.5, 2.9 Hz, 1H), 7.74 (dd, *J* = 8.9, 4.9 Hz, 1H), 7.53 (m, 6H), 4.04 (q, *J* = 7.1 Hz, 2H), 1.22 (t, *J* = 7.1 Hz, 3H); **<sup>13</sup>C NMR** (100 MHz, Chloroform-*d*) δ 162.24, 161.4(d, *J*<sub>C-F</sub> = 3.52 Hz), 159.8, 155.5(d, *J*<sub>C-F</sub> = 2.4 Hz), 143.91, 135.35, 129.93(d, *J*<sub>C-F</sub> = 8.13 Hz), 128.88, 127.68, 123.0(d, *J*<sub>C-F</sub> = 24.29 Hz), 122.23(d, *J*<sub>C-F</sub> = 8.5 Hz), 111.52(d, *J*<sub>C-F</sub> = 23.47 Hz), 41.37, 14.05; **<sup>19</sup>F NMR** (376 MHz, Chloroform-*d*) δ -112.41; **HRMS** (TOF-ESI<sup>+</sup>): *m/z* calcd for C<sub>16</sub>H<sub>13</sub>FN<sub>2</sub>O [M+H]<sup>+</sup>, 269.1085; found, 269.1087.

6-chloro-2-phenylquinazolin-4(3H)-one (**7l**)

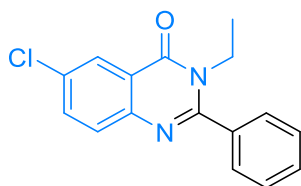

White solid; Mp: 93-94 °C; yield: 52% (44 mg); **IR** (KBr): 3468, 3066, 2985, 2924, 2882, 1679, 1583, 1464, 1382, 1263, 1169, 1059, 922, 878, 782, 702; **<sup>1</sup>H NMR** (400 MHz, Chloroform-*d*) δ 8.26 (dd, *J* = 8.6, 1.4 Hz, 1H), 7.72 (d, *J* = 1.9 Hz, 1H), 7.53 (d, *J* = 1.7 Hz, 5H), 7.46 (d, *J* = 8.6 Hz, 1H), 4.03 (q, *J* = 6.8 Hz, 2H), 1.23 (t, *J* = 7.4 Hz, 3H); **<sup>13</sup>C NMR** (100 MHz, Chloroform-*d*) δ 161.5, 157.5, 148.1, 140.5, 135.3, 130.0, 128.9, 128.3, 127.6, 127.57, 127.0, 119.4, 41.4, 14.1; **HRMS** (TOF-ESI<sup>+</sup>): *m/z* calcd for C<sub>16</sub>H<sub>13</sub>ClN<sub>2</sub>O [M+H]<sup>+</sup>, 285.0789; found, 285.0792.

4-(4-methoxybenzyl)-2-phenylquinazolin-4(3H)-one (**7m**)

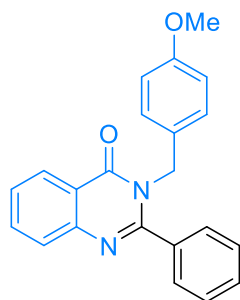

White solid; Mp: 187-189 °C; yield: 61% (63 mg); **IR** (KBr): 33066, 2966, 2877, 1670, 1607, 1586, 1570, 1471, 1381, 1254, 1084, 828, 774, 701; **<sup>1</sup>H NMR** (400 MHz, Chloroform-*d*) δ 8.37 (d, *J* = 9.1 Hz, 1H), 7.80 – 7.73 (m, 2H), 7.56 – 7.40 (m, 4H), 7.36 (d, *J* = 6.7 Hz, 2H), 6.85 (d, *J* = 8.7 Hz, 2H), 6.72 (d, *J* = 8.7 Hz, 2H), 5.22 (s, 2H), 3.75 (s, 3H); **<sup>13</sup>C NMR** (100 MHz, Chloroform-*d*) δ 162.5, 158.9, 156.4, 147.3, 135.4, 134.5, 129.9, 128.7, 128.6, 128.1, 127.6, 127.1, 127.1, 121.0, 113.8, 55.2, 48.2; **HRMS** (TOF-ESI<sup>+</sup>): *m/z* calcd for C<sub>22</sub>H<sub>18</sub>N<sub>2</sub>O<sub>2</sub> [M+H]<sup>+</sup>, 343.1441; found 343.1441; Data consistent with those previously reported.<sup>31</sup>

2-phenyl-3-(3-phenylpropyl)quinazolin-4(3*H*)-one (**7n**)

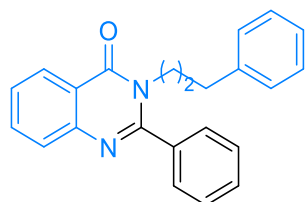

White solid; Mp: 135-136 °C; yield: 59% (60 mg); **IR** (KBr): 3078, 2922, 2856, 1674, 1587, 1570, 1503, 1469, 1051, 775, 698, 690; **<sup>1</sup>H NMR** (400 MHz, Chloroform-*d*) δ 8.25 (d, *J* = 7.8 Hz, 1H), 7.67 (dd, *J* = 8.6, 1.9 Hz, 2H), 7.49 – 7.35 (m, 6H), 7.13 – 7.02 (m, 3H), 6.90 (d, *J* = 6.8 Hz, 2H), 4.02 – 3.81 (t, 2H), 2.43 (t, *J* = 7.6 Hz, 2H), 1.87 (p, *J* = 7.6 Hz, 2H); **<sup>13</sup>C NMR** (100 MHz, Chloroform-*d*) δ 162.2, 156.1, 147.2, 140.5, 135.4, 134.4, 129.8, 128.8, 128.4, 128.1, 127.7, 127.5, 127.0, 126.8, 126.0, 120.9, 45.6, 32.9, 29.8; **HRMS** (TOF-ESI<sup>+</sup>): *m/z* calcd for C<sub>23</sub>H<sub>20</sub>N<sub>2</sub>O [M+H]<sup>+</sup>, 341.1648; found, 341.1652; Data consistent with those previously reported.<sup>25</sup>

2-chloro-1-phenylethan-1-one (**9**)

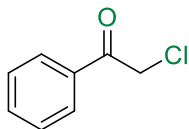

Yellow solid; yield: 15% (7 mg);  $^1\text{H NMR}$  (400 MHz, Chloroform-*d*)  $\delta$  7.96 (dd,  $J = 8.4, 1.3$  Hz, 2H), 7.65 – 7.60 (m, 1H), 7.53 – 7.48 (m, 2H), 4.73 (s, 2H);  $^{13}\text{C NMR}$  (100 MHz, Chloroform-*d*)  $\delta$  191.10, 134.24, 134.05, 128.93, 128.54, 46.09; Data consistent with those previously reported.<sup>33</sup>

4-formylbenzonitrile

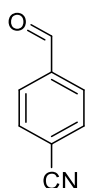

White solid; yield: 61% (80 mg);  $^1\text{H NMR}$  (400 MHz, DMSO-*d*<sub>6</sub>)  $\delta$  10.10 (s, 1H), 8.08 (s, 4H).

(*E*)-N,1-diphenylmethanimine(11)

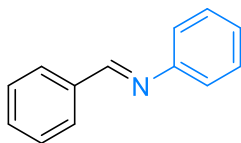

Yellow oil;  $^1\text{H NMR}$  (400 MHz, Chloroform-*d*)  $\delta$  8.46 (s, 1H), 7.95 – 7.88 (m, 2H), 7.48 (dd,  $J = 5.1, 1.9$  Hz, 3H), 7.44 – 7.36 (m, 2H), 7.28 – 7.18 (m, 4H);  $^{13}\text{C NMR}$  (100 MHz, Chloroform-*d*)  $\delta$  160.45, 152.10, 136.22, 131.40, 129.16, 128.82, 128.79, 125.95, 120.88; Data consistent with those previously reported.<sup>33</sup>

## 5 Control experiments

### 1. Benzaldehyde observation

In reaction of the synthesis of 2-aryl quinazolinones, benzaldehyde was detected in TLC. The mixture were purified by flash column chromatography on silica gel(Petroleum ether/EtOAc 20:1). Even though we couldn't provide purified product of benzaldehyde because of its volatility and instability, the product(mixture) were further identified by  $^1\text{H}$  NMR spectroscopy. Fortunately, we separated 4-formylbenzonitrile.

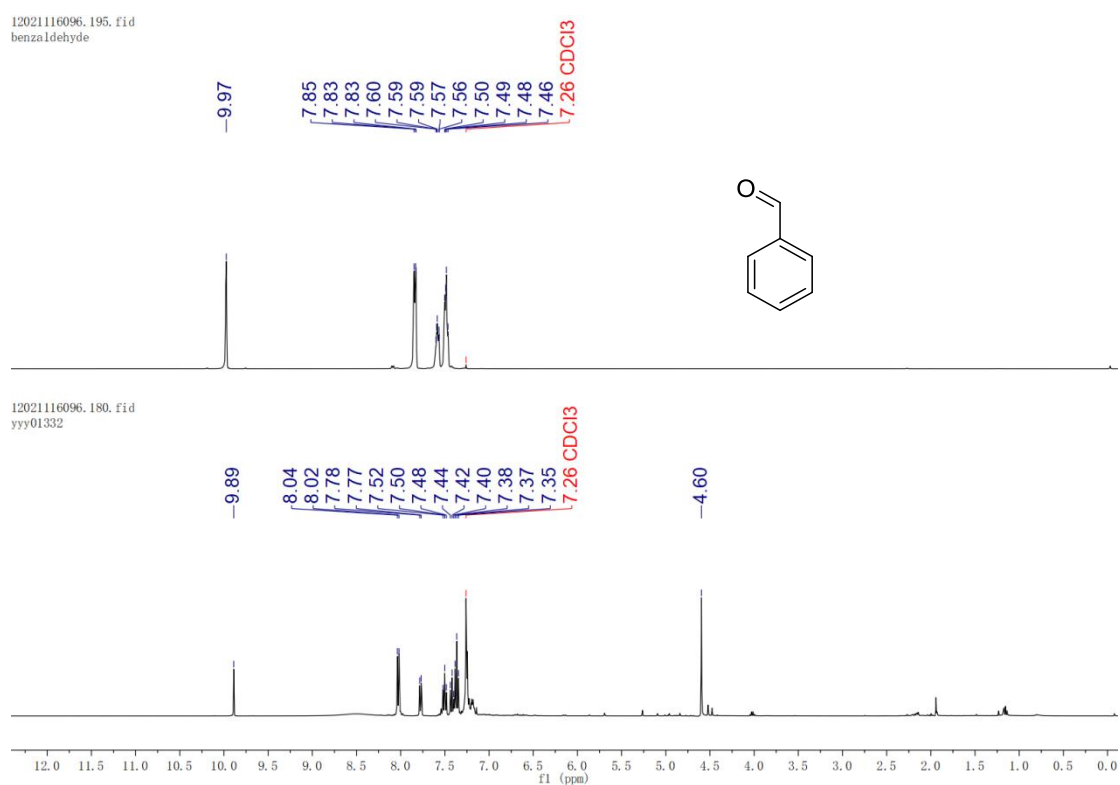

Figure S2  $^1\text{H}$ -NMR spectrum of the mixture fraction and benzaldehyde

## 2. Capture of "Cl" radical

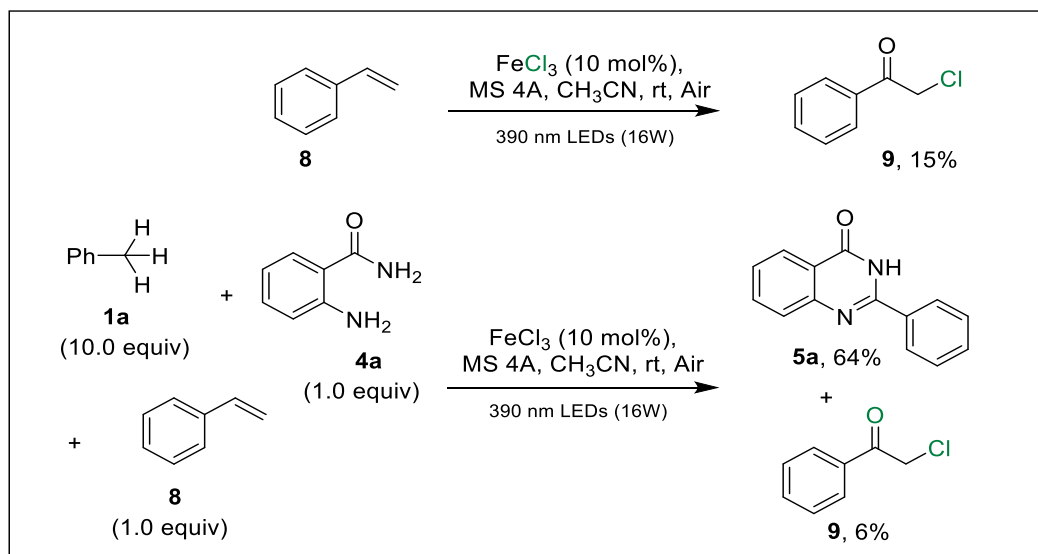

Scheme S1. Chlorine radical capture

Inspired by some literature,<sup>32</sup> we tried to capture chlorine free radicals in the reaction system (Scheme S1). We added 1.0 equiv of Styrene in the reaction, and the results showed that the yield of 2-arylquinazolinone product **5a** was reduced, and the presence of the chlorination product **9** suggested the generation of chlorine radical species during the reaction process.

## 3. Capture of benzyl radical

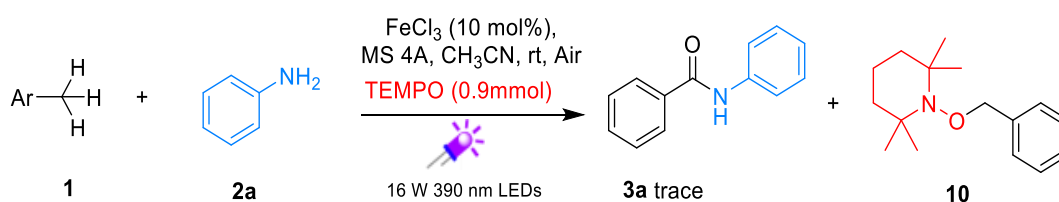

Under air atmosphere, toluene **1** (3.0 mmol, 10.0 equiv), amine **2a** (0.3 mmol, 1.0 equiv),  $\text{FeCl}_3$  (10 mol%, 0.01 mmol) and TEMPO (0.9 mmol, 3.0 equiv) in MeCN (3.0 mL, 0.1 M) and in the presence of 4A molecular sieves were added to 20.0 mL reaction tube. The mixture was stirred at 390 nm light-emitting diodes (LEDs, 16W) and monitored by TLC. After stirring for 12h. Then, the reaction was quenched with saturated NaCl solution and extracted with 20.0 mL EtOAc for three times. The organic layers were combined, dried over  $\text{Na}_2\text{SO}_4$ , filtered and evaporated under reduced



pressure. The residues were purified by flash column chromatography on silica gel. Benzylated-TEMPO was obtained and trace amount of 3a was obtained. This product was further identified by NMR spectroscopy.

### 1-(benzyloxy)-2,2,6,6-tetramethylpiperidine (**10**)

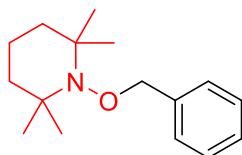

White oil;  $^1\text{H NMR}$  (400 MHz, Chloroform-*d*)  $\delta$  7.39 – 7.26 (m, 5H), 4.83 (s, 2H), 1.57 – 1.46 (m, 5H), 1.37 – 1.32 (m, 1H), 1.26 (s, 6H), 1.15 (s, 6H);  $^{13}\text{C NMR}$  (100 MHz, Chloroform-*d*)  $\delta$  138.35, 128.25, 127.48, 127.33, 78.76, 60.04, 39.75, 33.13, 20.34, 17.16; Data consistent with those previously reported.<sup>1</sup>

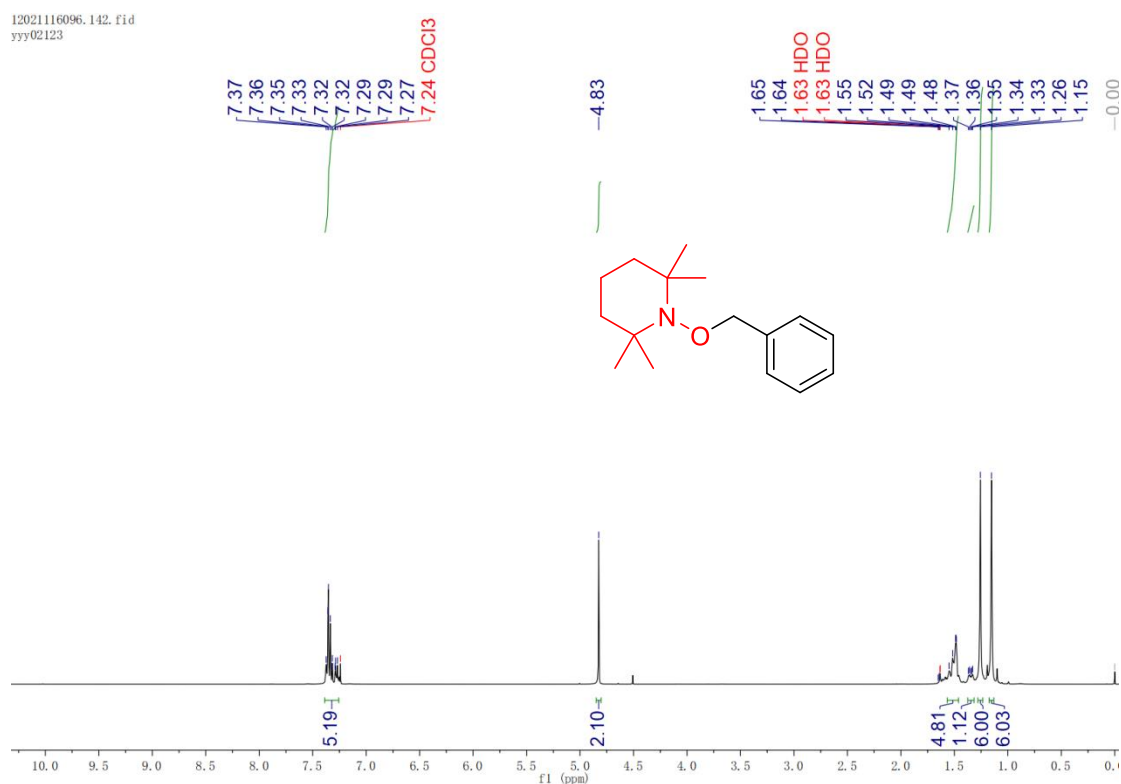

$^1\text{H-NMR}$  (400 MHz, Chloroform-*d*) Spectra of **10**

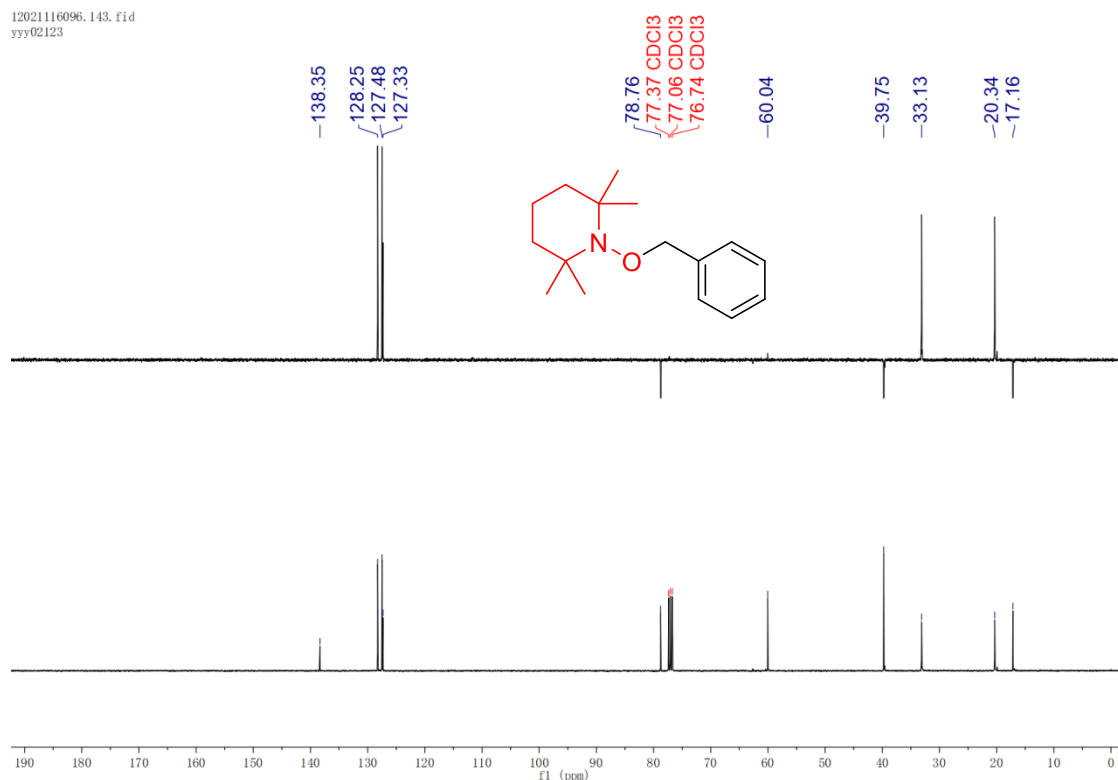

**$^{13}\text{C}$ -NMR (100 MHz, Chloroform-*d*) Spectra of 10**

#### 4. Isotope labeling experiments

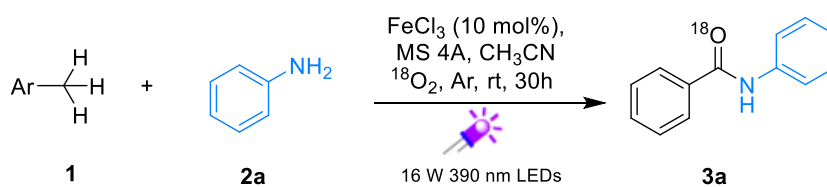

In the glove box, the standard reaction was performed according to general procedure, with toluene **1** (3.0 mmol, 10.0 equiv), amine **2a** (0.3 mmol, 1.0 equiv) and FeCl<sub>3</sub> (10 mol%, 0.01mmol) in MeCN (3.0 mL, 0.1 M) and in the presence of 4A molecular sieves were added to 20.0 mL reaction tube and the reaction tube was backfilled with <sup>18</sup>O<sub>2</sub>. After thirty hours the reaction was filtered over a short plug of silica and analyzed by GC-MS.

MS Formula Results: + Scan (0.266 min) Sub (yyy02133.d)

| m/z      | Ion                | Formula                                 | Abundance |
|----------|--------------------|-----------------------------------------|-----------|
| 200.0952 | (M+H) <sup>+</sup> | C <sub>13</sub> H <sub>12</sub> N [18O] | 2493.6    |

  

| Best                                | Formula (M)                             | Ion Formula                             | Score | Cross Score | Calc m/z | Diff (ppm) | Mass Match | Abund Match | Spacing Match |
|-------------------------------------|-----------------------------------------|-----------------------------------------|-------|-------------|----------|------------|------------|-------------|---------------|
| <input checked="" type="checkbox"/> | C <sub>13</sub> H <sub>11</sub> N [18O] | C <sub>13</sub> H <sub>12</sub> N [18O] | 46.84 |             | 200.0956 | 2.02       | 98.35      | 0           | 0             |

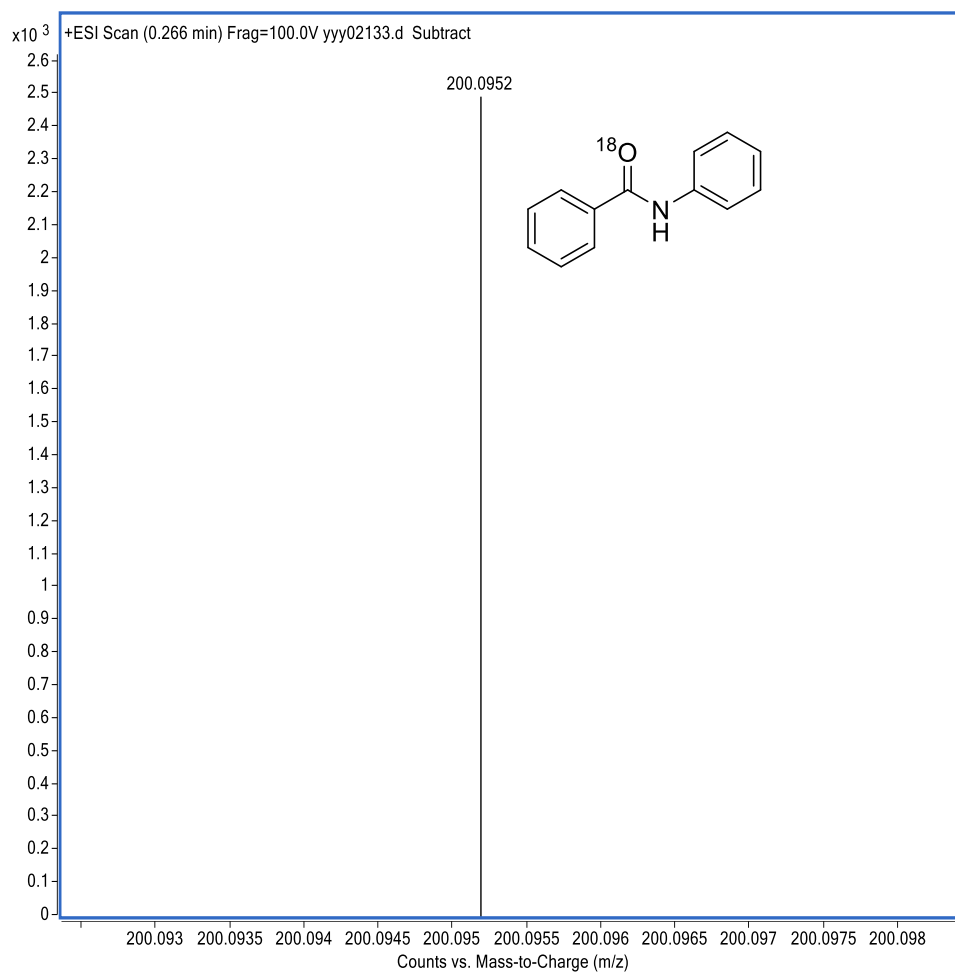

Figure S3 HRMS of *N*-phenylbenzamide-<sup>18</sup>O

## 6 $^1\text{H}$ NMR and $^{13}\text{C}$ NMR Spectra of 3a-3y, 5a-5t, 6a-6c, 7a-7n and 9.

12021116096.260.fid  
yyy02021-2

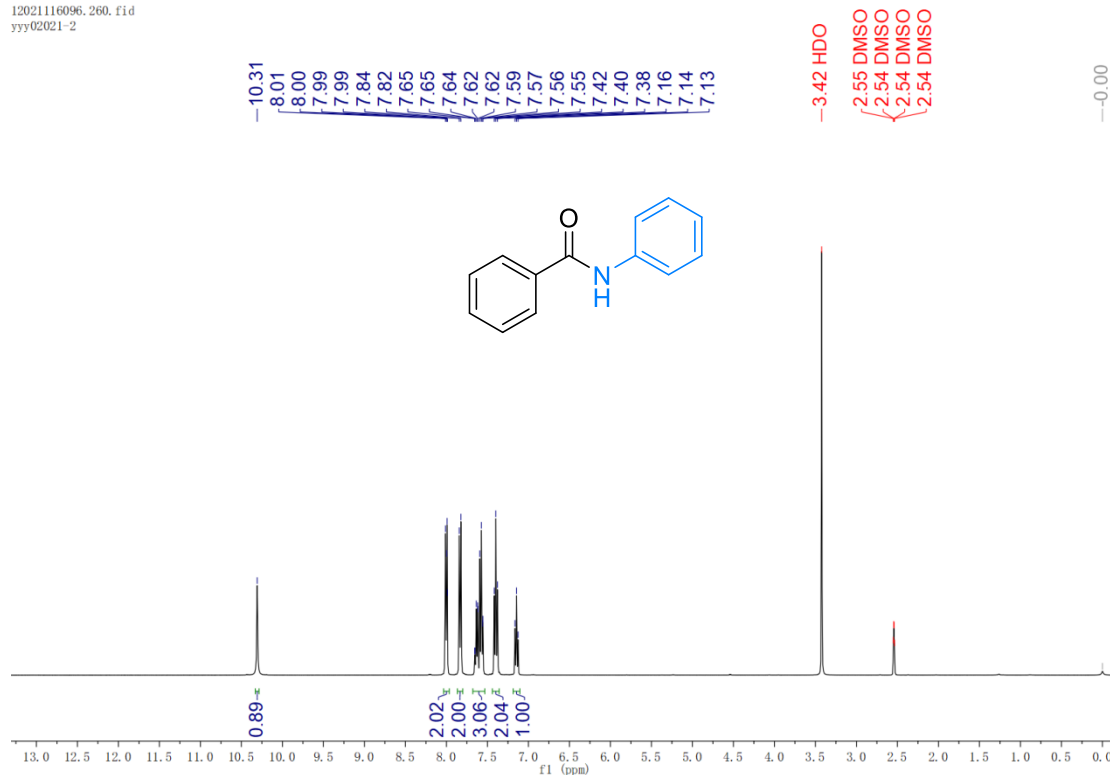

$^1\text{H}$ -NMR (400 MHz,  $\text{DMSO}-d_6$ ) Spectra of compound 3a

12021116096.261.fid  
yyy02021-2

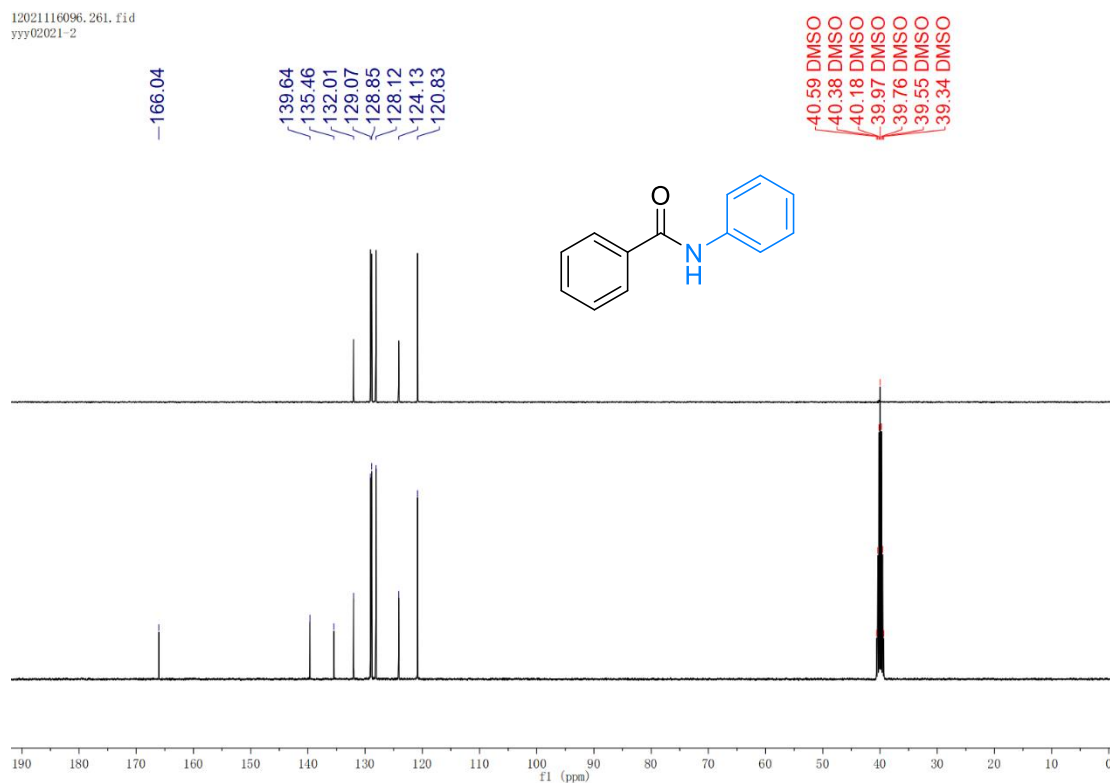

$^{13}\text{C}$ -NMR (100 MHz,  $\text{DMSO}-d_6$ ) Spectra of compound 3a

12021116096.69.fid  
yyy02028

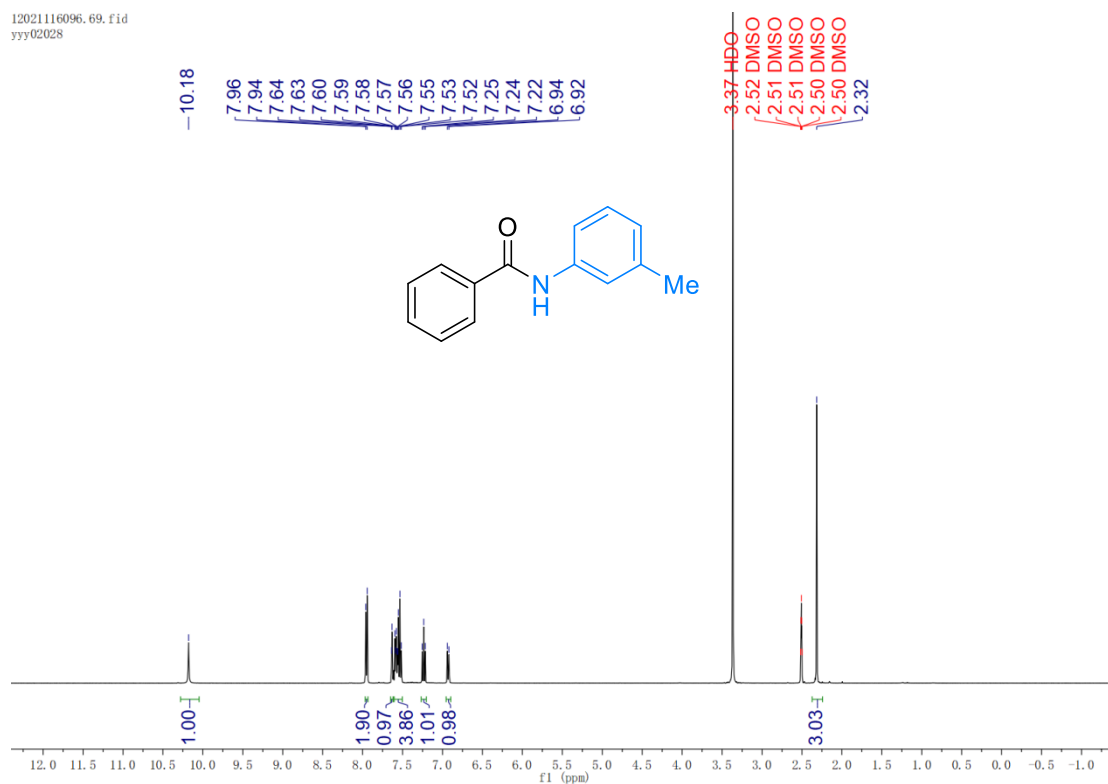

### <sup>1</sup>H-NMR (400 MHz, DMSO-*d*<sub>6</sub>) Spectra of compound 3b

12021116096.70.fid  
yyy02028

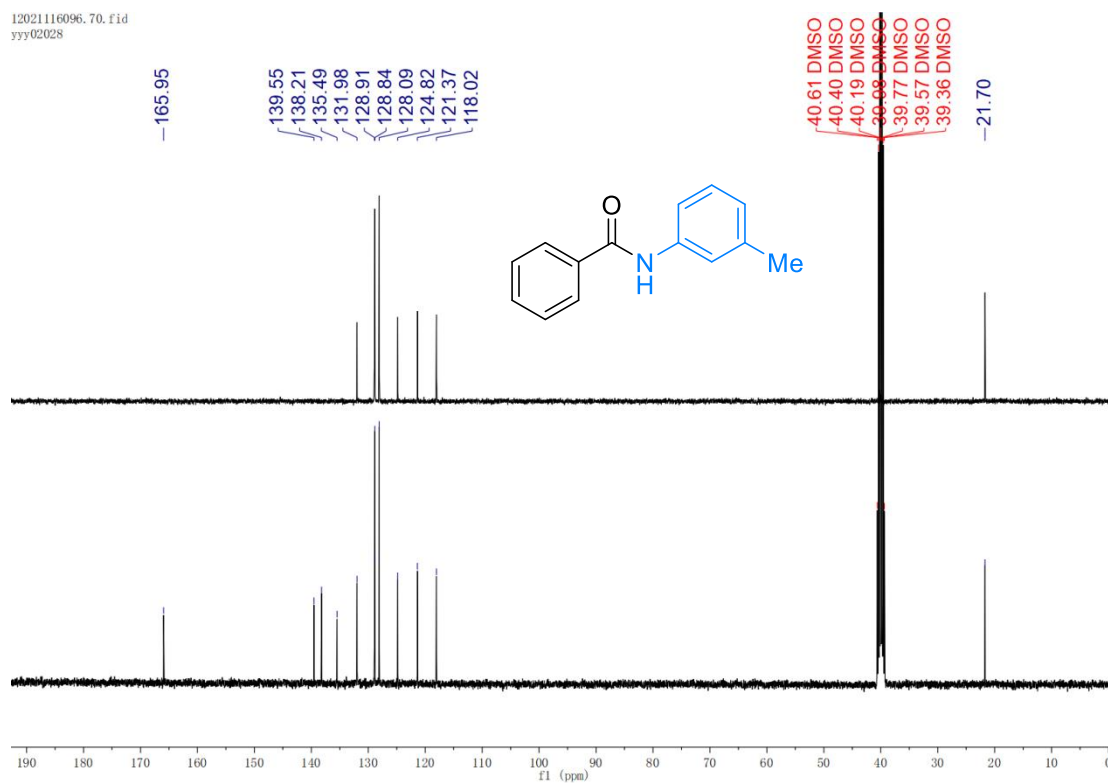

### <sup>13</sup>C-NMR (100 MHz, DMSO-*d*<sub>6</sub>) Spectra of compound 3b

12021116096.272.fid  
YYY02025

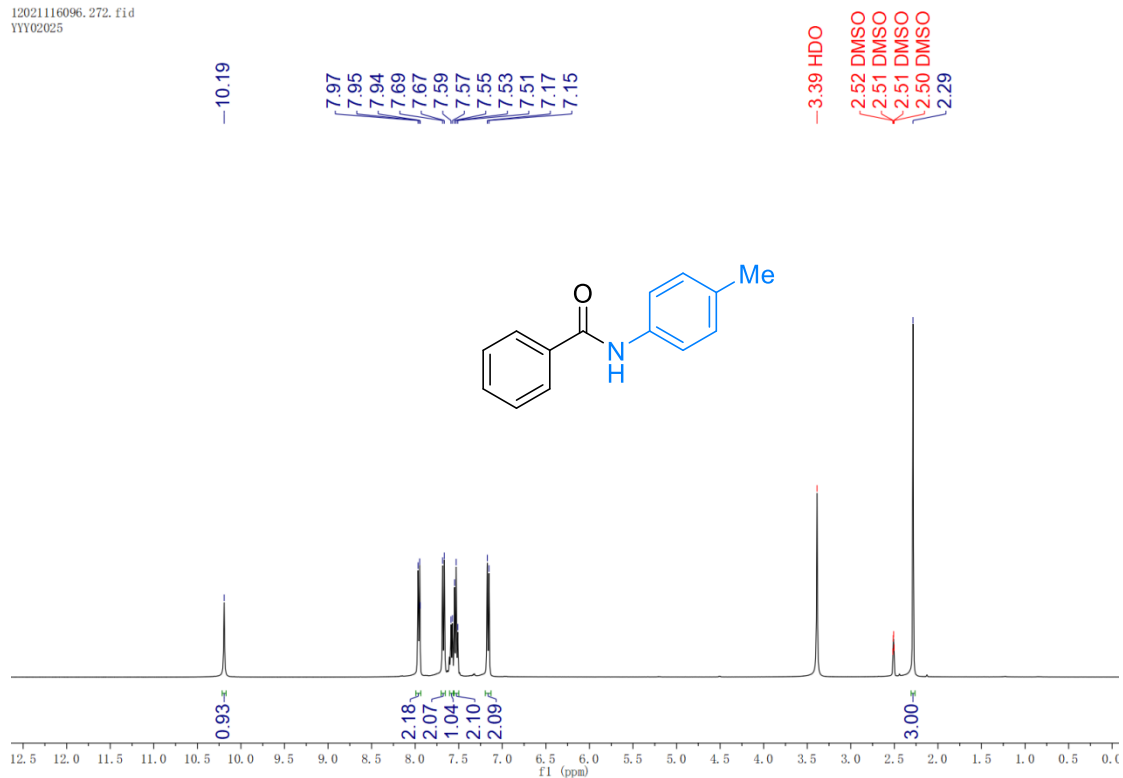

### <sup>1</sup>H-NMR (400 MHz, DMSO-*d*<sub>6</sub>) Spectra of compound 3c

12021116096.273.fid  
YYY02025

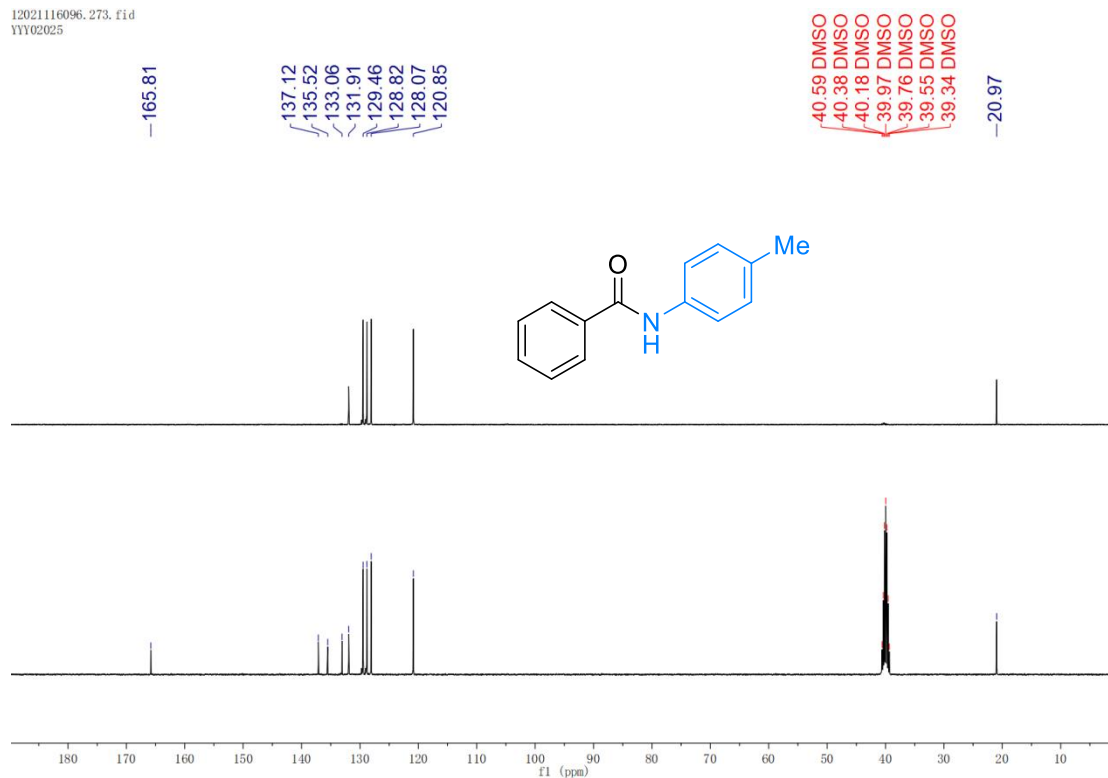

### <sup>13</sup>C-NMR (100 MHz, DMSO-*d*<sub>6</sub>) Spectra of compound 3c

12021116096.278.fid  
YY02034

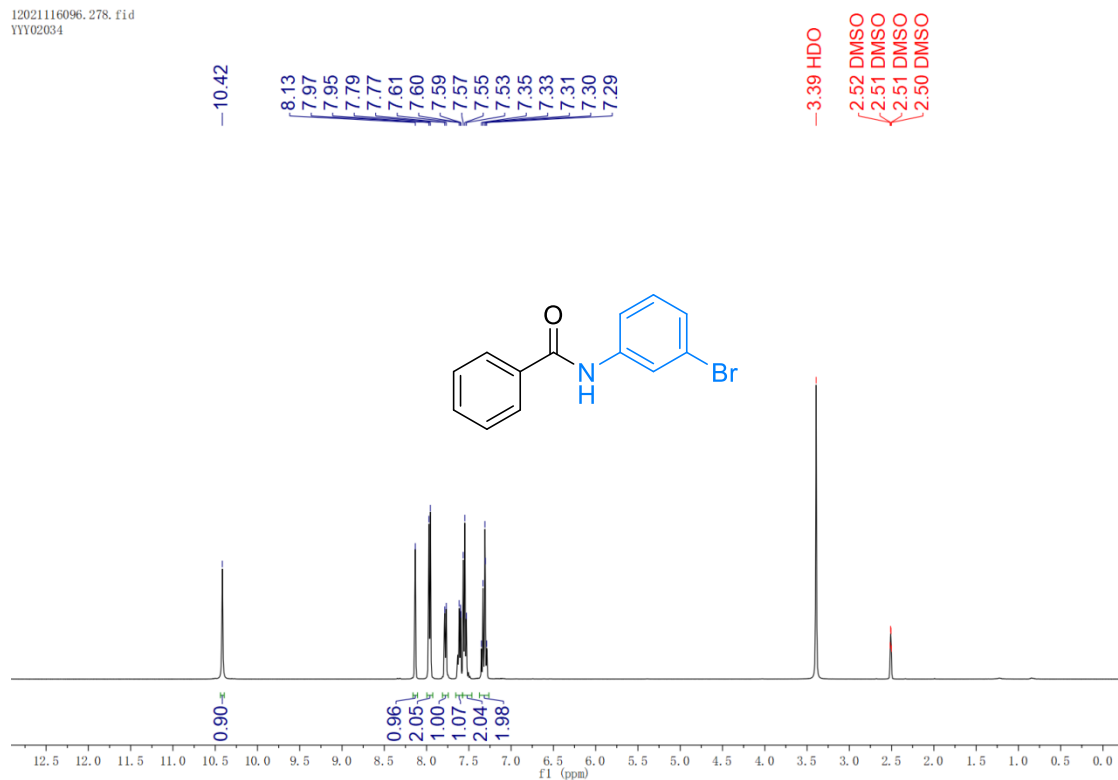

### <sup>1</sup>H-NMR (400 MHz, DMSO-*d*<sub>6</sub>) Spectra of compound 3d

12021116096.279.fid  
YY02034

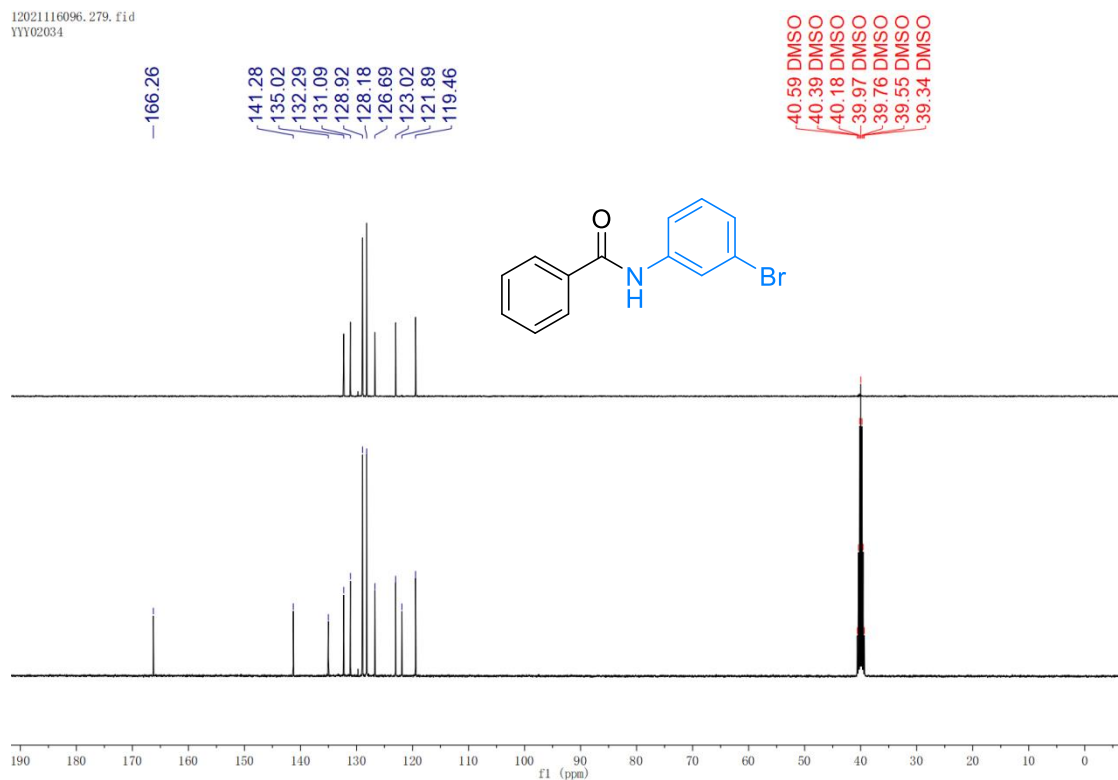

### <sup>13</sup>C-NMR (100 MHz, DMSO-*d*<sub>6</sub>) Spectra of compound 3d

12021116096.79.fid  
yyy02022

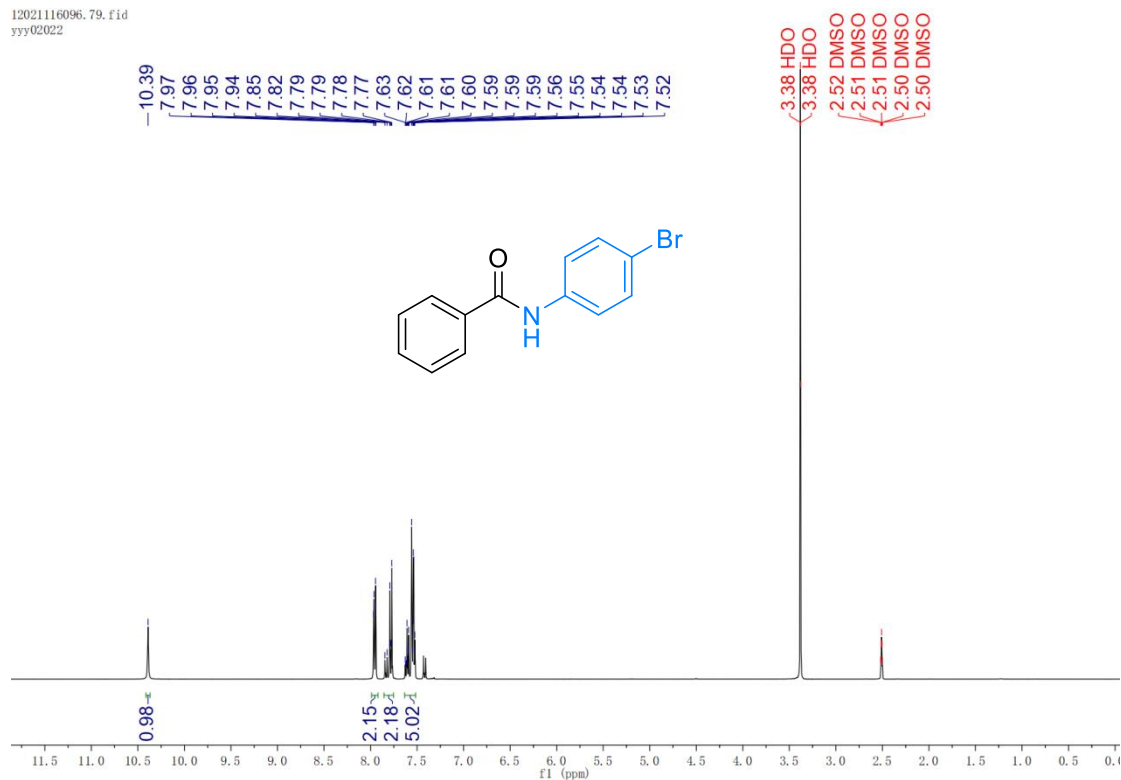

### <sup>1</sup>H-NMR (400 MHz, DMSO-*d*<sub>6</sub>) Spectra of compound 3e

12021116096.80.fid  
yyy02022

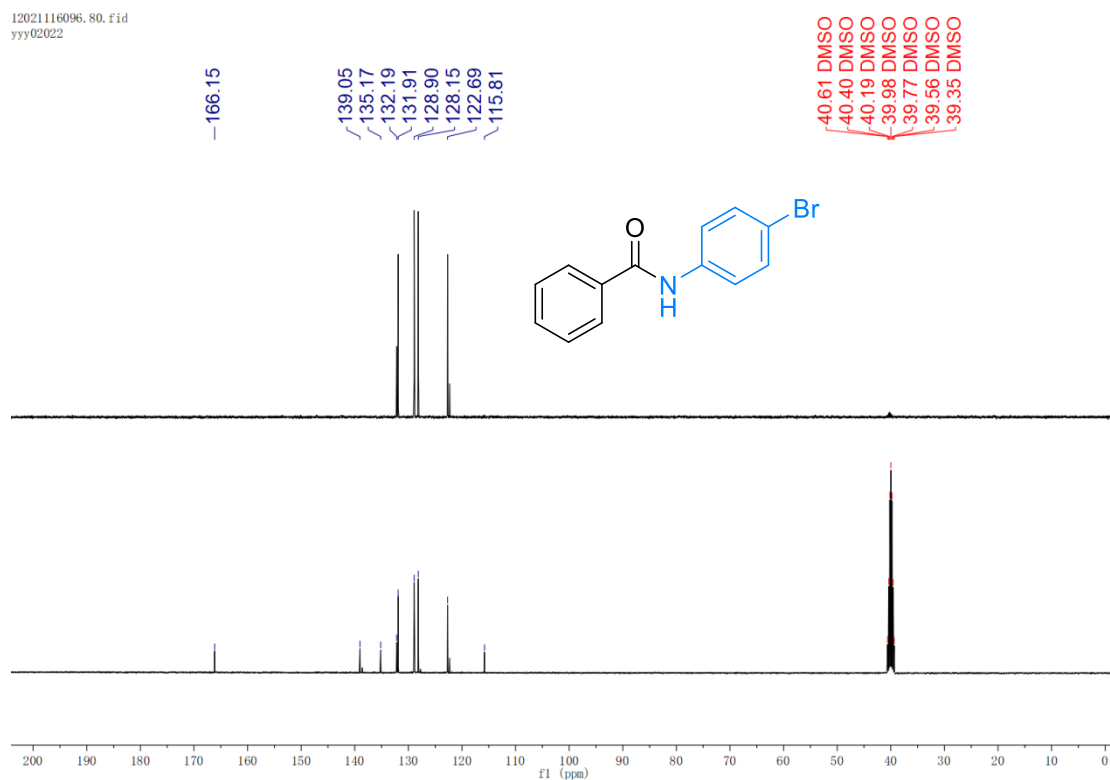

### <sup>13</sup>C-NMR (100 MHz, DMSO-*d*<sub>6</sub>) Spectra of compound 3e



12021116096.66.fid  
yyy02035

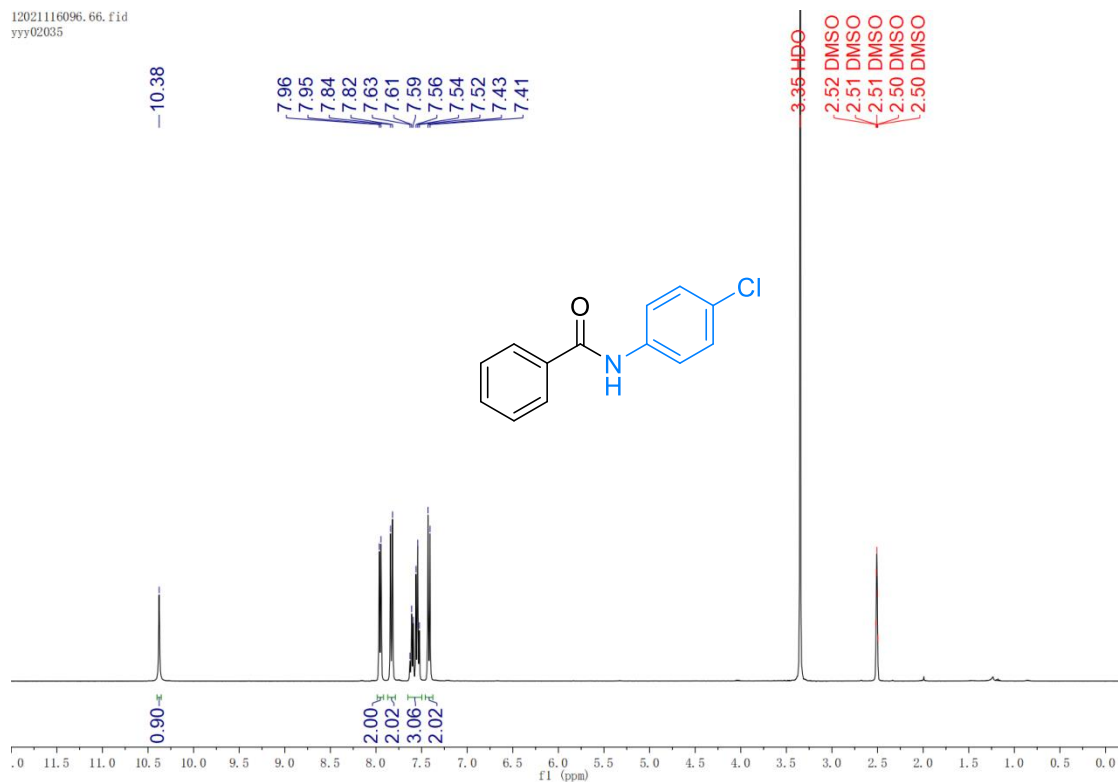

### <sup>1</sup>H-NMR (400 MHz, DMSO-*d*<sub>6</sub>) Spectra of compound 3f

12021116096.67.fid  
yyy02035

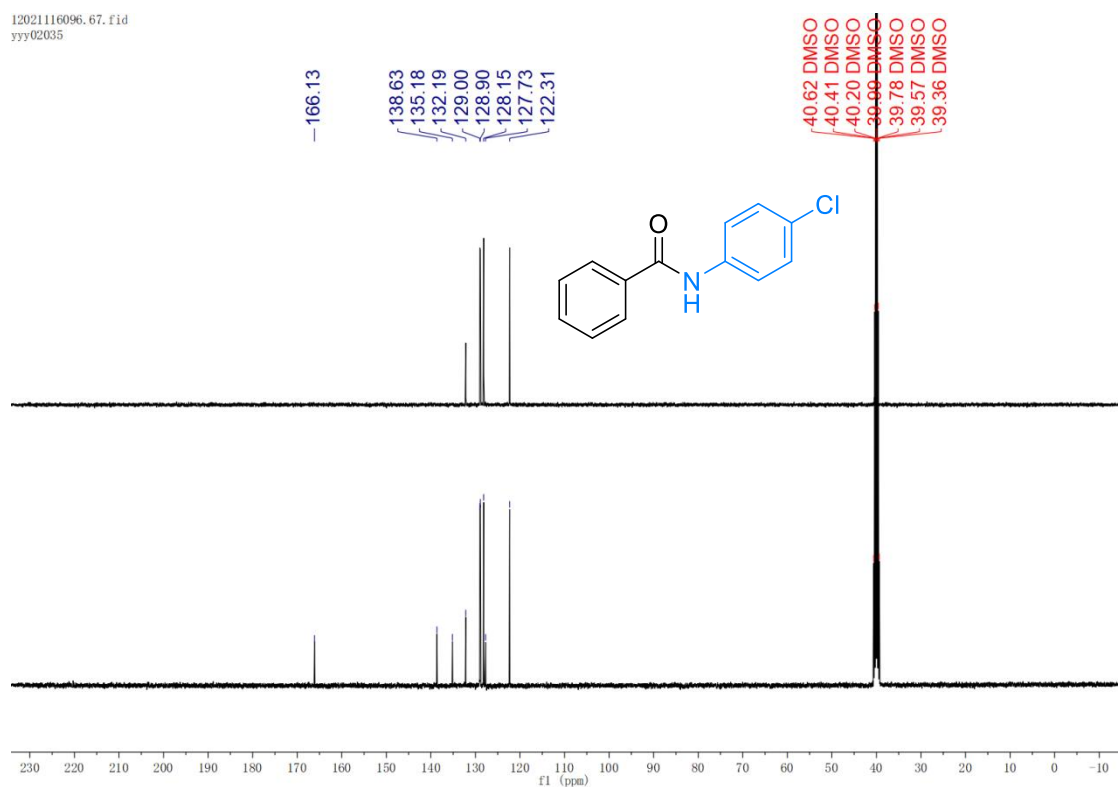

### <sup>13</sup>C-NMR (100 MHz, DMSO-*d*<sub>6</sub>) Spectra of compound 3f

12021116096.72.fid  
yyy02032

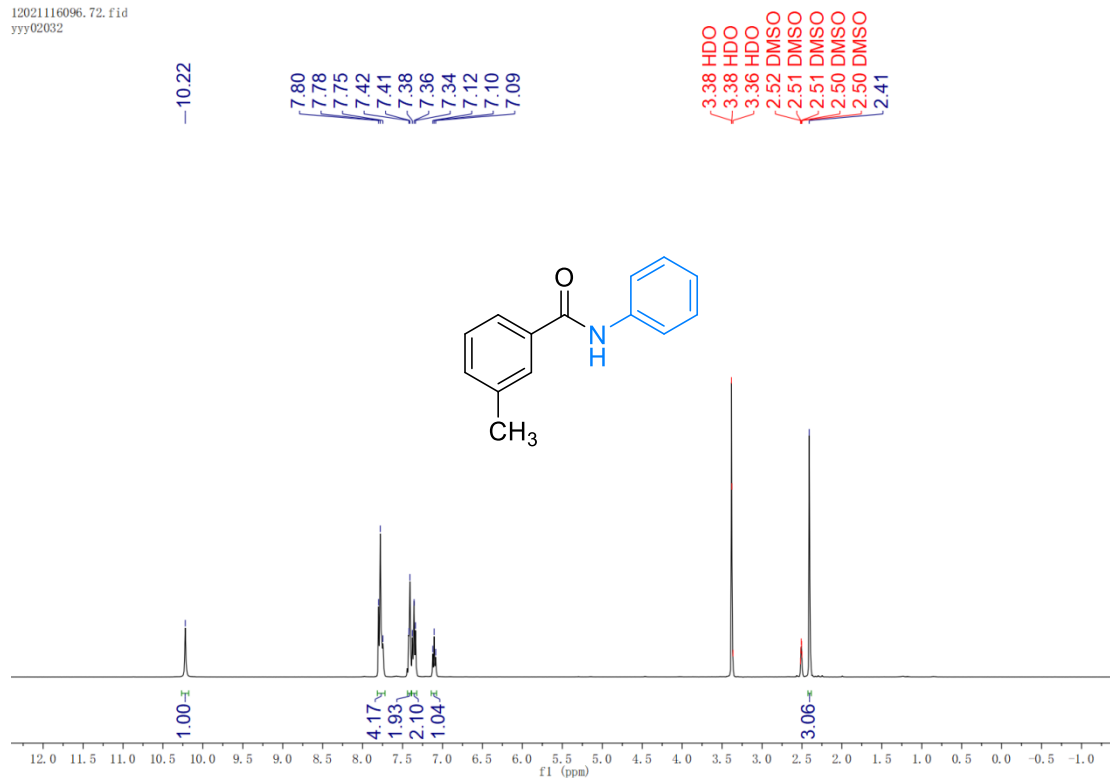

### <sup>1</sup>H-NMR (400 MHz, DMSO-*d*<sub>6</sub>) Spectra of compound 3g

12021116096.73.fid  
yyy02032

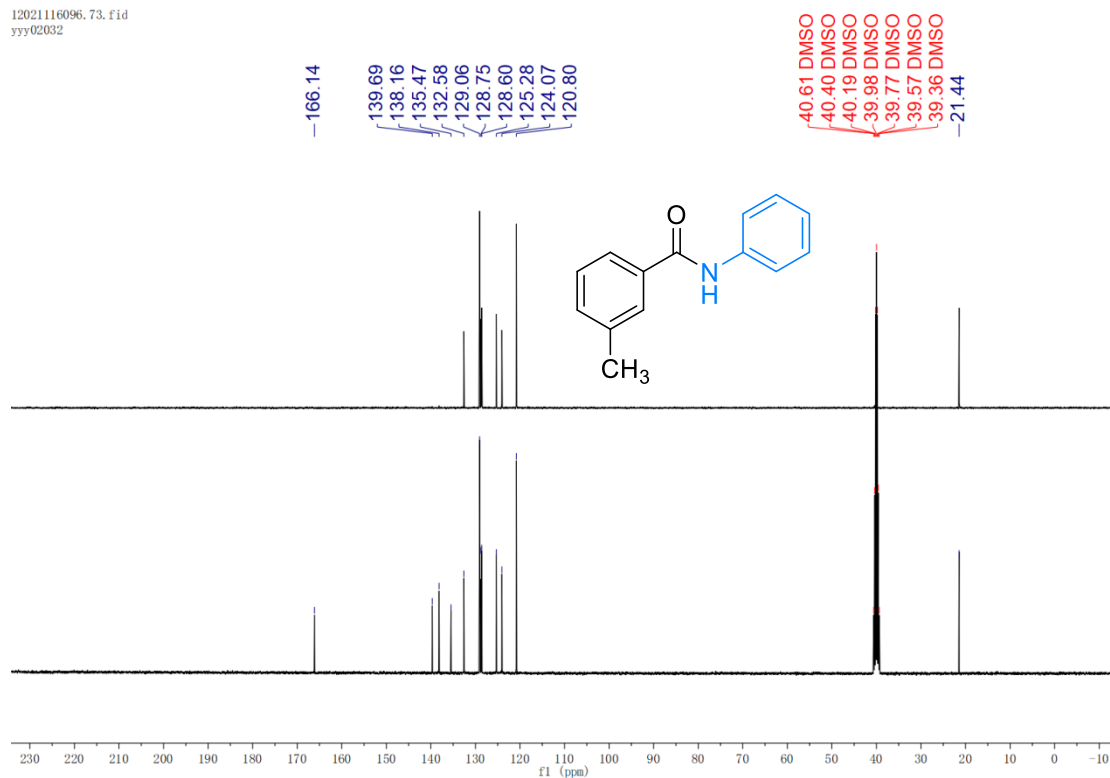

### <sup>13</sup>C-NMR (100 MHz, DMSO-*d*<sub>6</sub>) Spectra of compound 3g

12021116096.63.fid  
yyy02033

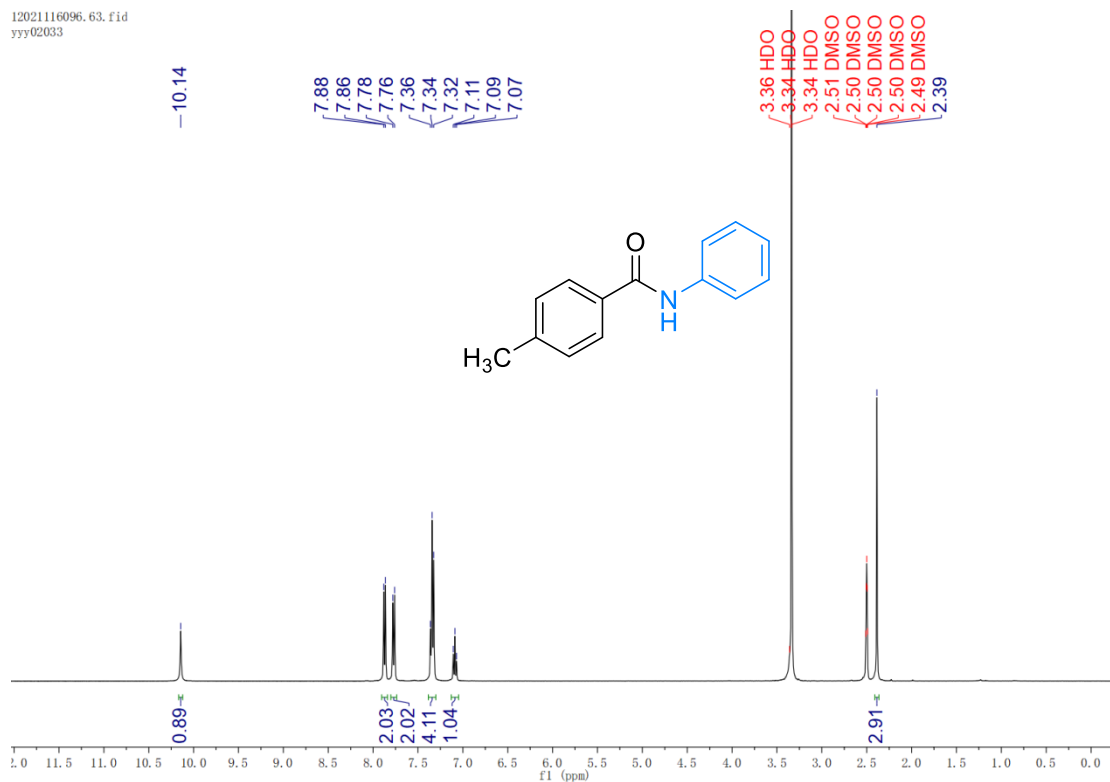

### <sup>1</sup>H-NMR (400 MHz, DMSO-*d*<sub>6</sub>) Spectra of compound 3h

12021116096.64.fid  
yyy02033

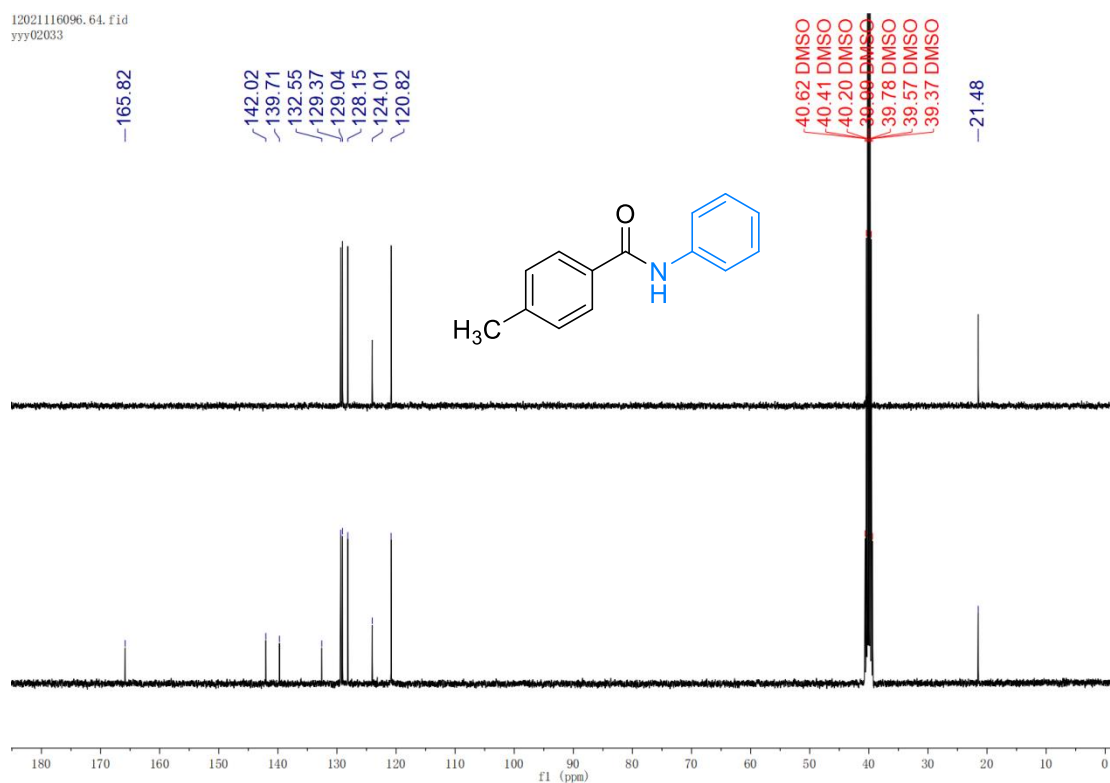

### <sup>13</sup>C-NMR (100 MHz, DMSO-*d*<sub>6</sub>) Spectra of compound 3h

12021116096.315.fid  
yyy02074

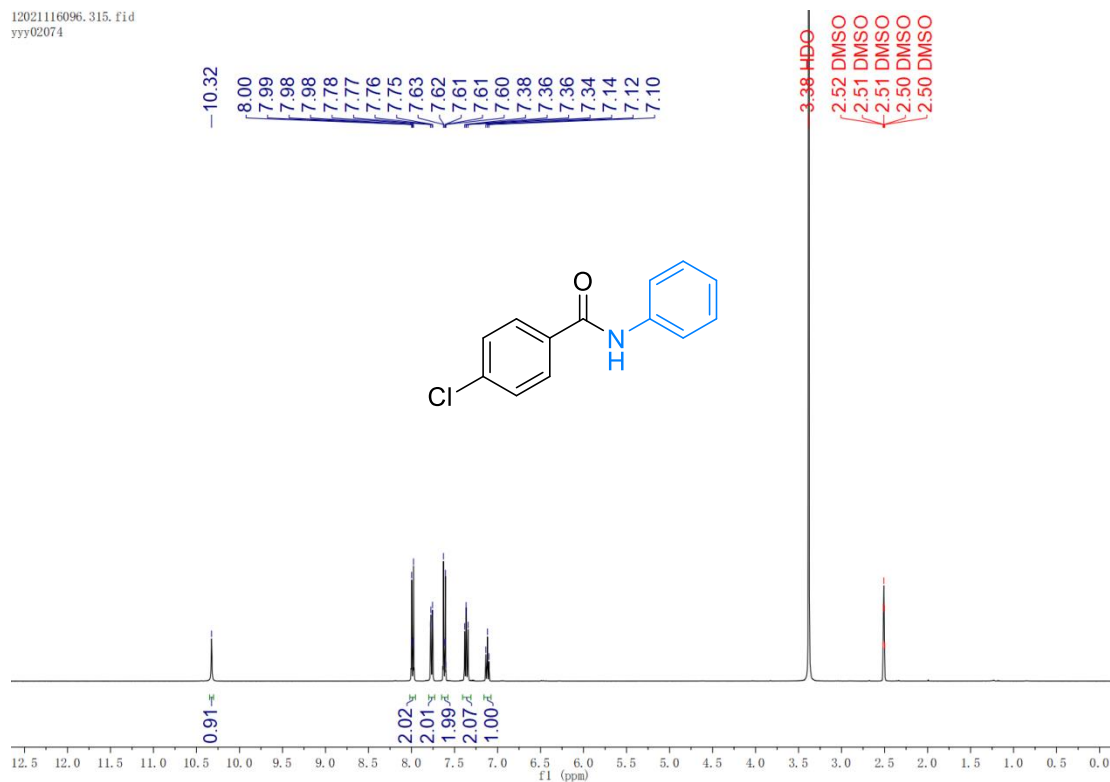

### <sup>1</sup>H-NMR (400 MHz, DMSO-*d*<sub>6</sub>) Spectra of compound 3i

12021116096.316.fid  
yyy02074

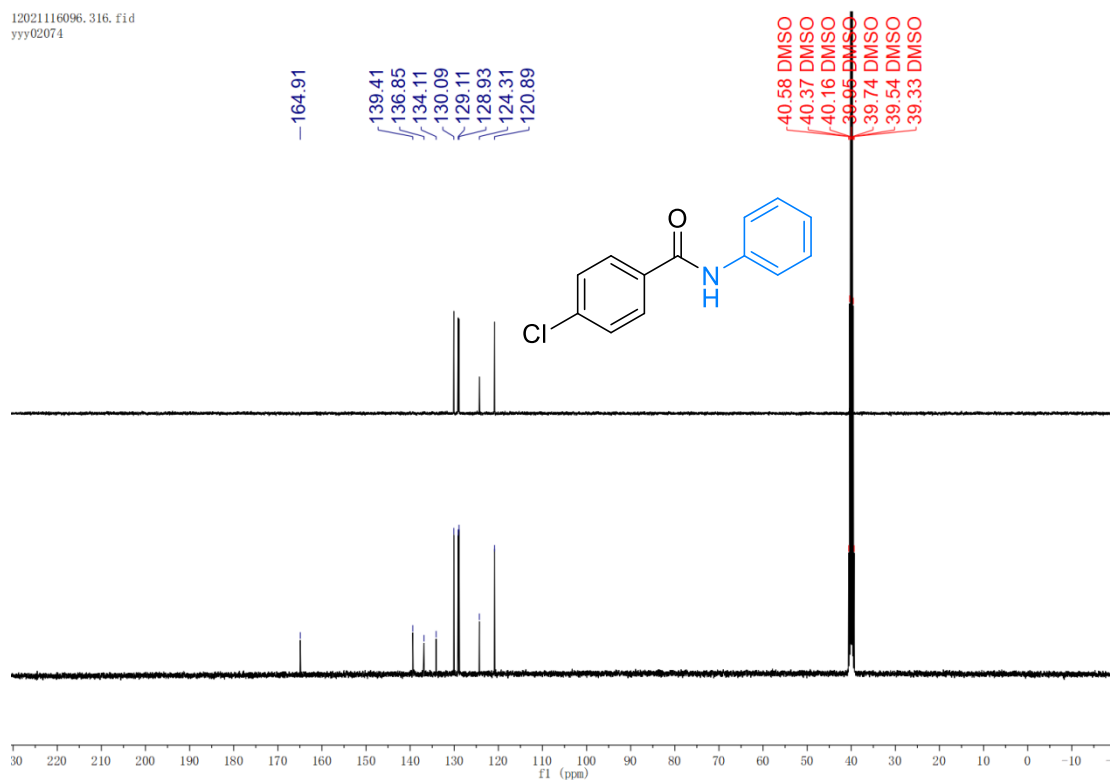

### <sup>13</sup>C-NMR ((100 MHz, DMSO-*d*<sub>6</sub>) Spectra of compound 3i

12021116096.111.fid  
yyy02075-2

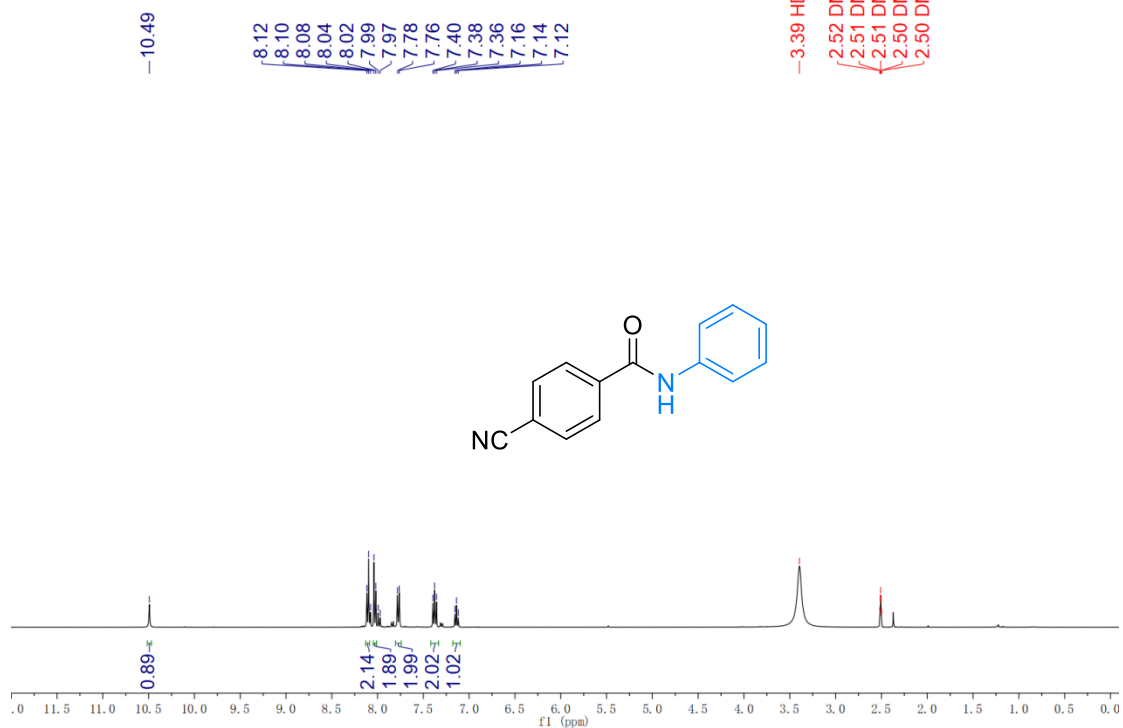

### <sup>1</sup>H-NMR (400 MHz, DMSO-*d*<sub>6</sub>) Spectra of compound 3j

12021116096.112.fid  
yyy02075-2

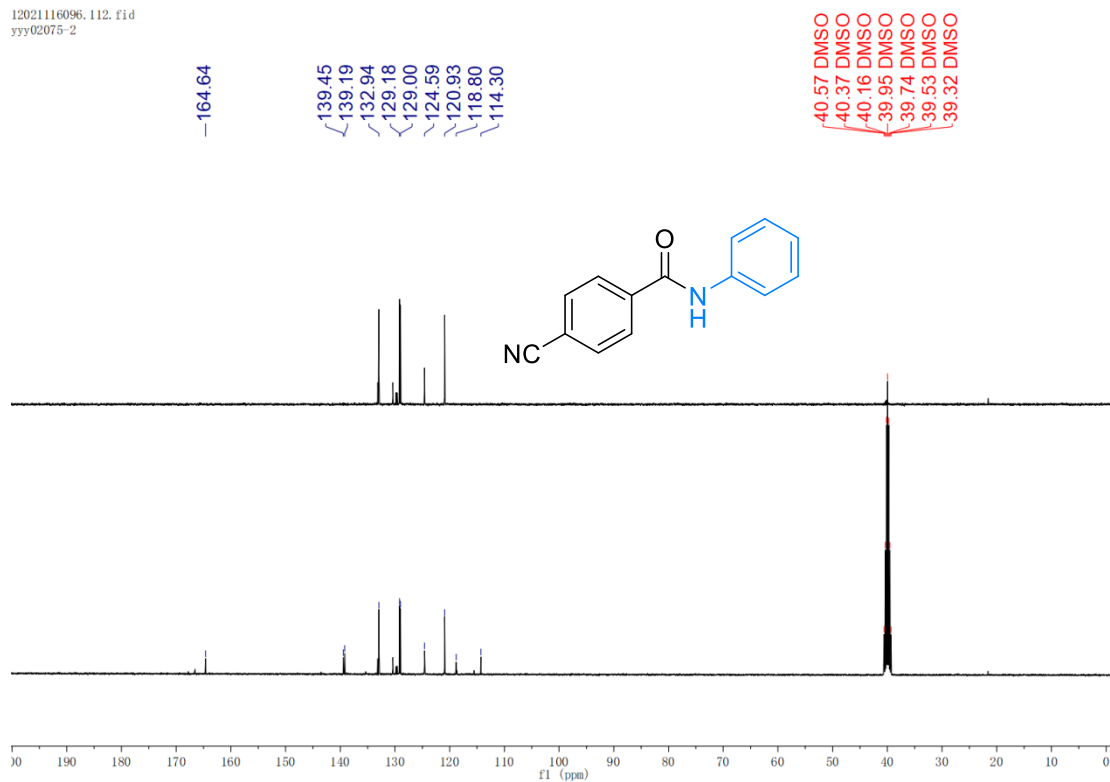

### <sup>13</sup>C-NMR (100 MHz, DMSO-*d*<sub>6</sub>) Spectra of compound 3j

12021116096.114. F1d  
YY02084

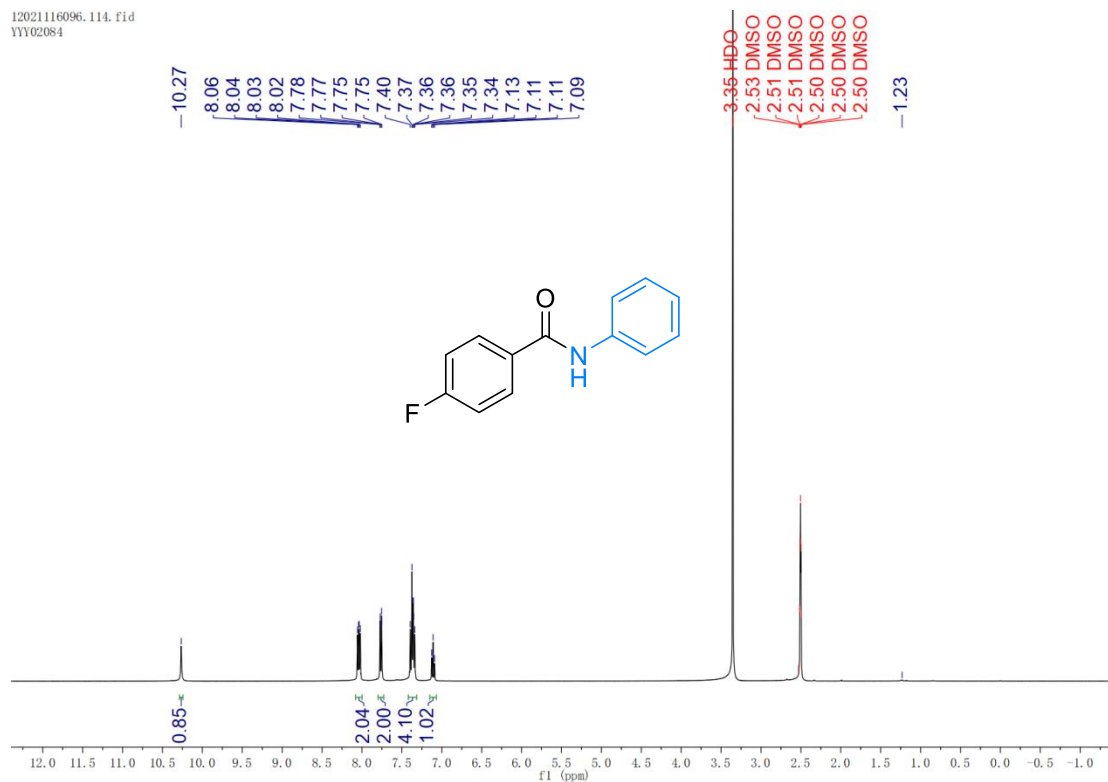

### <sup>1</sup>H-NMR (400 MHz, DMSO-*d*<sub>6</sub>) Spectra of compound 3k

12021116096.115. F1d  
YY02084

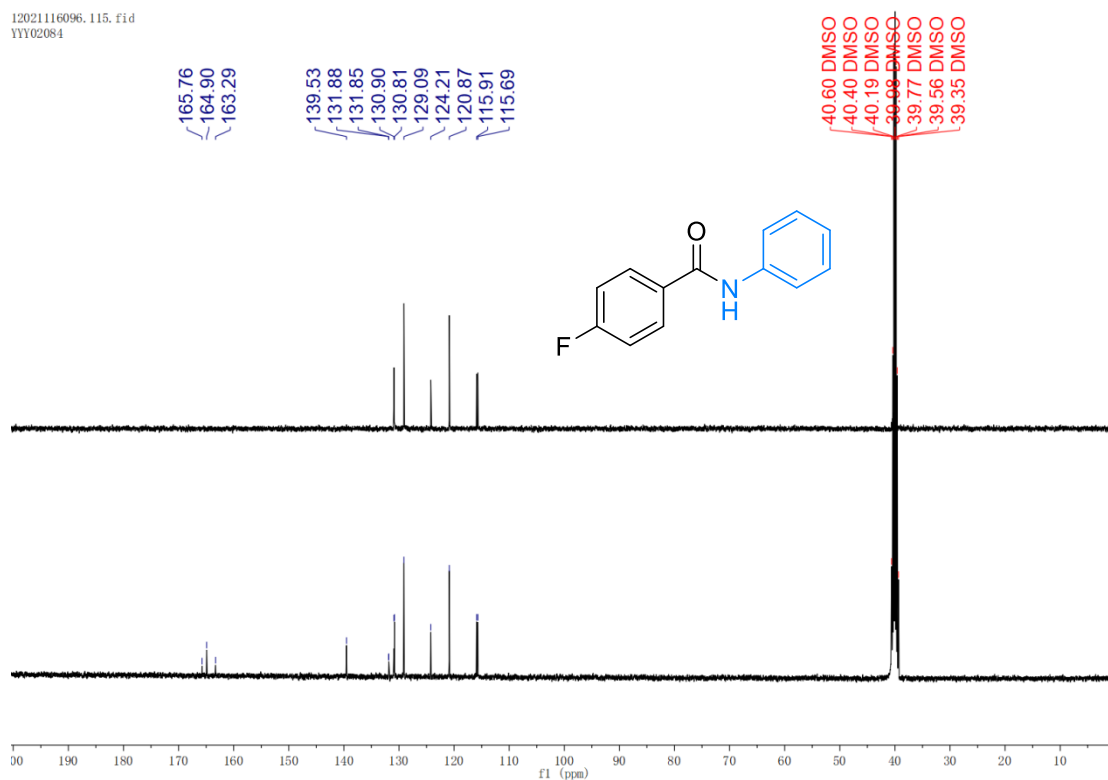

### <sup>13</sup>C-NMR (100 MHz, DMSO-*d*<sub>6</sub>) Spectra of compound 3k

12021116096.322.fid  
yyy02084

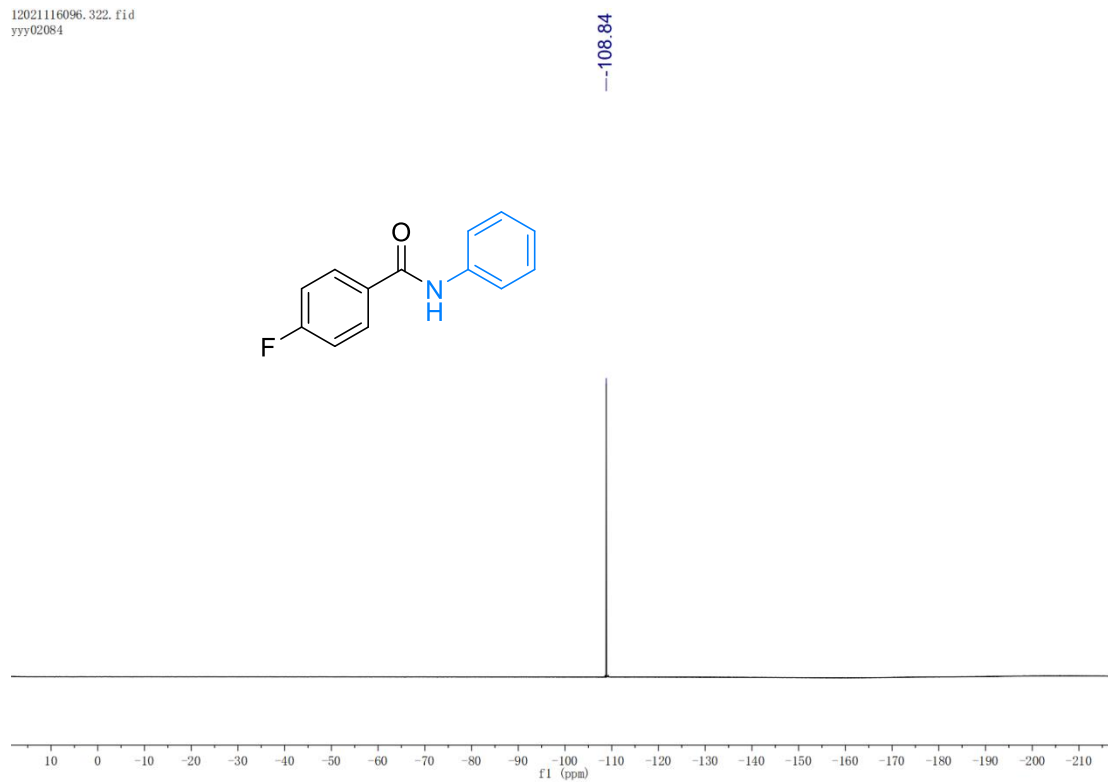

**$^{19}\text{F}$  NMR (376 MHz,  $\text{DMSO-}d_6$ ) Spectra of compound 3k**

12021116096.108.fid  
yyy02078

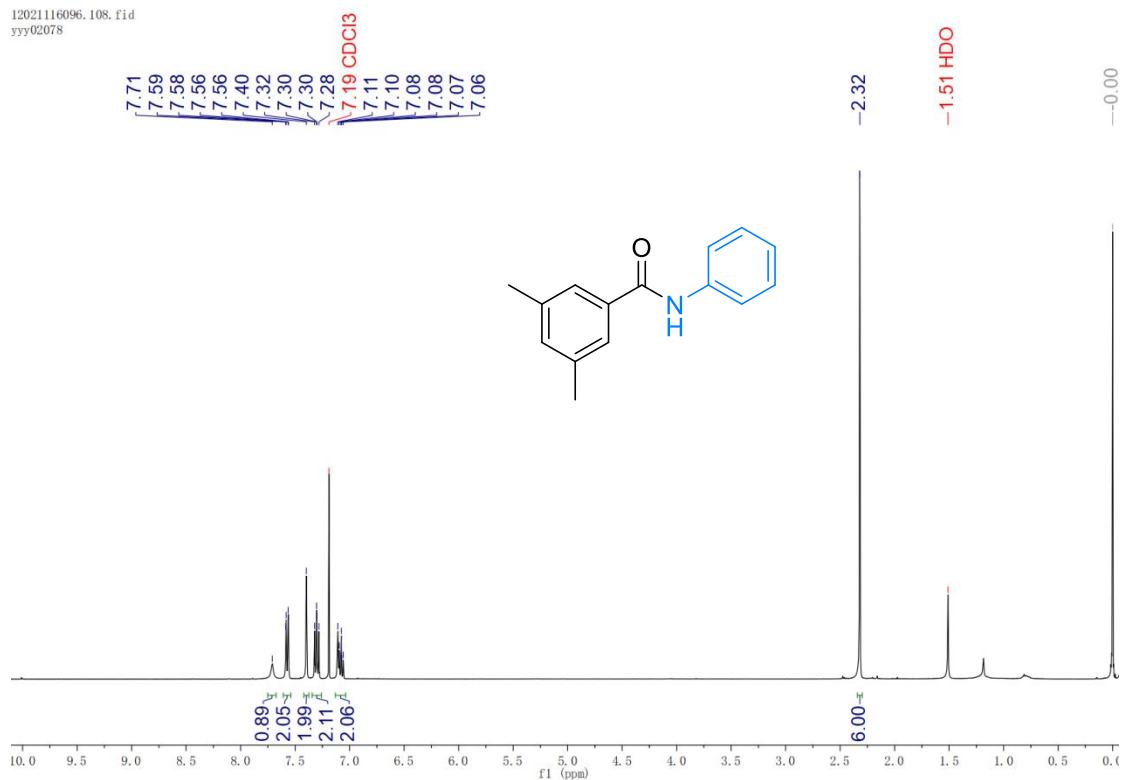

### <sup>1</sup>H-NMR (400 MHz, Chloroform-*d*) Spectra of compound 31

12021116096.109.fid  
yyy02078

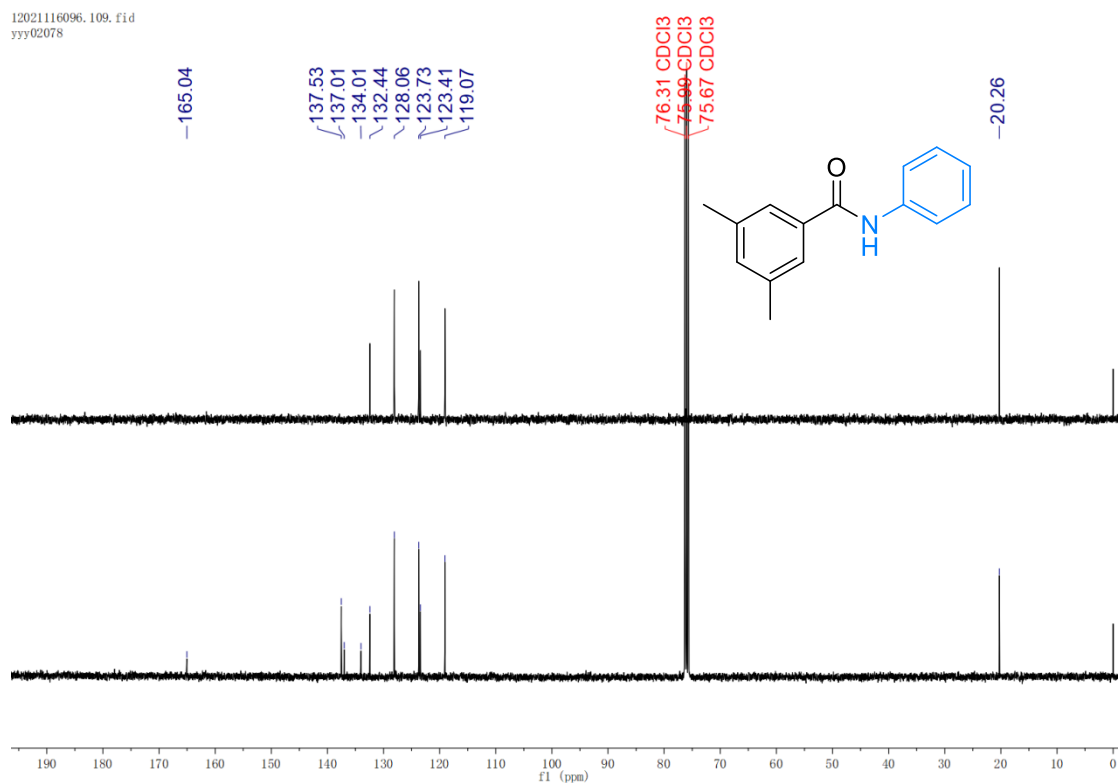

### <sup>13</sup>C-NMR (100 MHz, Chloroform-*d*) Spectra of compound 31



12021116096.90.fid

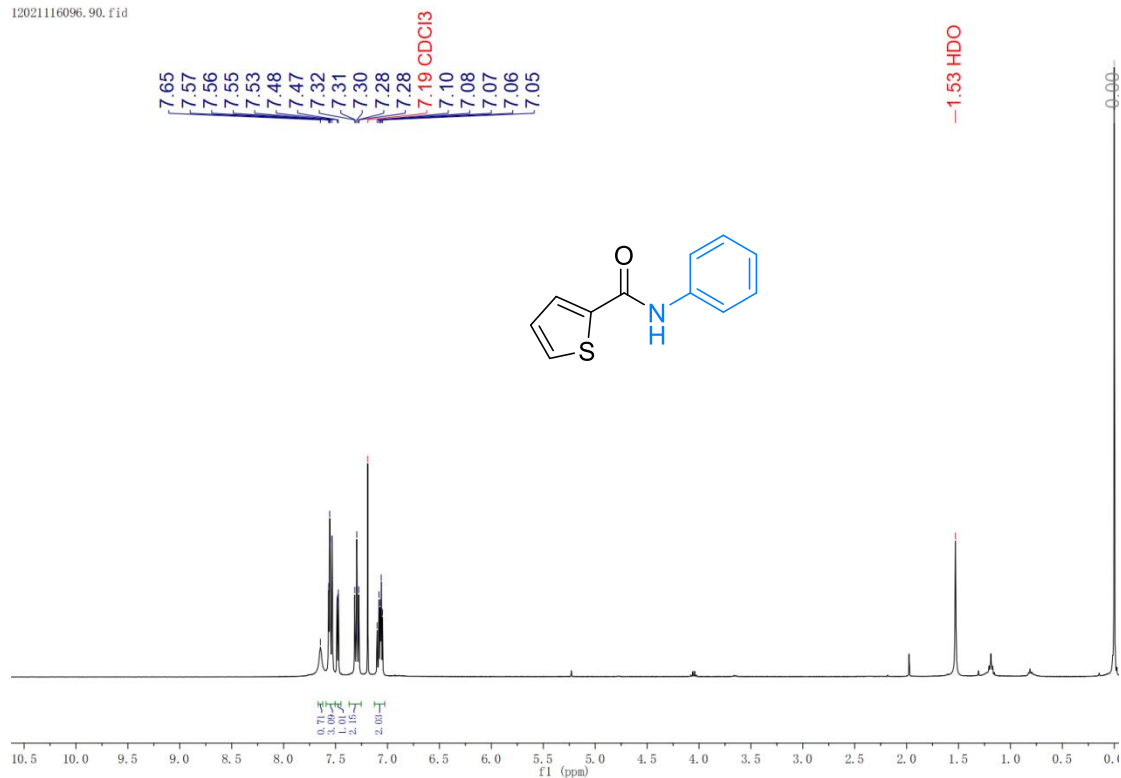

### <sup>1</sup>H-NMR (400 MHz, Chloroform-*d*) Spectra of compound 3m

12021116096.91.fid

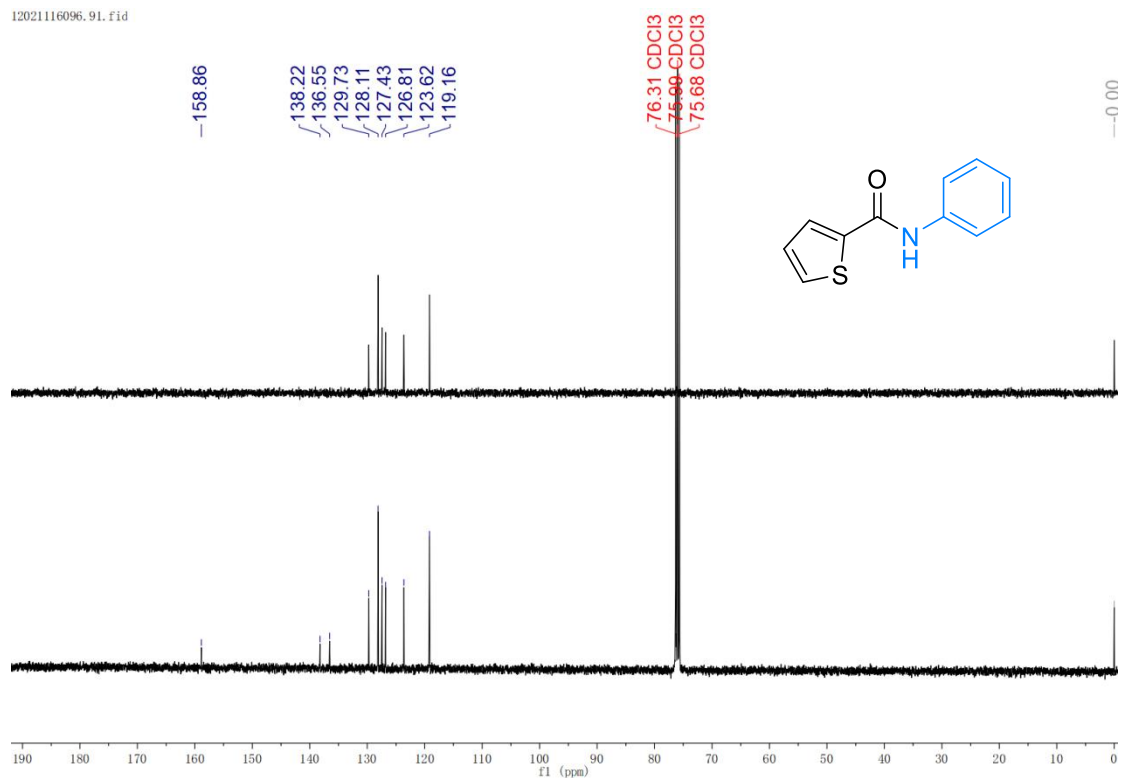

### <sup>13</sup>C-NMR (100 MHz, Chloroform-*d*) Spectra of compound 3m

12021116096.275.fid  
YY02027

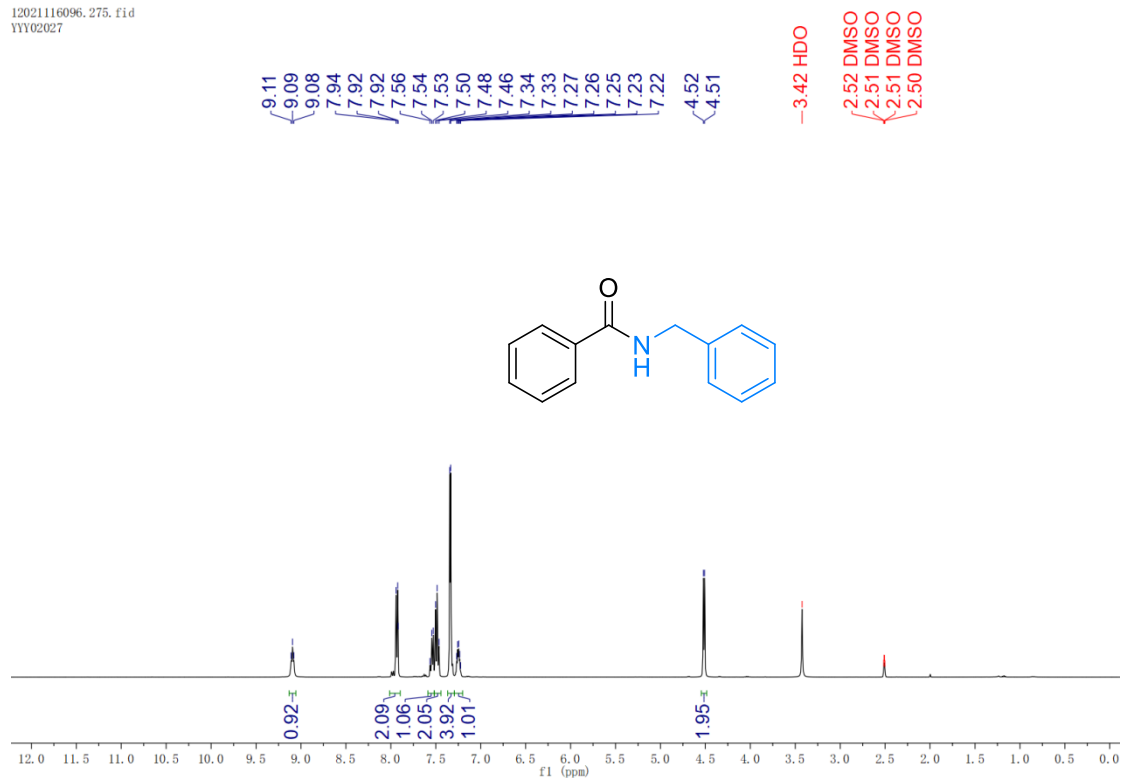

### <sup>1</sup>H-NMR (400 MHz, DMSO-*d*<sub>6</sub>) Spectra of compound 3n

12021116096.276.fid  
YY02027

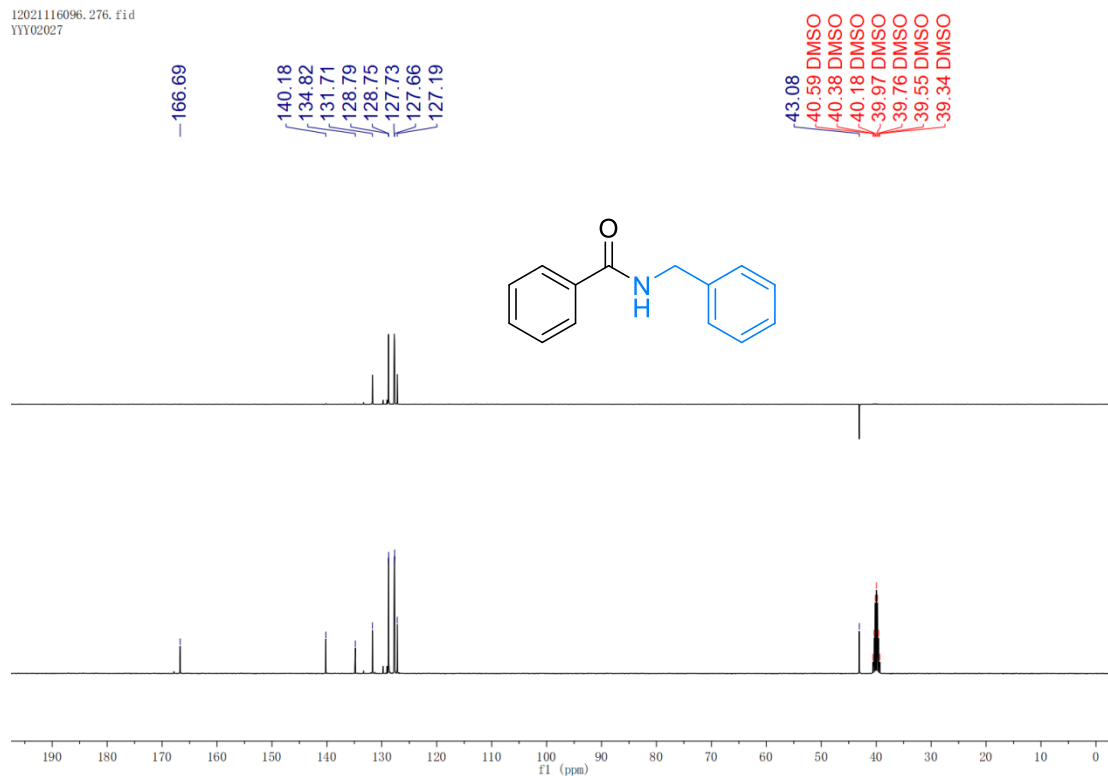

### <sup>13</sup>C-NMR (100 MHz, DMSO-*d*<sub>6</sub>) Spectra of compound 3n

12021116096.76.fid  
yyy02042

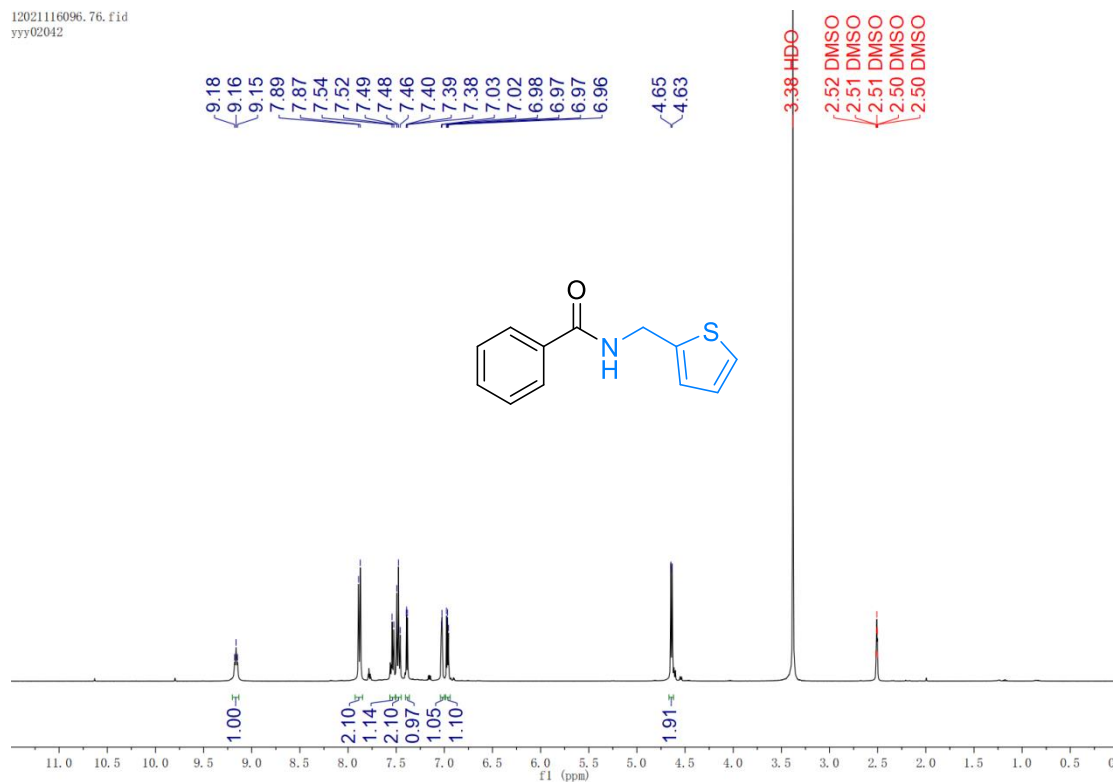

### <sup>1</sup>H-NMR (400 MHz, DMSO-*d*<sub>6</sub>) Spectra of compound 3o

12021116096.77.fid  
yyy02042

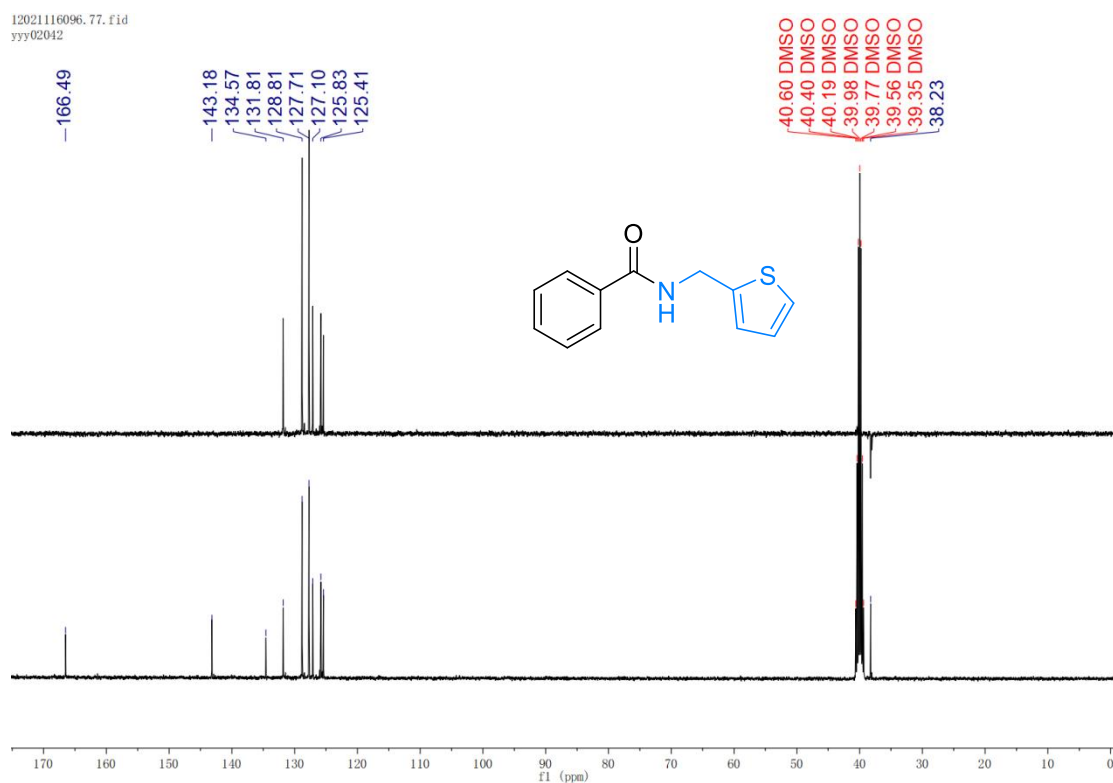

### <sup>13</sup>C-NMR (100 MHz, DMSO-*d*<sub>6</sub>) Spectra of compound 3o

12021116096.281.fid  
YY02030

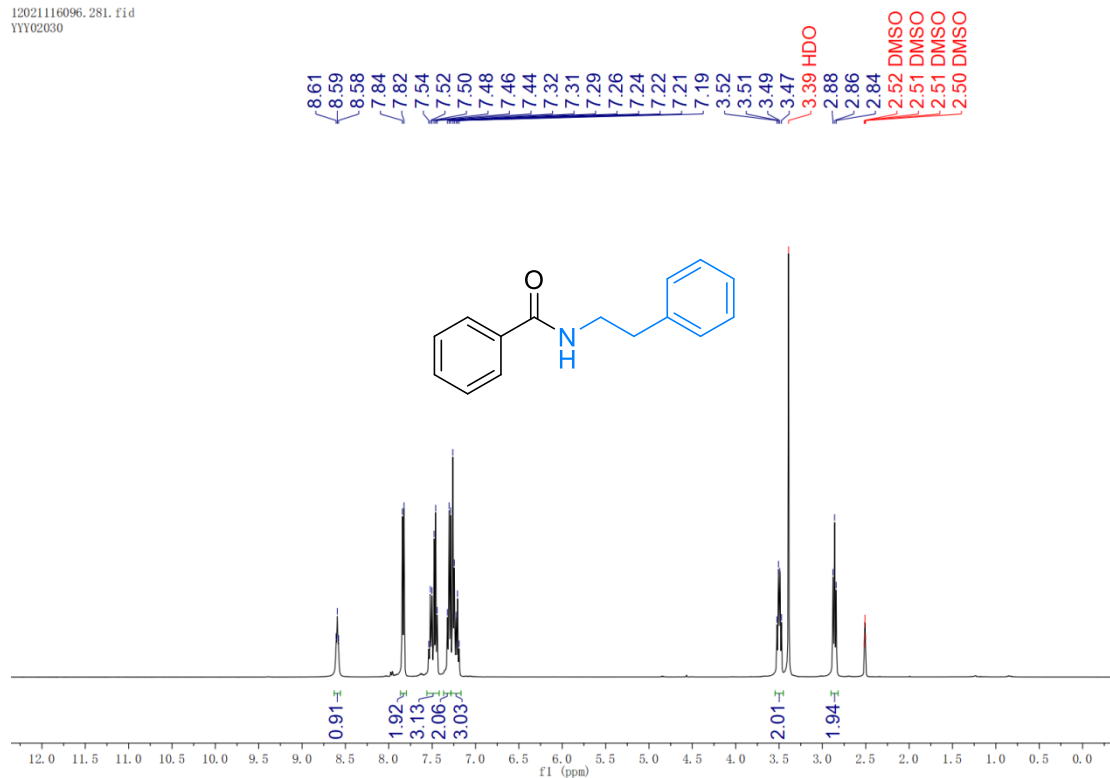

### <sup>1</sup>H-NMR (400 MHz, DMSO-*d*<sub>6</sub>) Spectra of compound 3p

12021116096.282.fid  
YY02030

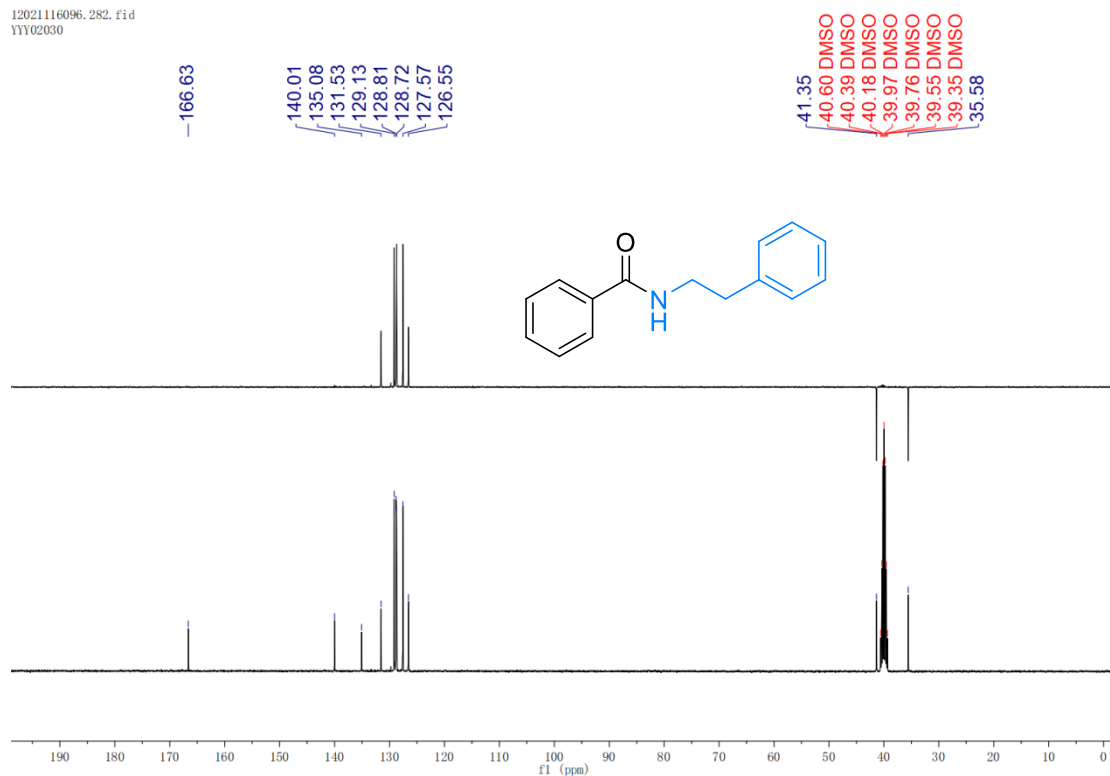

### <sup>13</sup>C-NMR (100 MHz, DMSO-*d*<sub>6</sub>) Spectra of compound 3p

12021116096.83.fid  
YYY02054

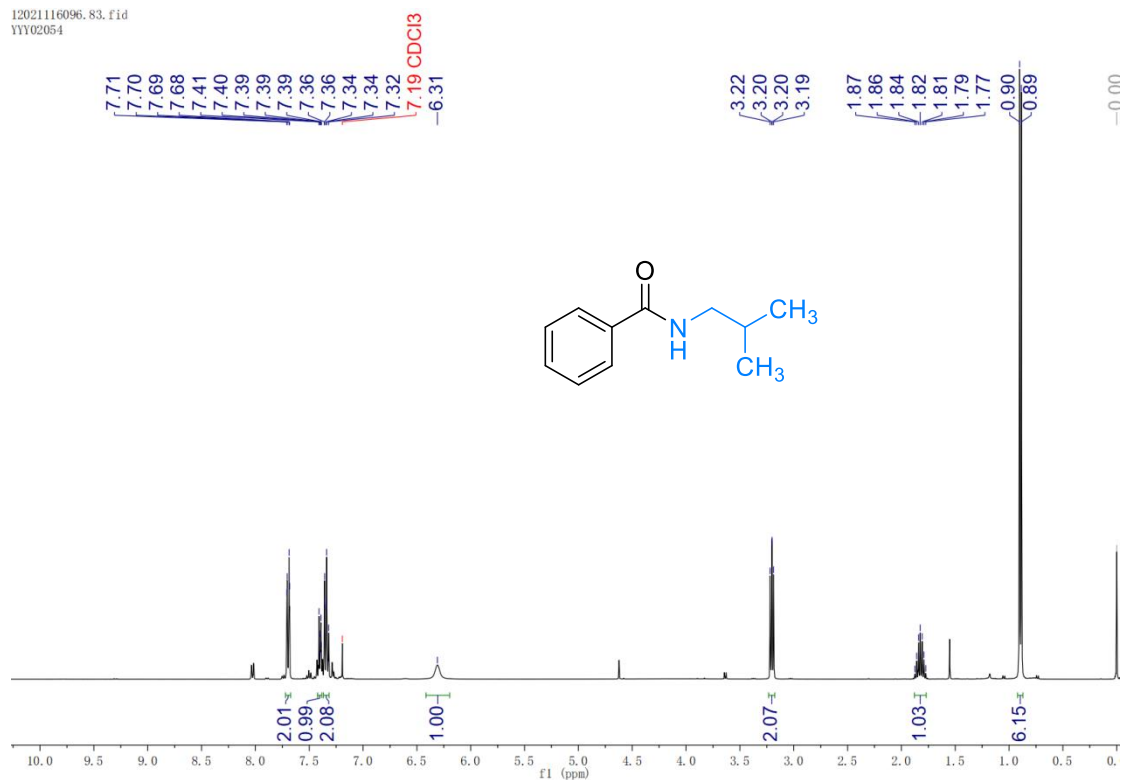

### <sup>1</sup>H-NMR (400 MHz, Chloroform-*d*) Spectra of compound 3q

12021116096.84.fid  
YYY02054

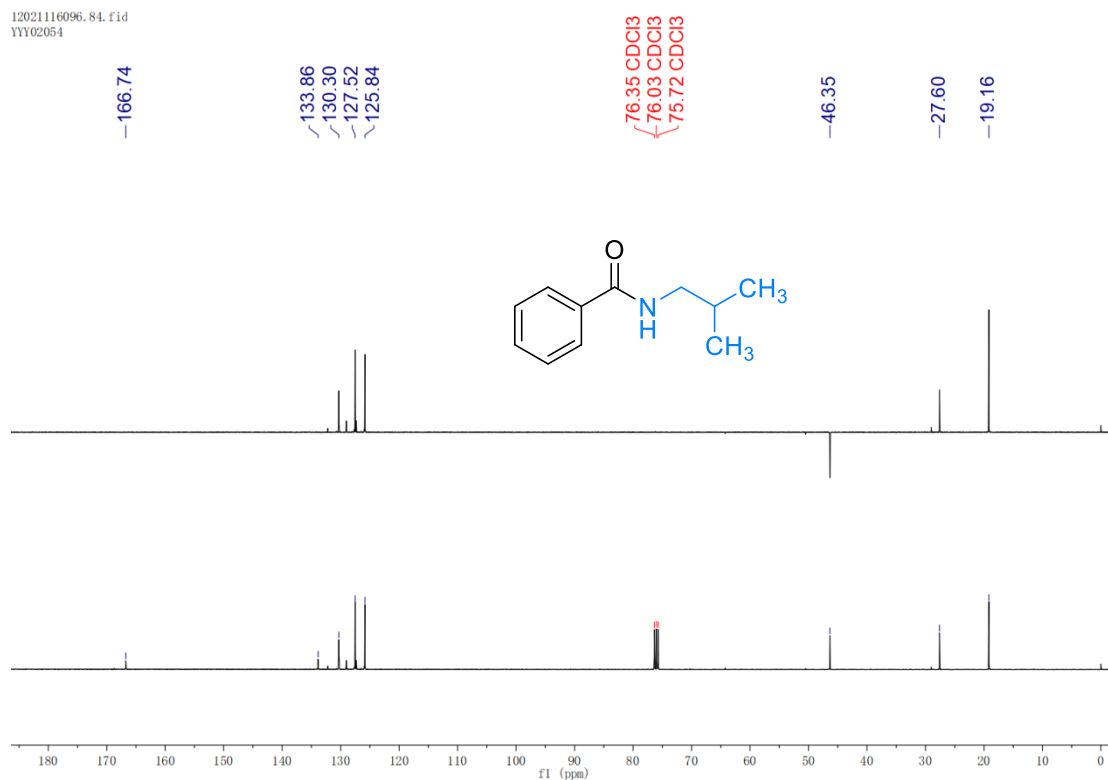

### <sup>13</sup>C-NMR (100 MHz, Chloroform-*d*) Spectra of compound 3q

12021116096.105.Fid  
yyy02072

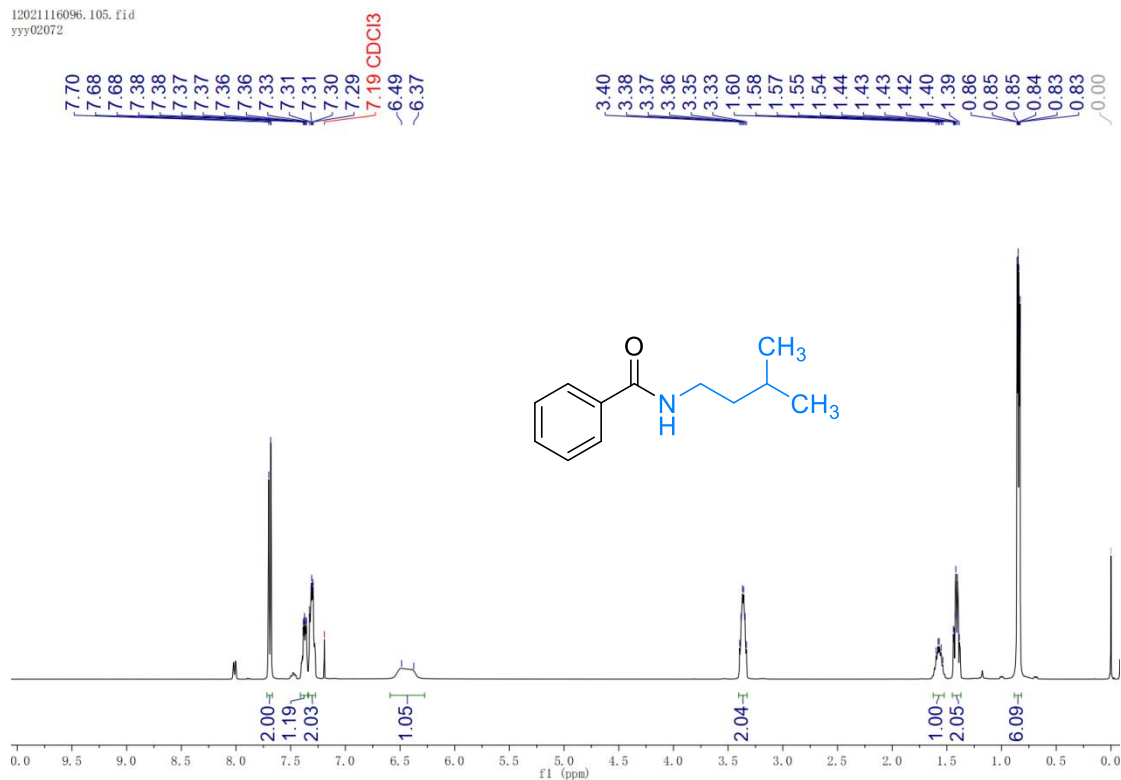

### <sup>1</sup>H-NMR (400 MHz, Chloroform-*d*) Spectra of compound 3r

12021116096.106.Fid  
yyy02072

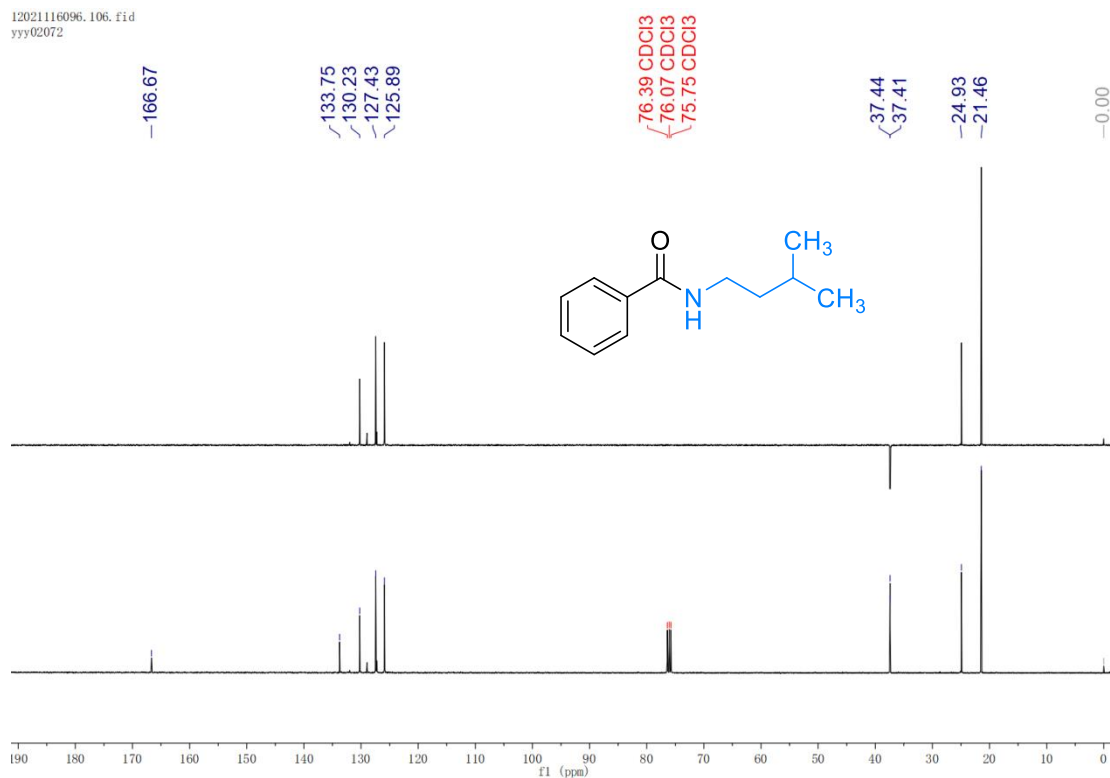

### <sup>13</sup>C-NMR (100 MHz, Chloroform-*d*) Spectra of compound 3r

12021116096.301.fid  
yyy02064

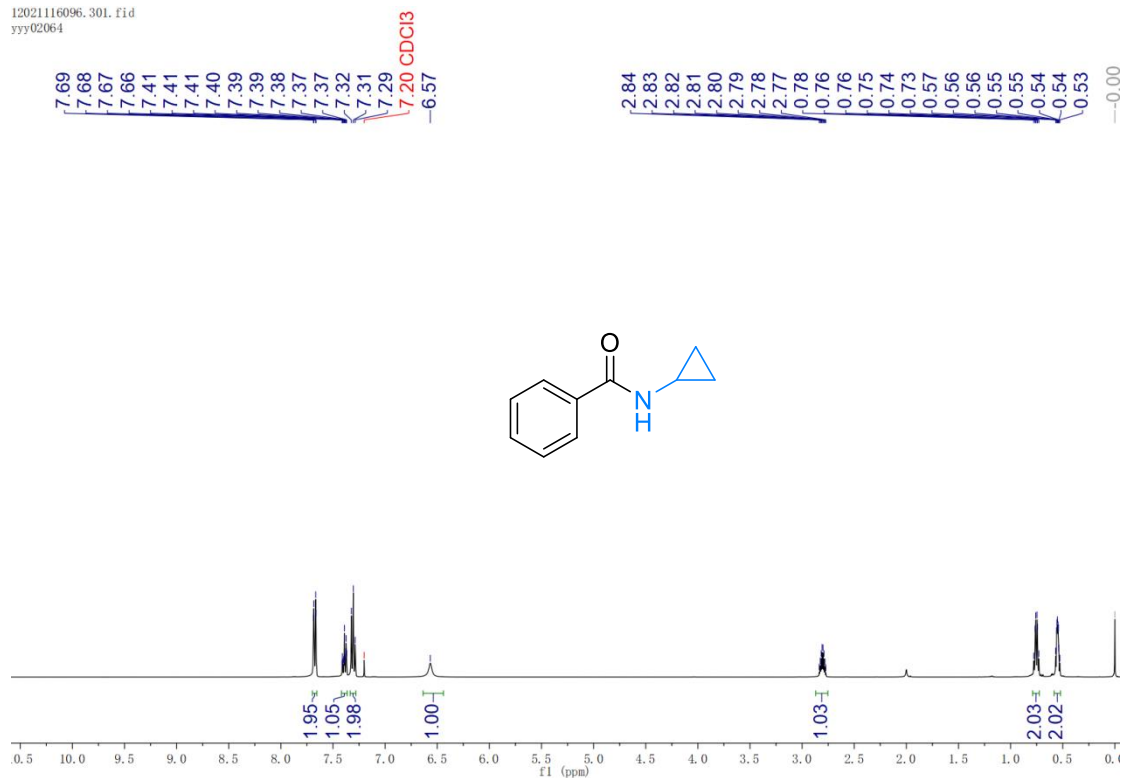

### <sup>1</sup>H-NMR (400 MHz, Chloroform-*d*) Spectra of compound 3s

12021116096.302.fid  
yyy02064

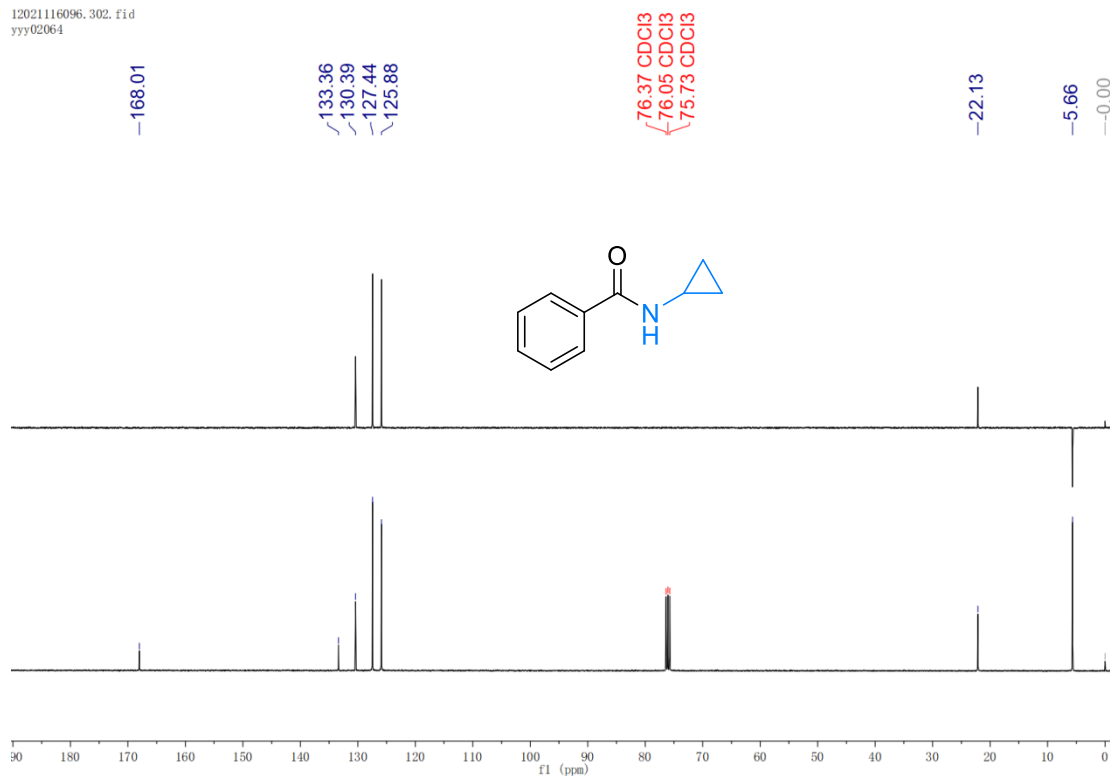

### <sup>13</sup>C-NMR (100 MHz, Chloroform-*d*) Spectra of compound 3s

12021116096.295.fid  
yyy02031

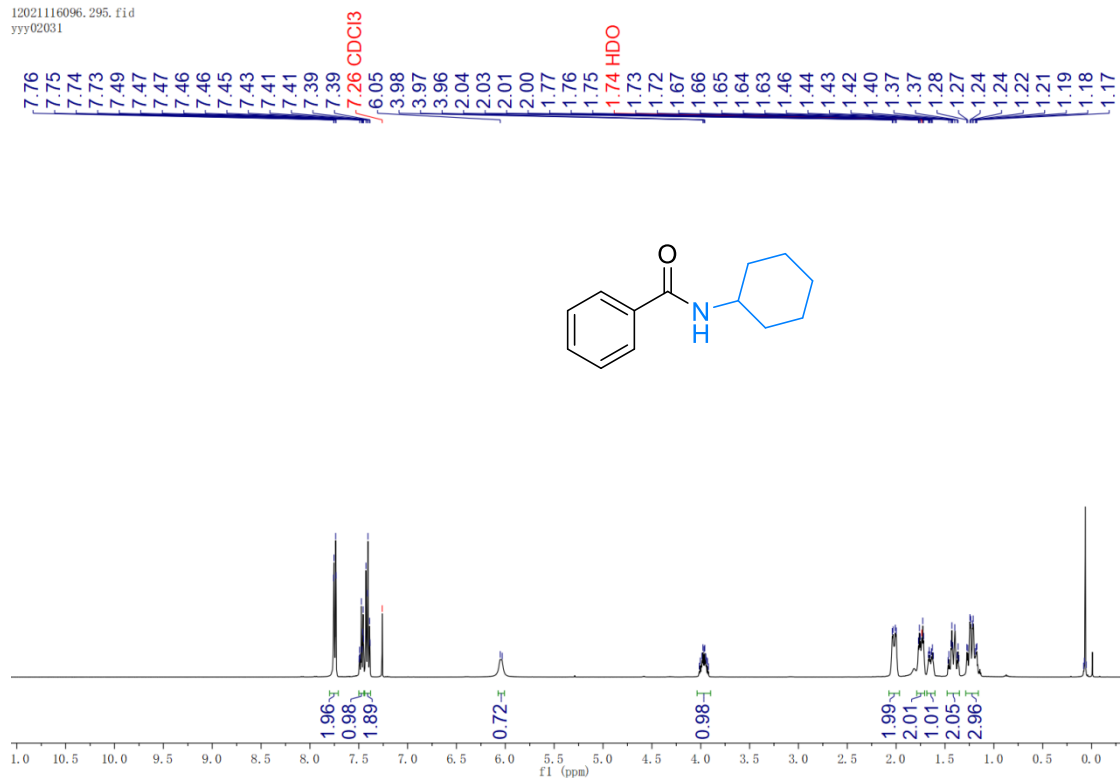

### <sup>1</sup>H-NMR (400 MHz, Chloroform-*d*) Spectra of compound 3t

12021116096.87.fid  
yyy02031

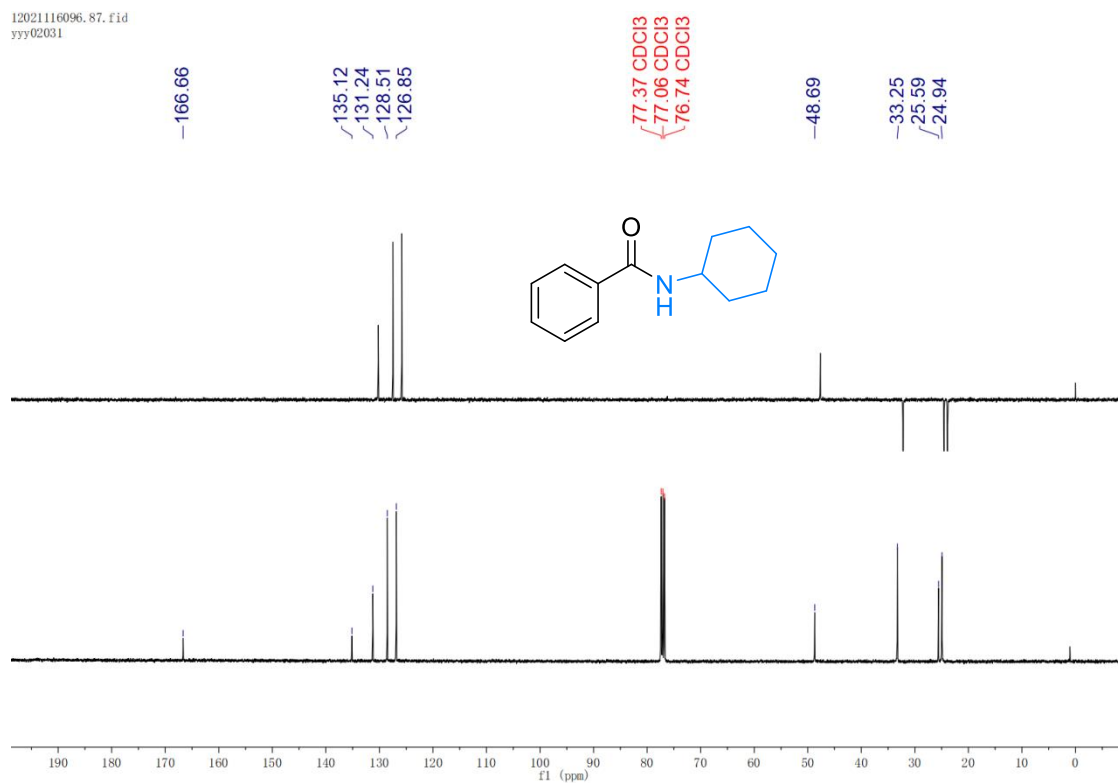

### <sup>13</sup>C-NMR (100 MHz, Chloroform-*d*) Spectra of compound 3t



12021116096\_93.fid  
yyy02059

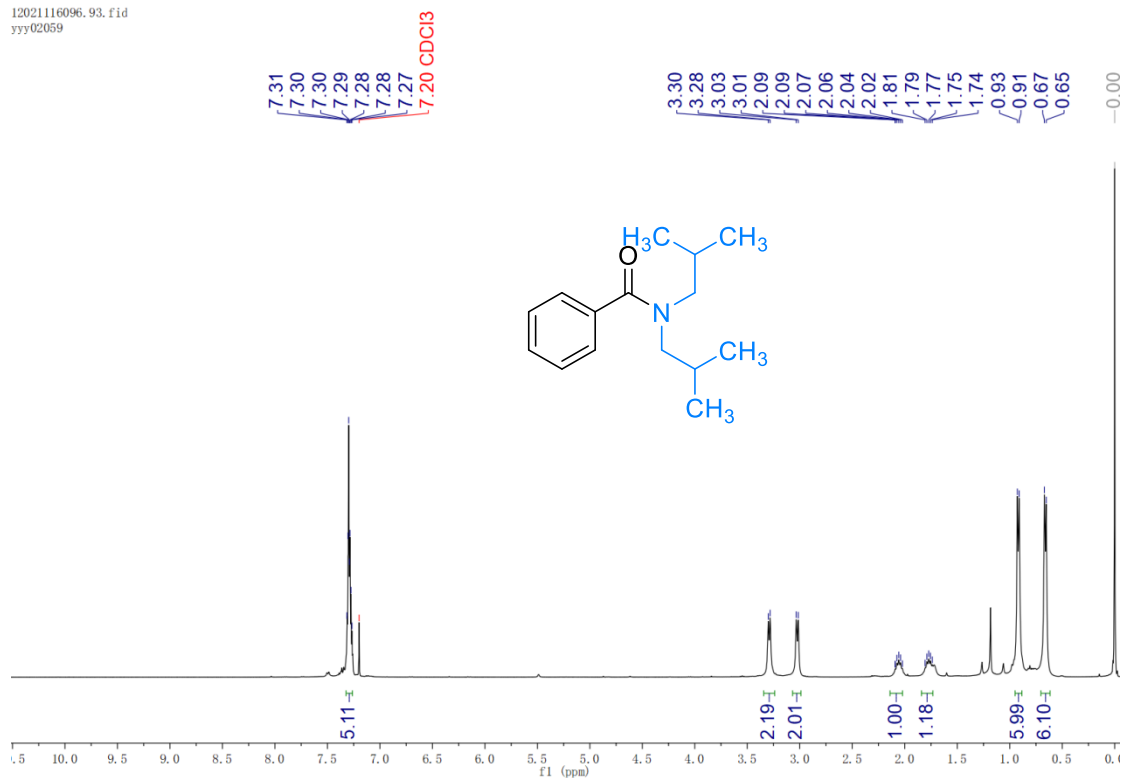

### <sup>1</sup>H-NMR (400 MHz, Chloroform-*d*) Spectra of compound 3u

12021116096\_94.fid  
yyy02059

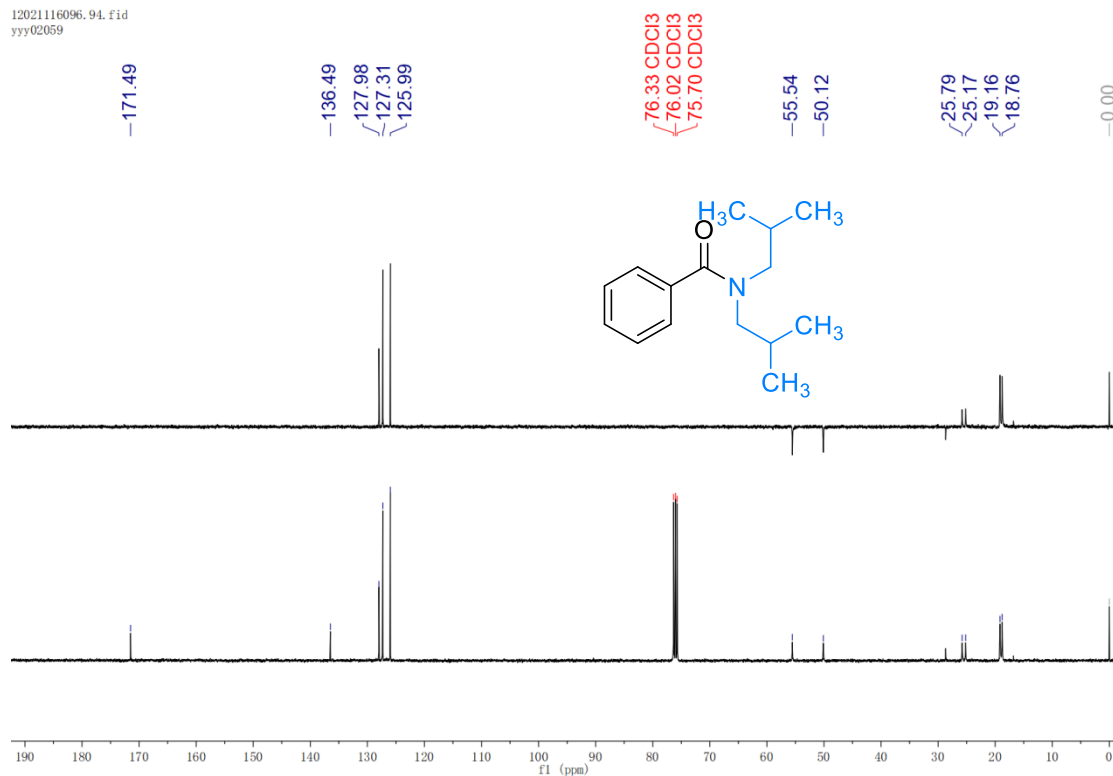

### <sup>13</sup>C-NMR (100 MHz, Chloroform-*d*) Spectra of compound 3u

12021116096.297.fid  
yyy02053

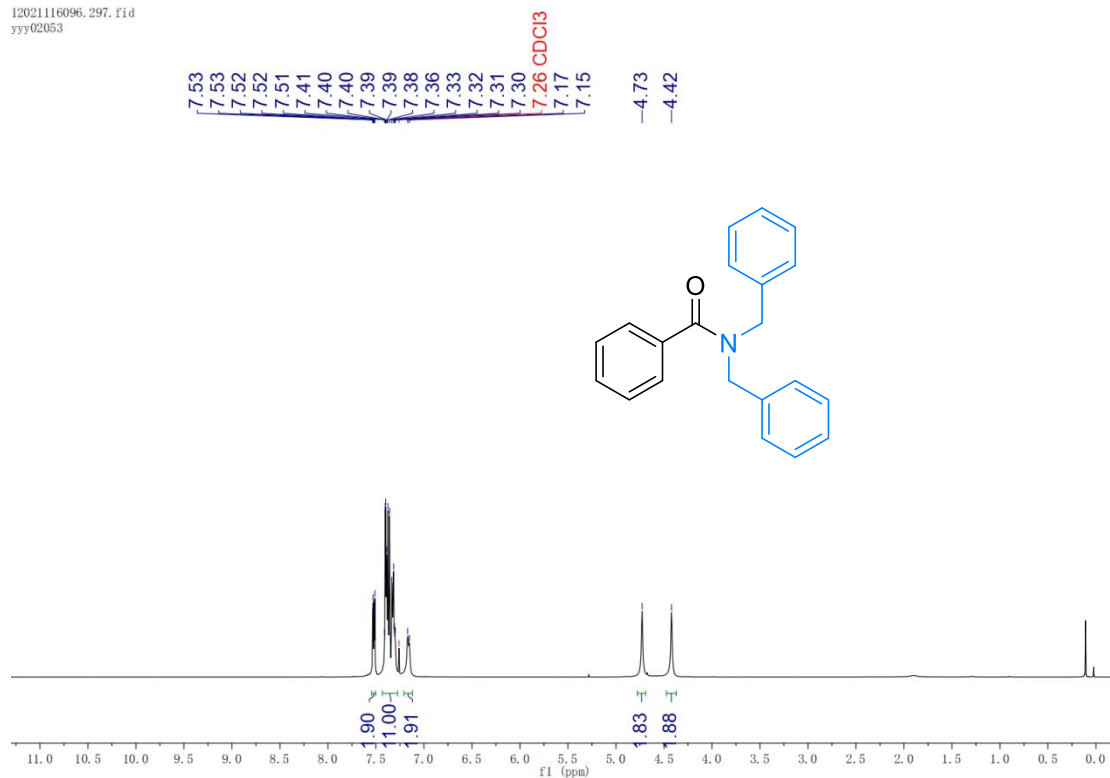

### <sup>1</sup>H-NMR (400 MHz, Chloroform-*d*) Spectra of compound 3v

12021116096.298.fid  
yyy02053

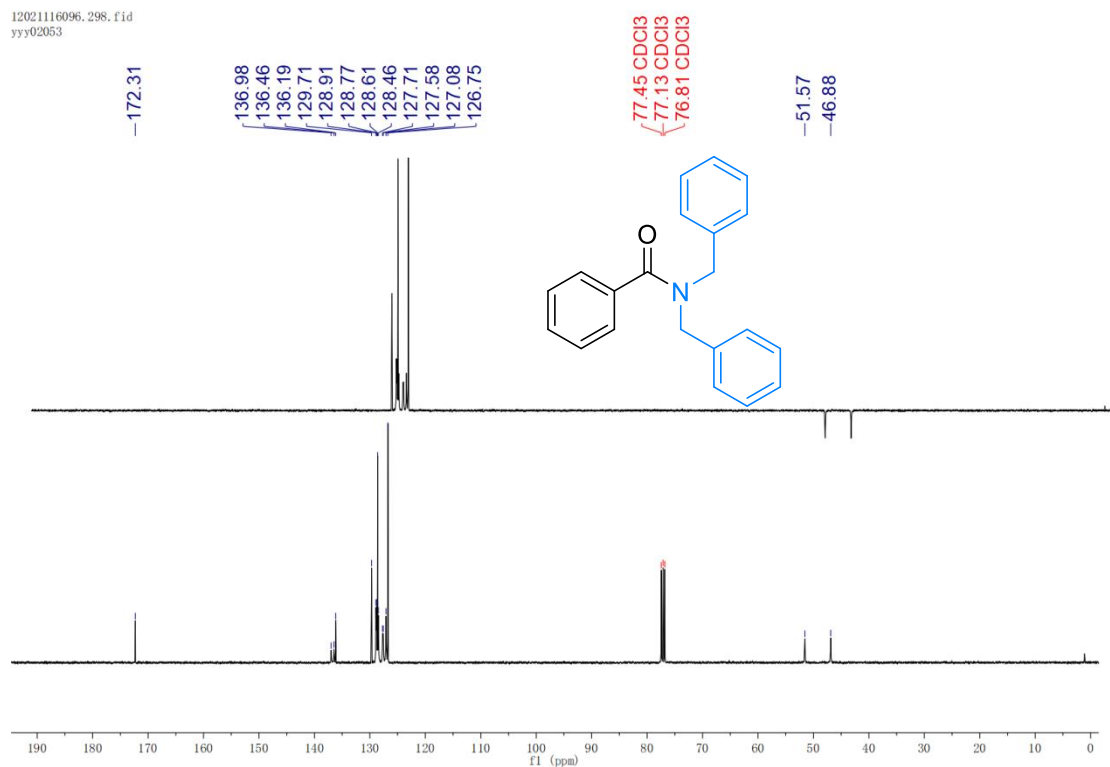

### <sup>13</sup>C-NMR (100 MHz, Chloroform-*d*) Spectra of compound 3v

12021116096.99.fid  
YY02060

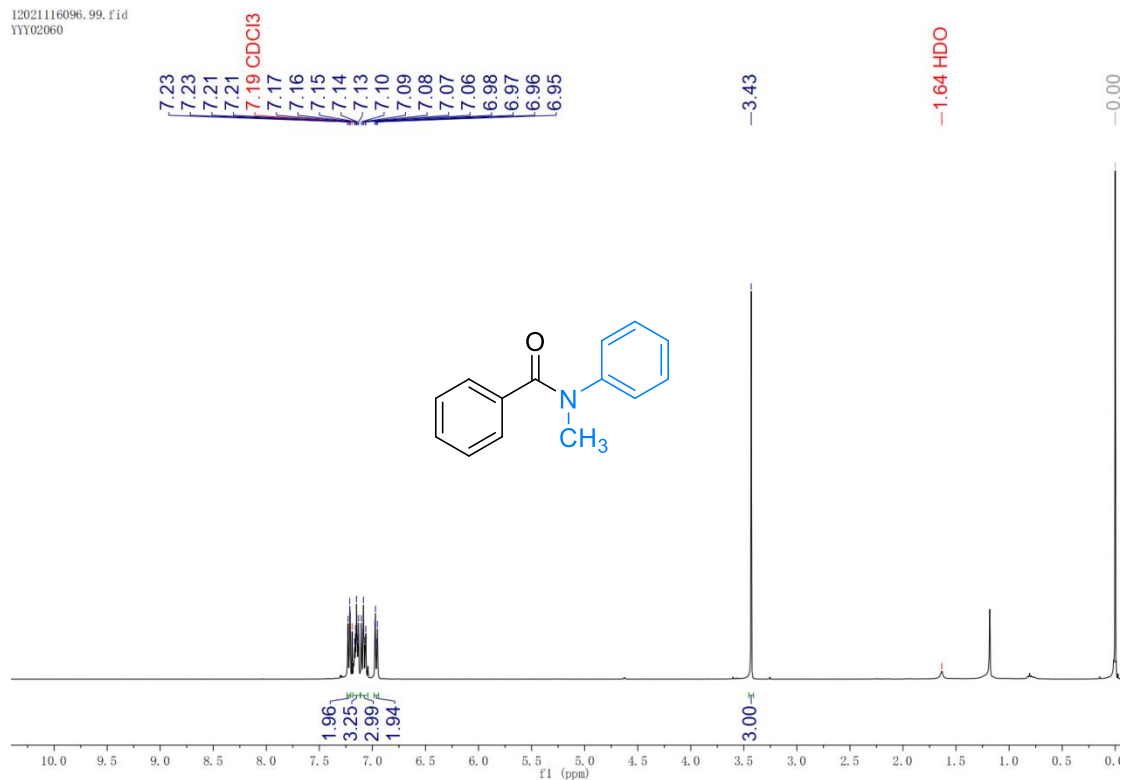

### <sup>1</sup>H-NMR (400 MHz, Chloroform-*d*) Spectra of compound 3w

12021116096.100.fid  
YY02060

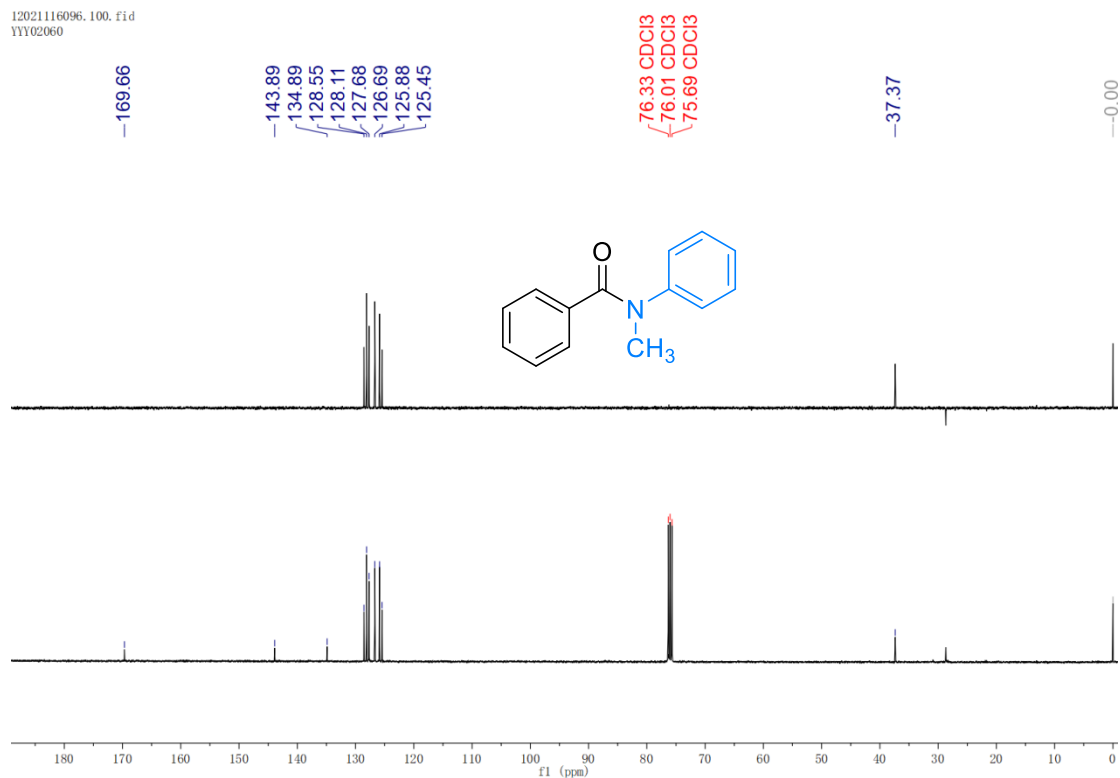

### <sup>13</sup>C-NMR (100 MHz, Chloroform-*d*) Spectra of compound 3w

12021116096.96.fid  
yyy02058

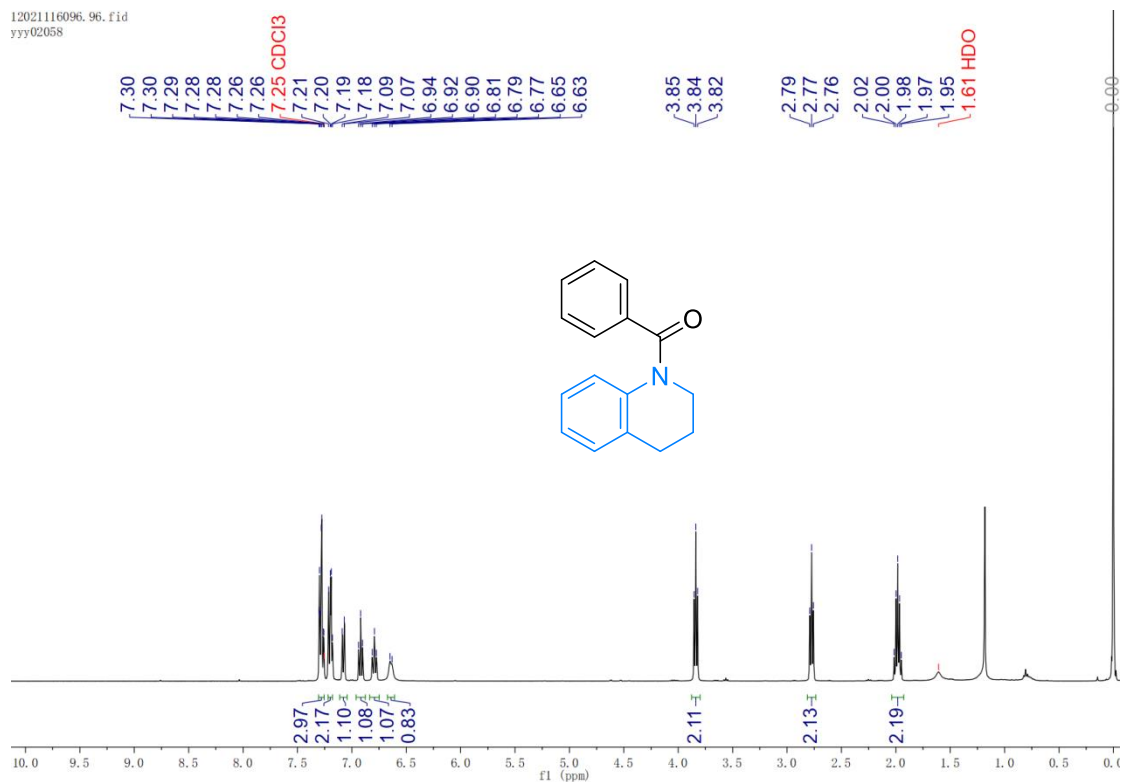

### <sup>1</sup>H-NMR (400 MHz, Chloroform-*d*) Spectra of compound 3x

12021116096.97.fid  
yyy02058

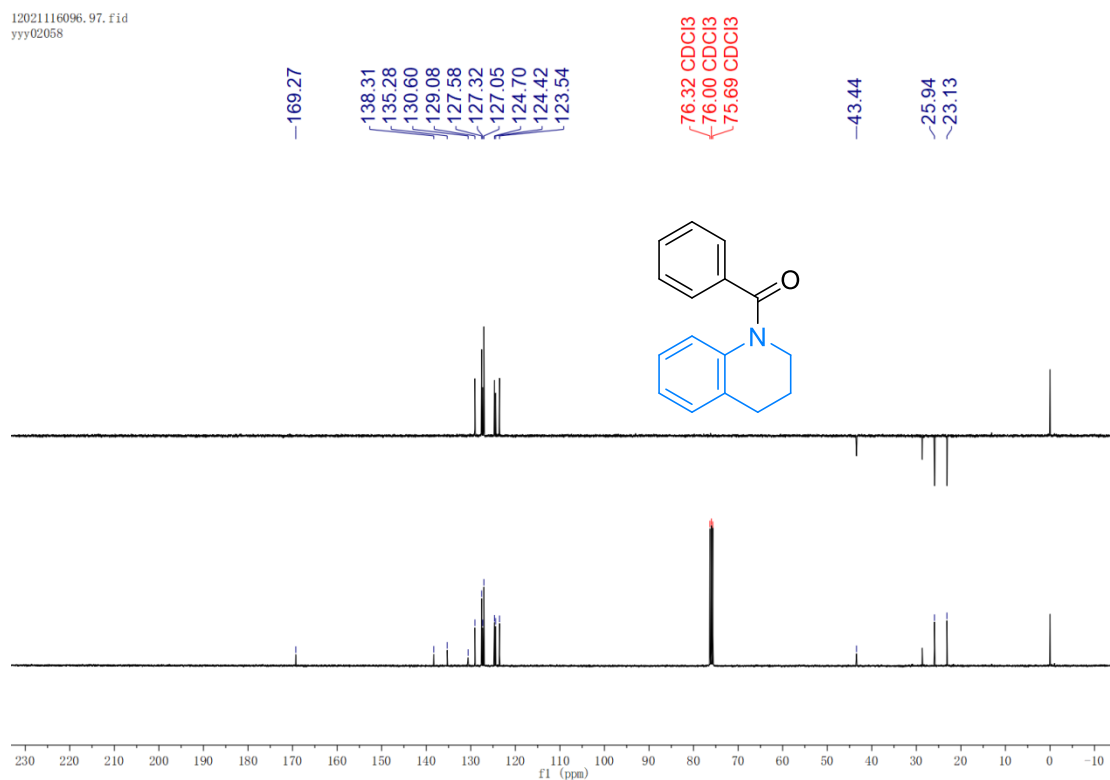

### <sup>13</sup>C-NMR (100 MHz, Chloroform-*d*) Spectra of compound 3x

12021116096.102.fid  
yyy02071

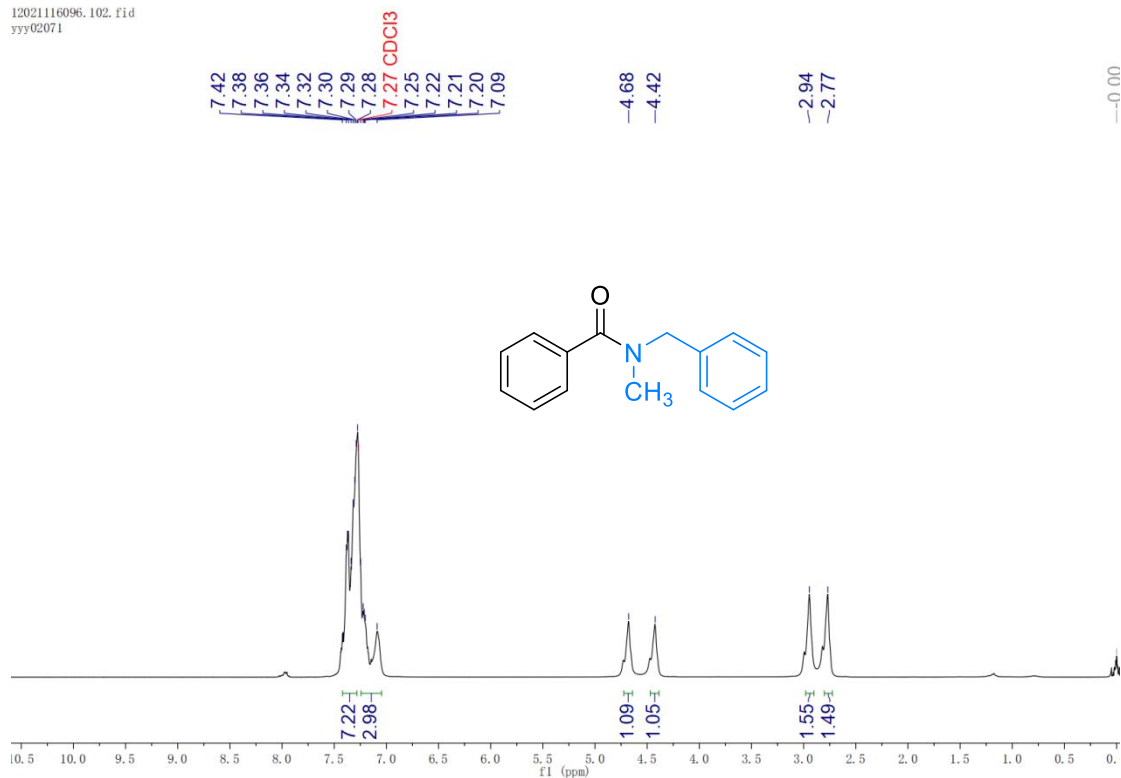

### <sup>1</sup>H-NMR (400 MHz, Chloroform-*d*) Spectra of compound 3y

12021116096.103.fid  
yyy02071

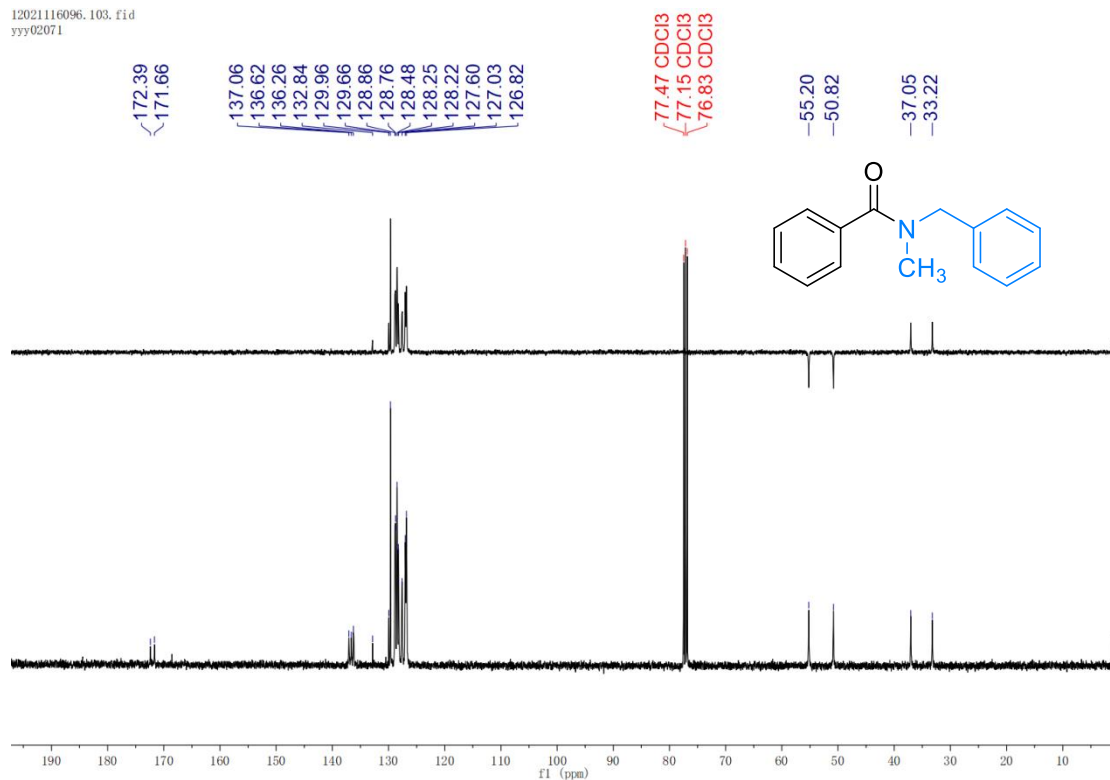

### <sup>13</sup>C-NMR (100 MHz, Chloroform-*d*) Spectra of compound 3y

12021116096.125.fid  
yyy01004

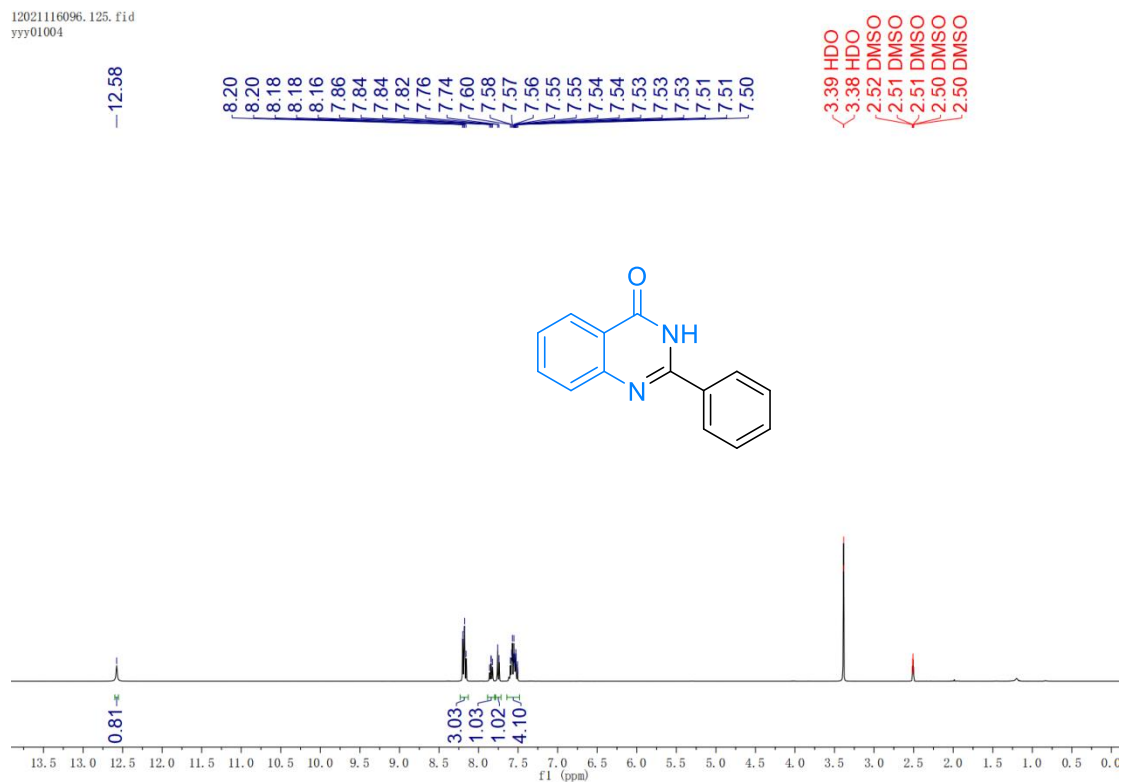

### <sup>1</sup>H-NMR (400 MHz, DMSO-*d*<sub>6</sub>) Spectra of compound 5a

12021116096.126.fid  
yyy01004

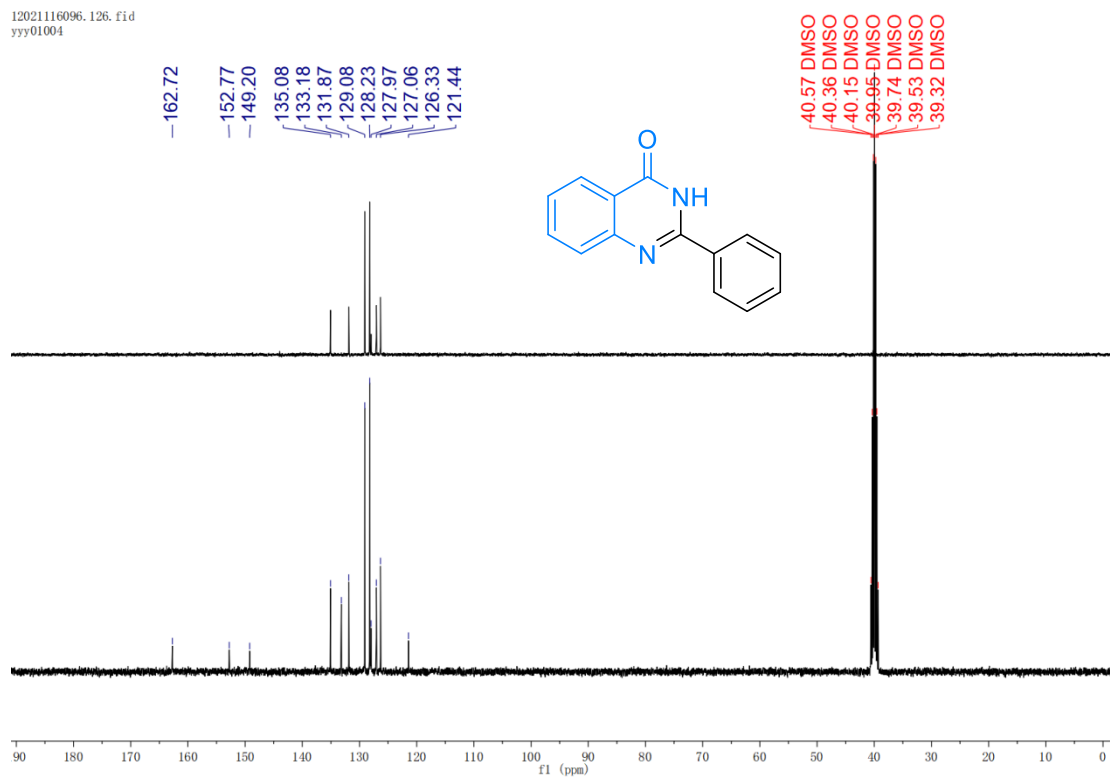

### <sup>13</sup>C-NMR (100 MHz, DMSO-*d*<sub>6</sub>) Spectra of compound 5a

12021116096.13.fid  
yyy01034-1

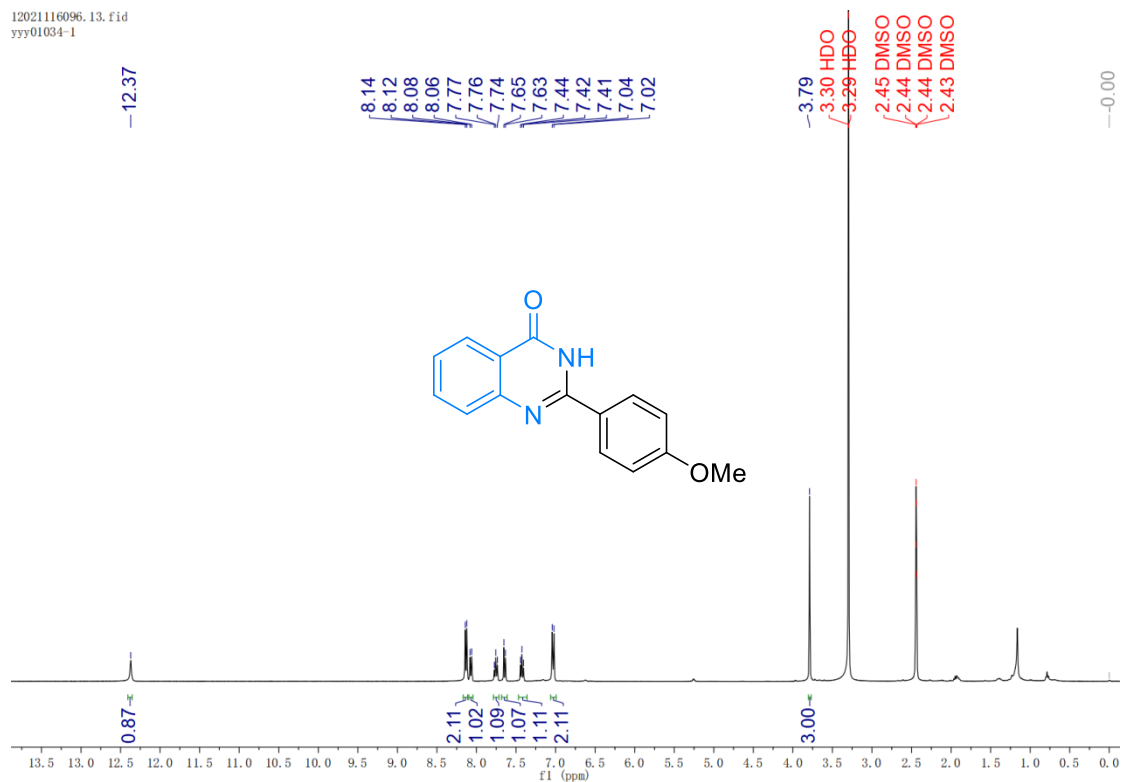

### <sup>1</sup>H-NMR (400 MHz, DMSO-*d*<sub>6</sub>) Spectra of compound 5b

12021116096.15.fid  
yyy01034-1

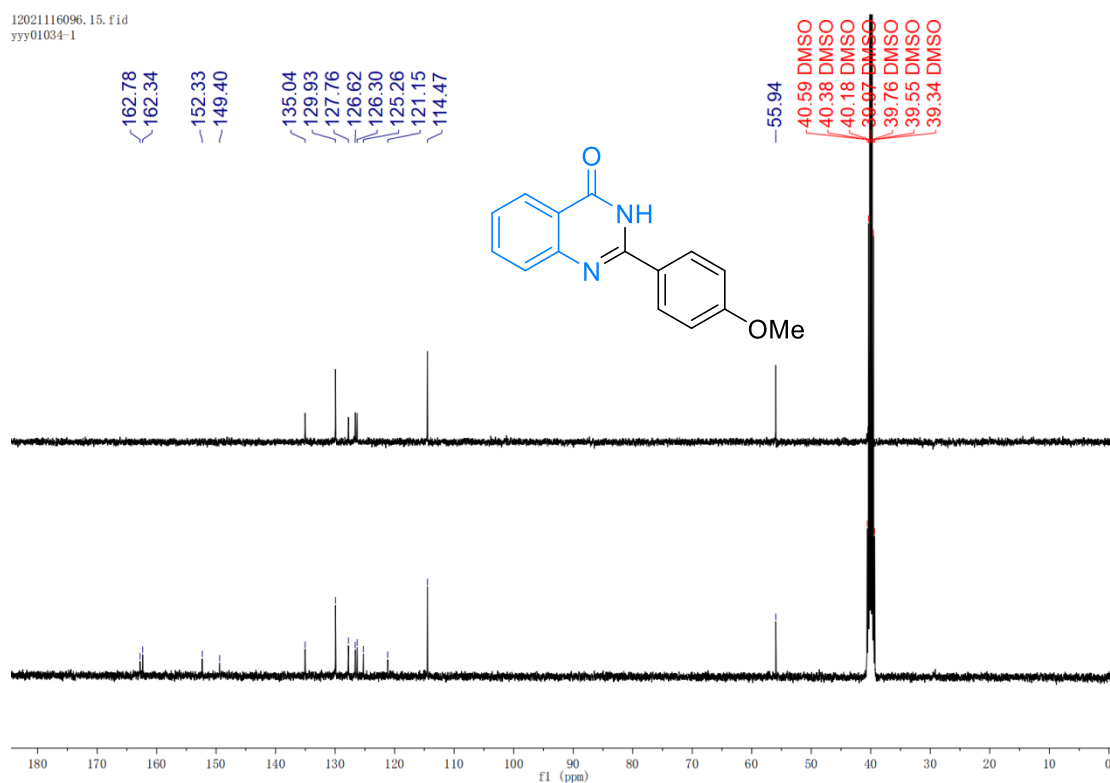

### <sup>13</sup>C-NMR (100 MHz, DMSO-*d*<sub>6</sub>) Spectra of compound 5b

12021116096.1.fid  
yyy01080

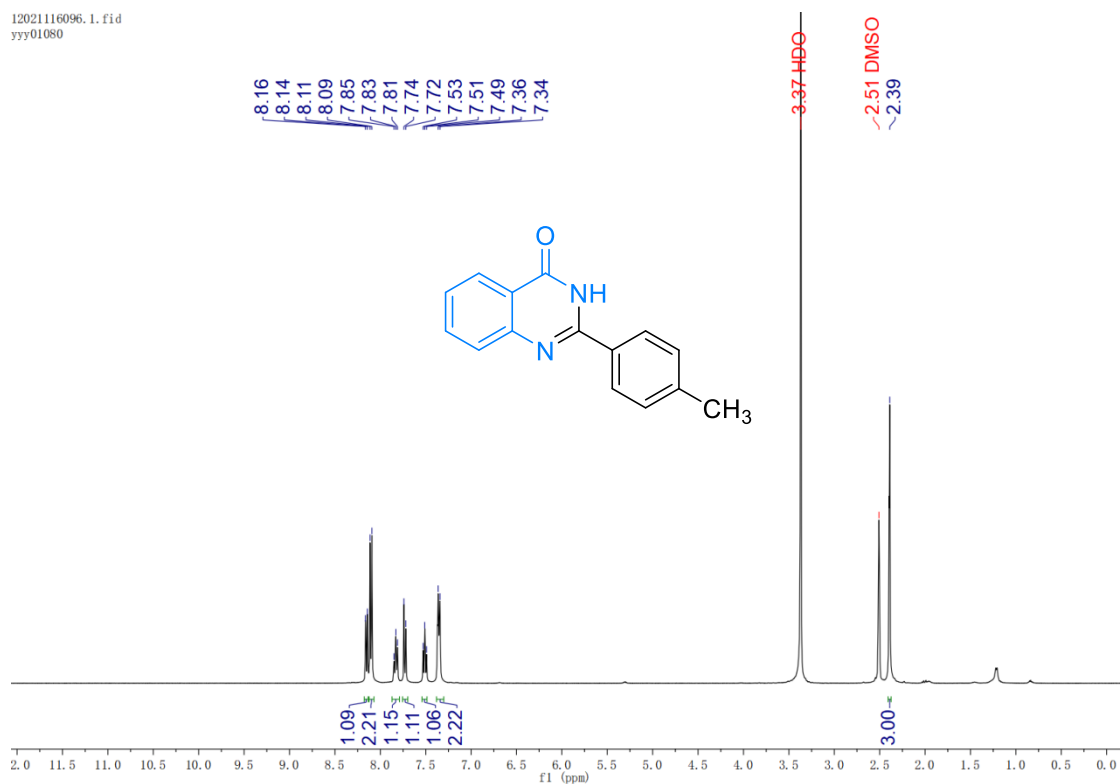

### <sup>1</sup>H-NMR (400 MHz, DMSO-*d*<sub>6</sub>) Spectra of compound 5c

12021116096.71.fid  
yyy01080

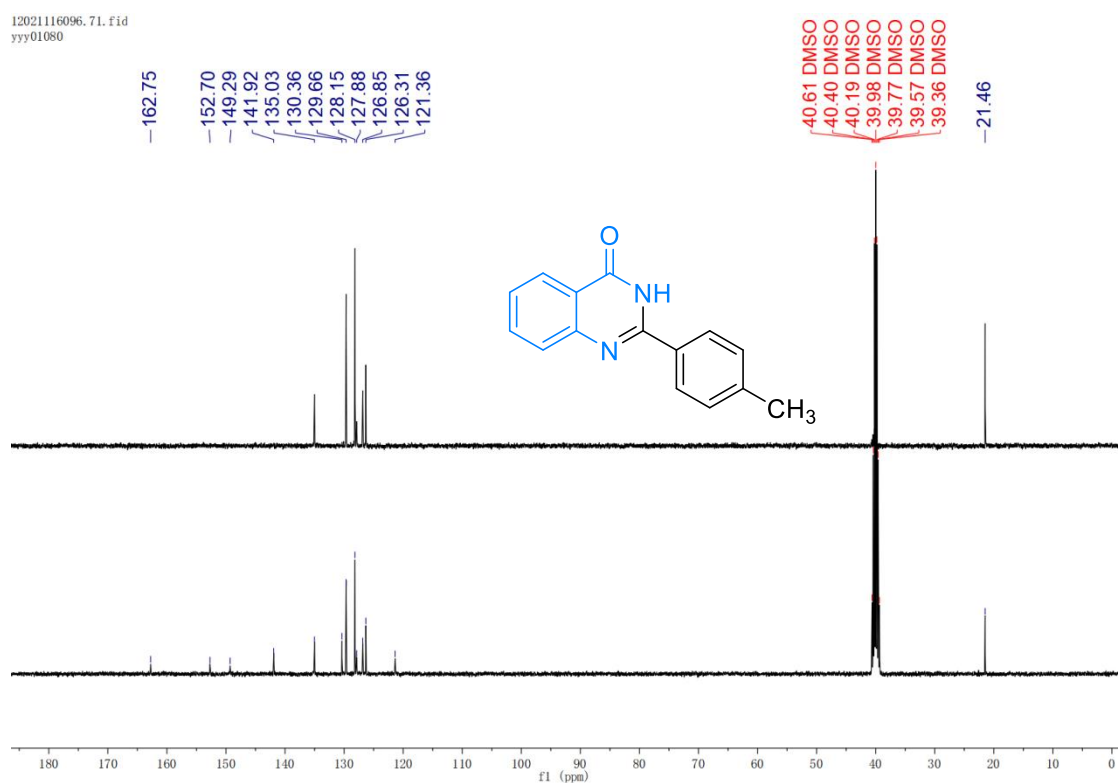

### <sup>13</sup>C-NMR (100 MHz, DMSO-*d*<sub>6</sub>) Spectra of compound 5c



12021116096.35.fid  
yyy01056

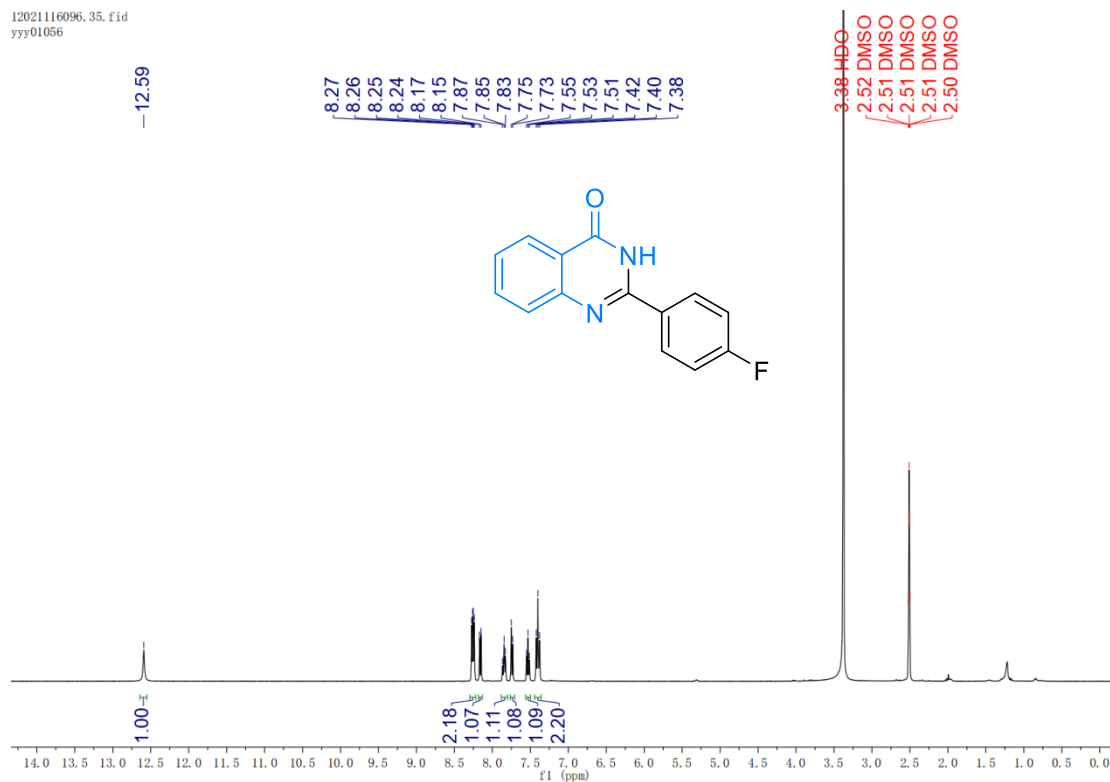

### <sup>1</sup>H-NMR (400 MHz, DMSO-*d*<sub>6</sub>) Spectra of compound 5d

12021116096.36.fid  
yyy01056

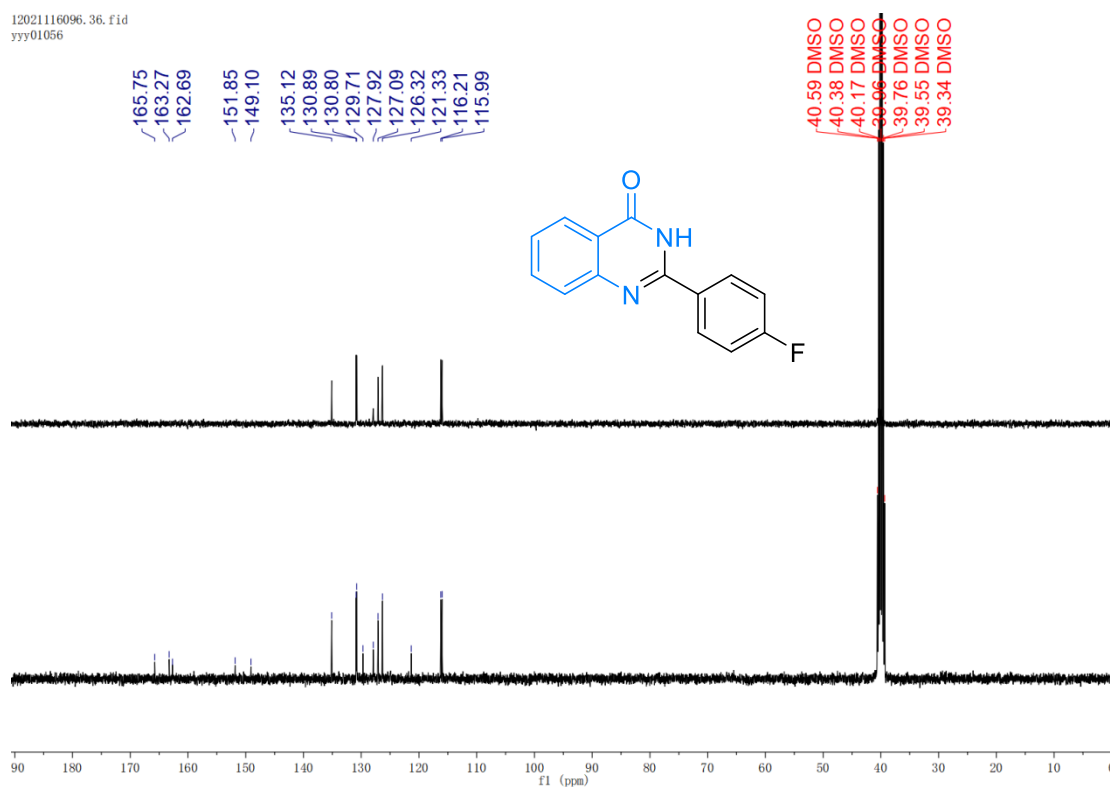

### <sup>13</sup>C-NMR (100 MHz, DMSO-*d*<sub>6</sub>) Spectra of compound 5d

12021116096.101.fid  
yyy01056

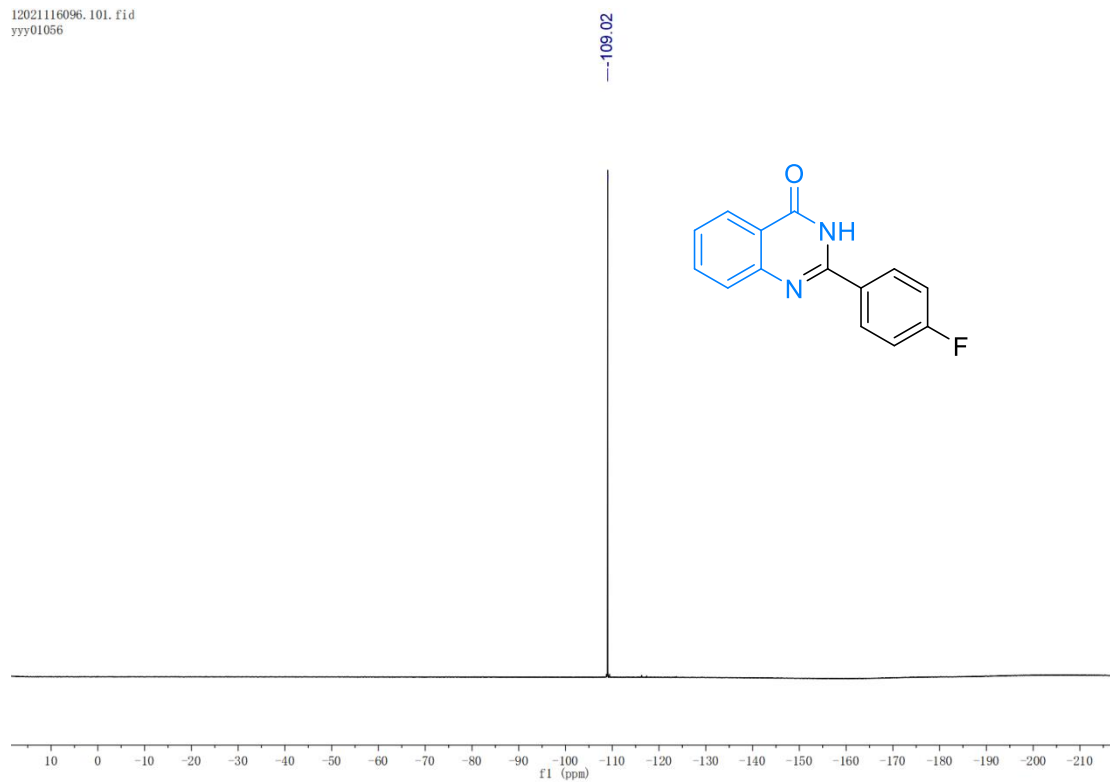

**$^{19}\text{F}$  NMR (376 MHz,  $\text{DMSO-}d_6$ ) Spectrum of compound 5d**

12021116096.1.fid  
yyy01039-2

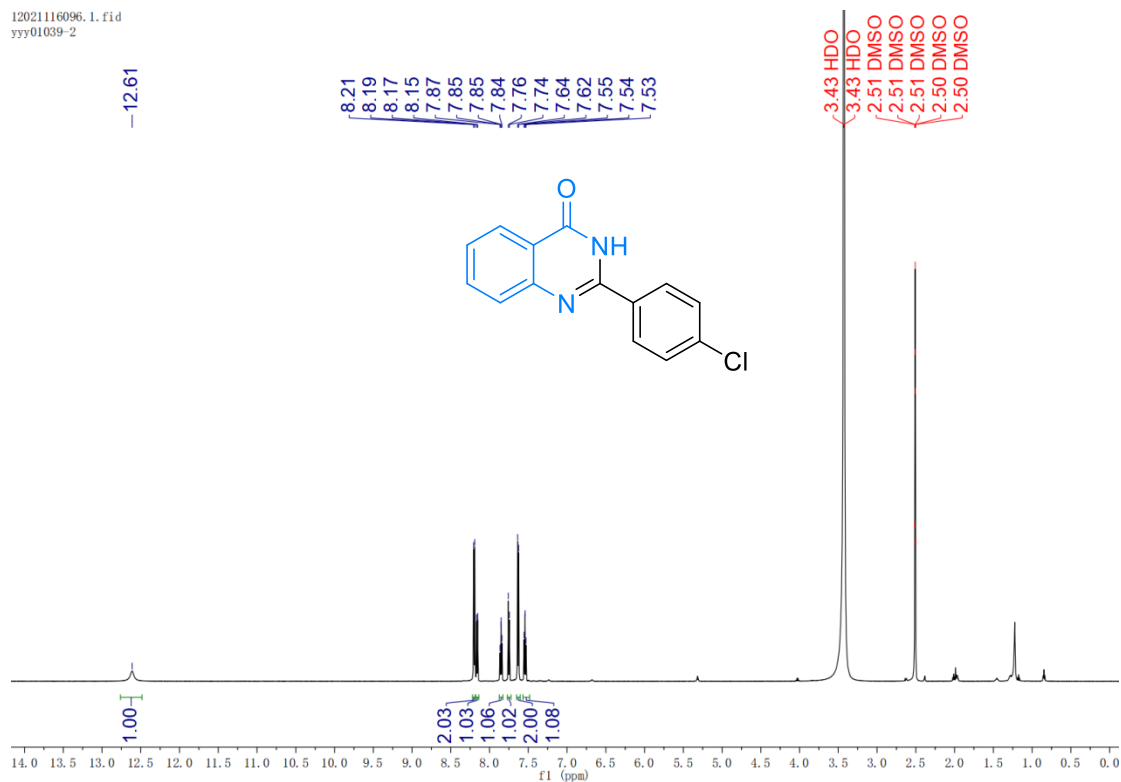

### <sup>1</sup>H-NMR (600 MHz, DMSO-*d*<sub>6</sub>) Spectra of compound 5e

12021116096.3.fid  
yyy01039-2

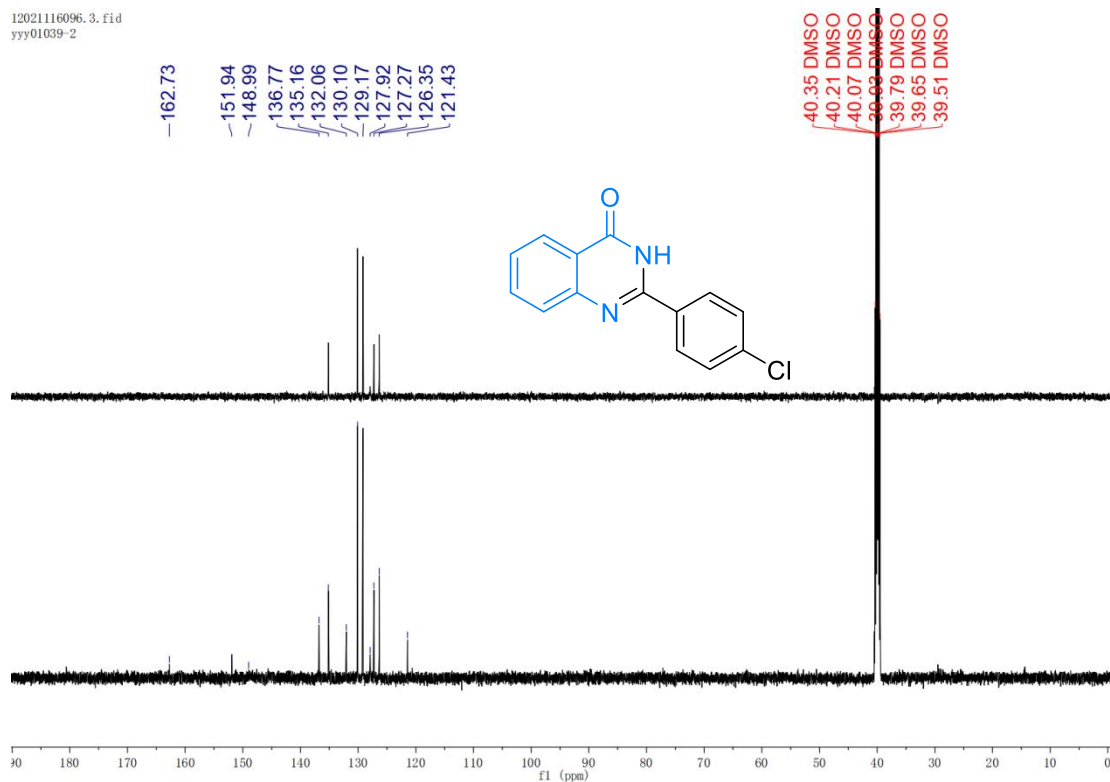

### <sup>13</sup>C-NMR (150 MHz, DMSO-*d*<sub>6</sub>) Spectra of compound 5e

12021116096.18.fid  
yyy01039-1

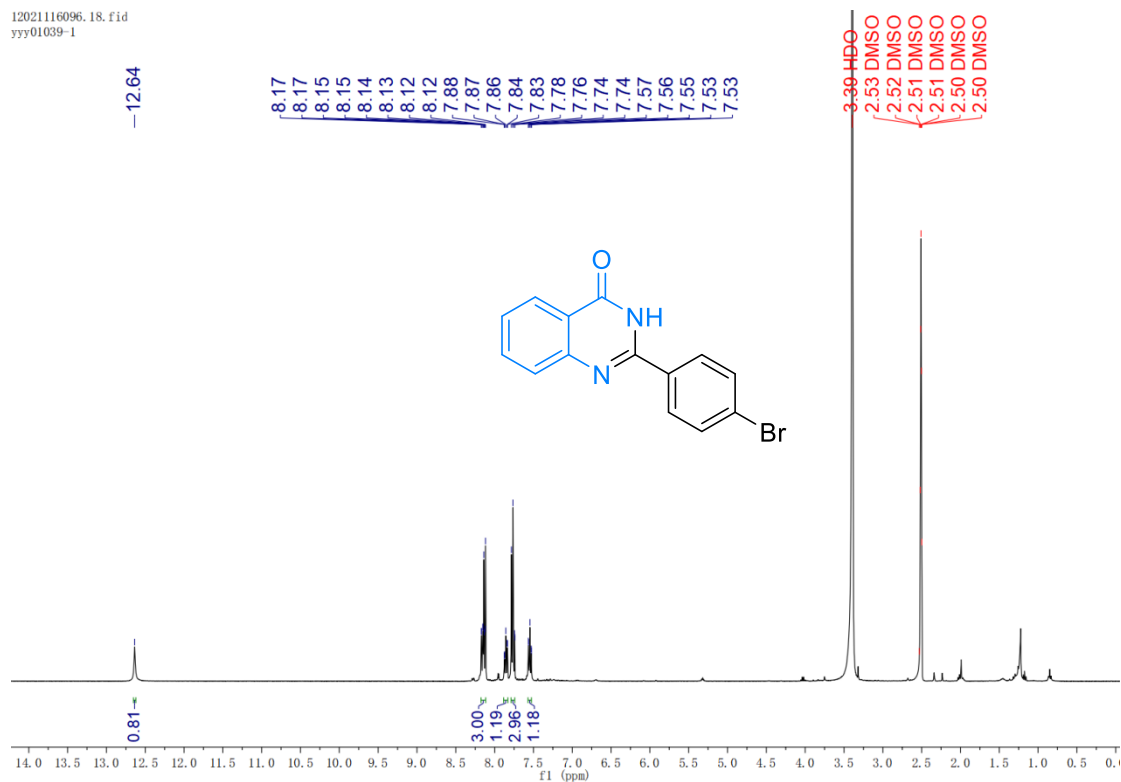

### <sup>1</sup>H-NMR (400 MHz, DMSO-*d*<sub>6</sub>) Spectra of compound 5f

12021116096.20.fid  
yyy01039-1

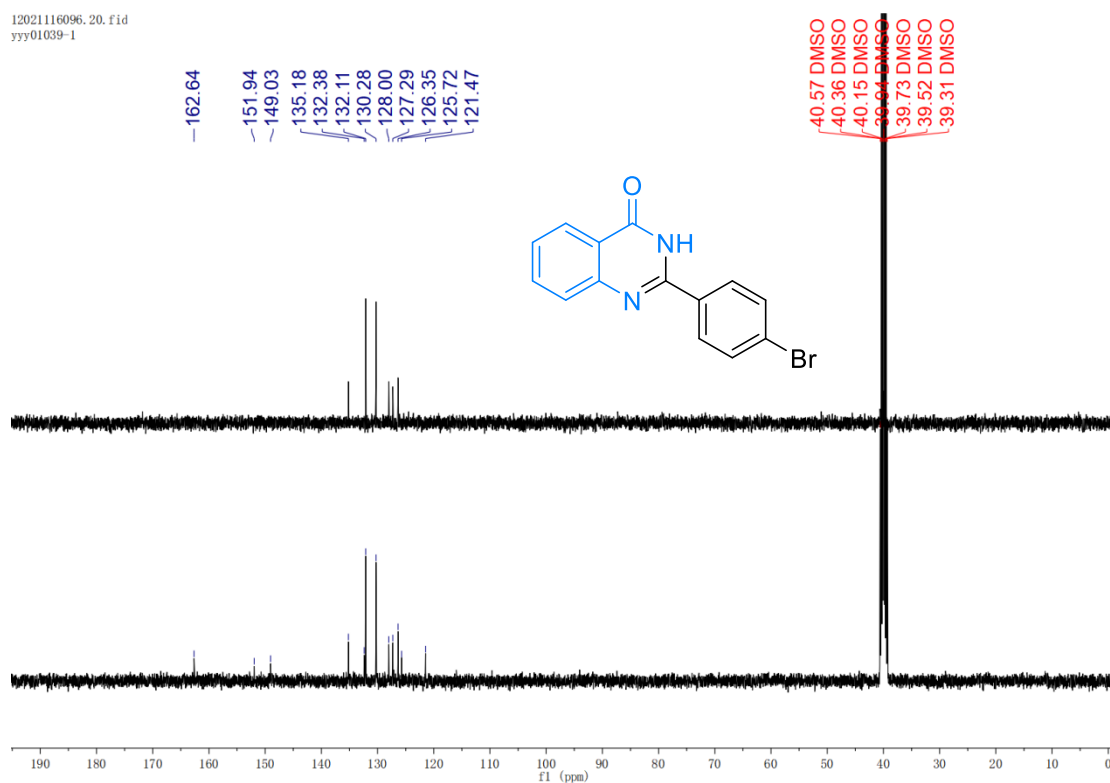

### <sup>13</sup>C-NMR (100 MHz, DMSO-*d*<sub>6</sub>) Spectra of compound 5f

12021116096\_48.fid  
yyy01066-1

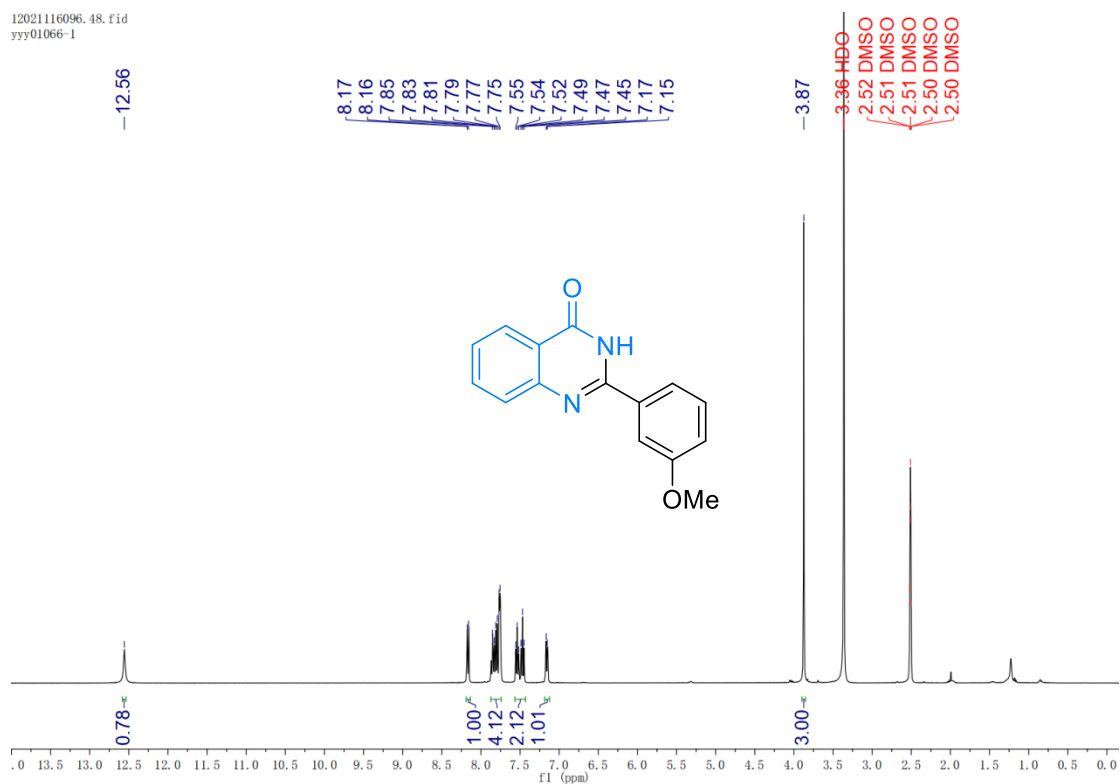

### <sup>1</sup>H-NMR (400 MHz, DMSO-*d*<sub>6</sub>) Spectra of compound 5g

12021116096\_49.fid  
yyy01066-1

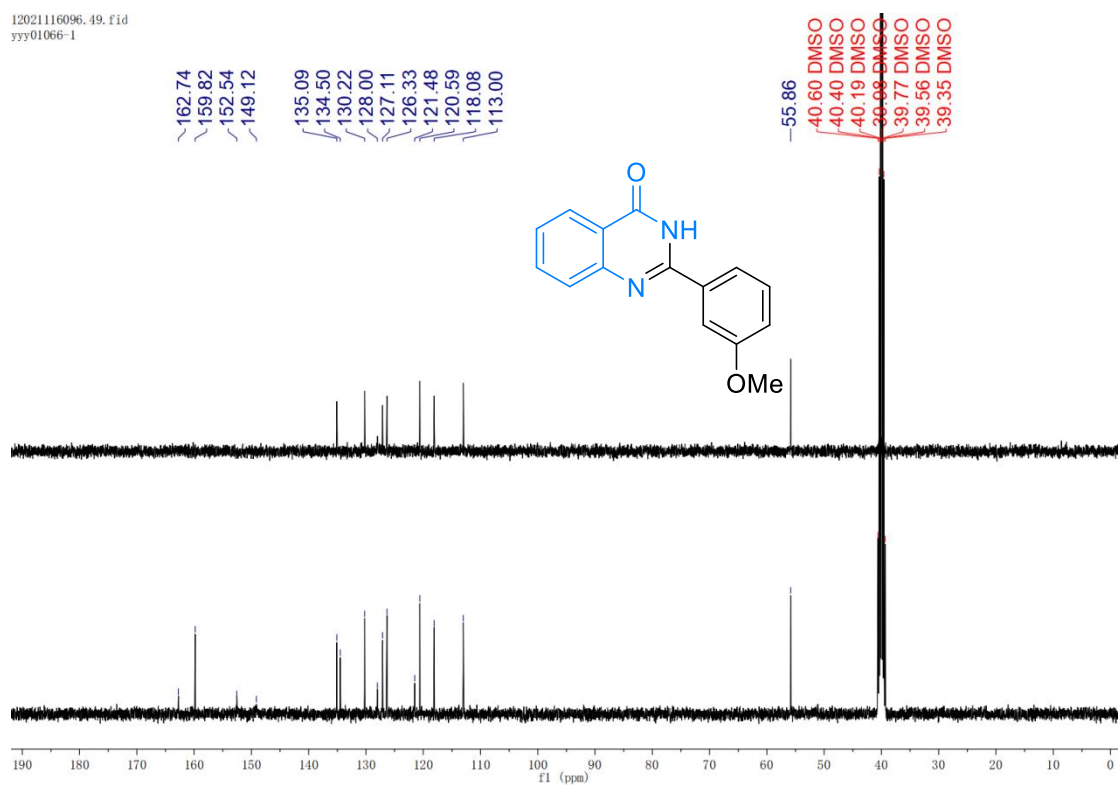

### <sup>13</sup>C-NMR (100 MHz, DMSO-*d*<sub>6</sub>) Spectra of compound 5g

12021116096.32.fid  
yyy01057

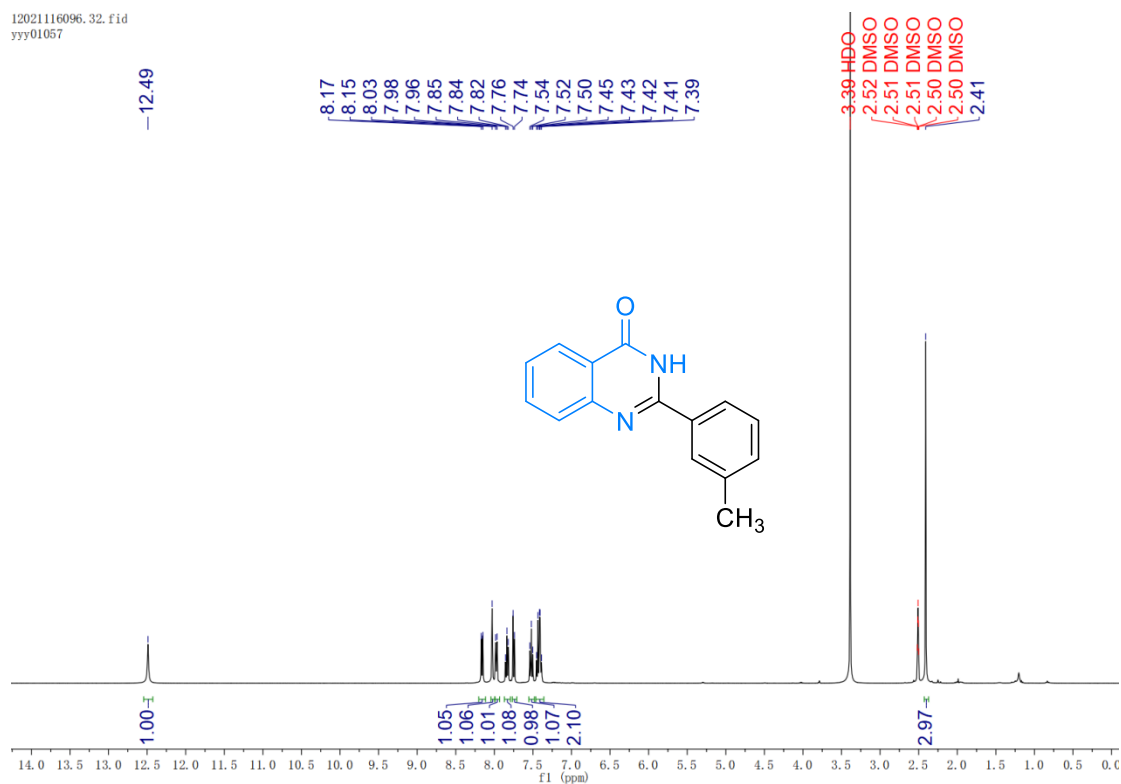

### <sup>1</sup>H-NMR (400 MHz, DMSO-*d*<sub>6</sub>) Spectra of compound 5h

12021116096.33.fid  
yyy01057

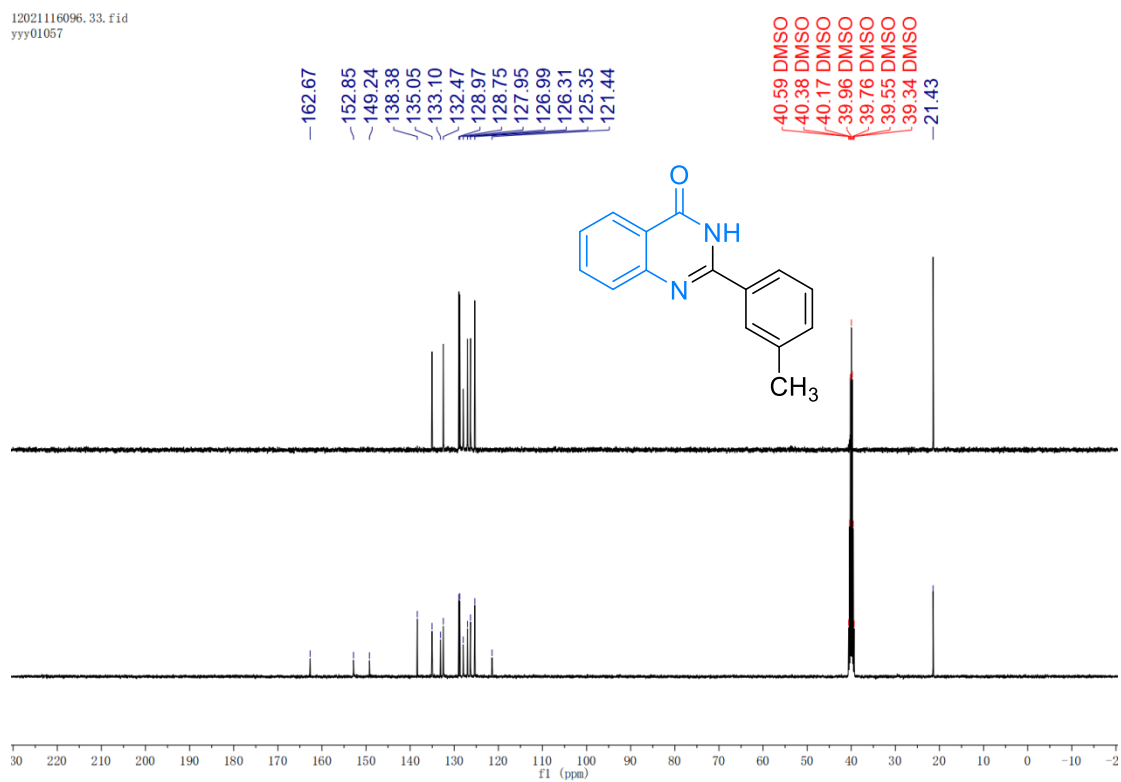

### <sup>13</sup>C-NMR (100 MHz, DMSO-*d*<sub>6</sub>) Spectra of compound 5h

12021116096.115.fid  
yyy01065

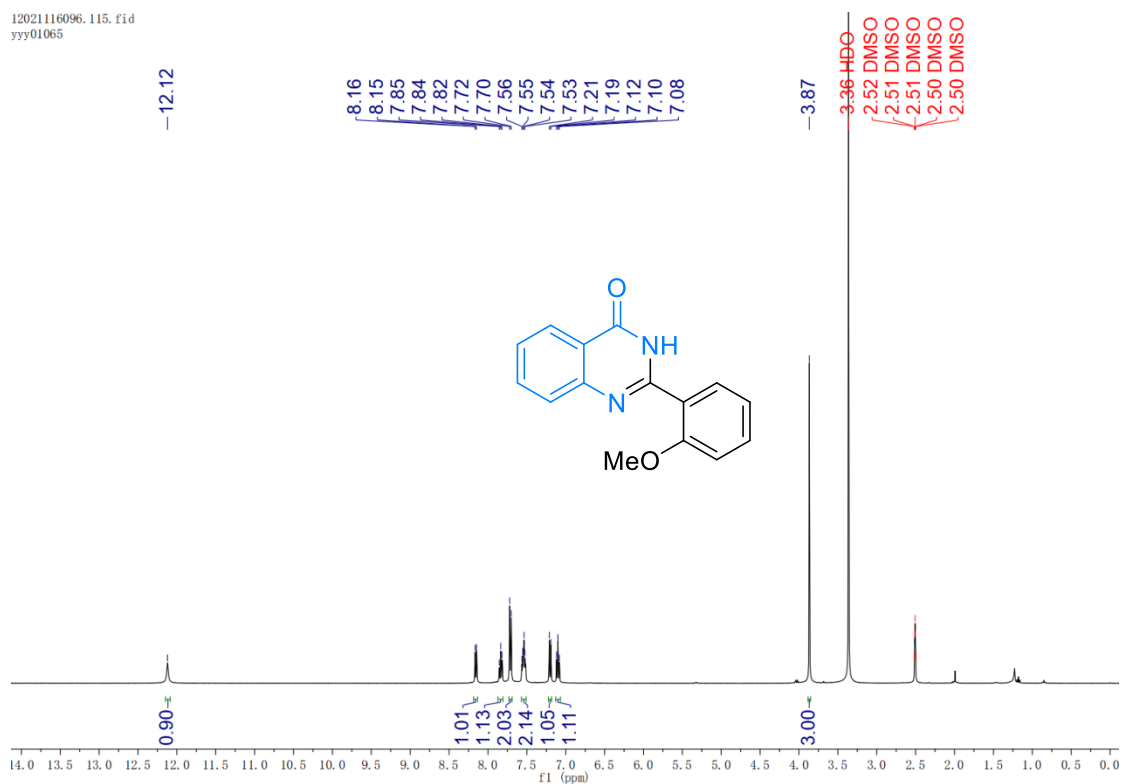

### <sup>1</sup>H-NMR (400 MHz, DMSO-*d*<sub>6</sub>) Spectra of compound 5i

12021116096.116.fid  
yyy01065

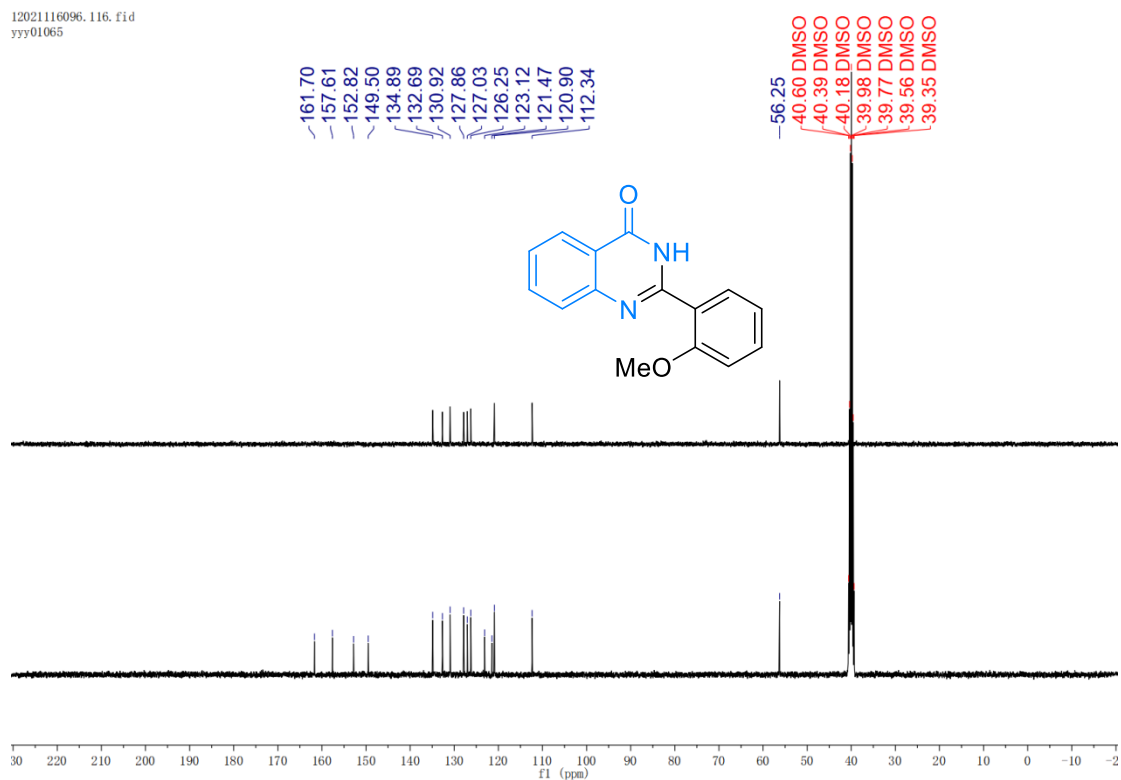

### <sup>13</sup>C-NMR (100 MHz, DMSO-*d*<sub>6</sub>) Spectra of compound 5i

12021116096.10.fid  
yyy01033-1

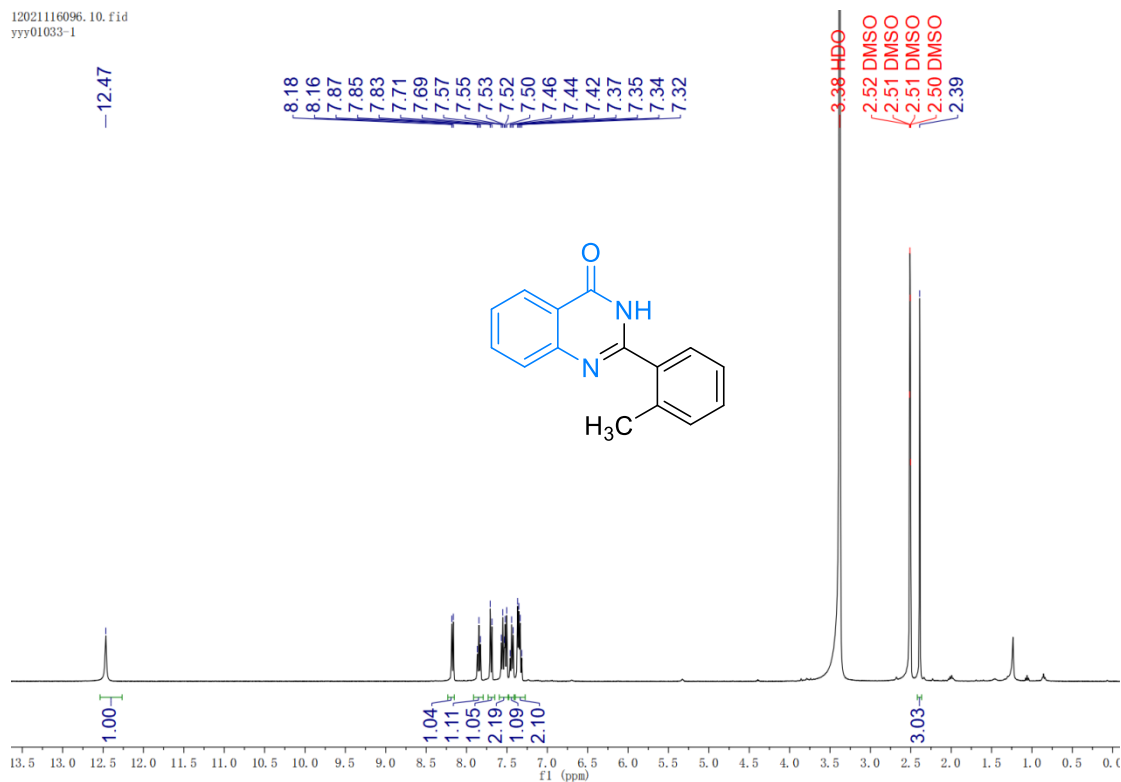

### <sup>1</sup>H-NMR (400 MHz, DMSO-*d*<sub>6</sub>) Spectra of compound 5j

12021116096.12.fid  
yyy01033-1

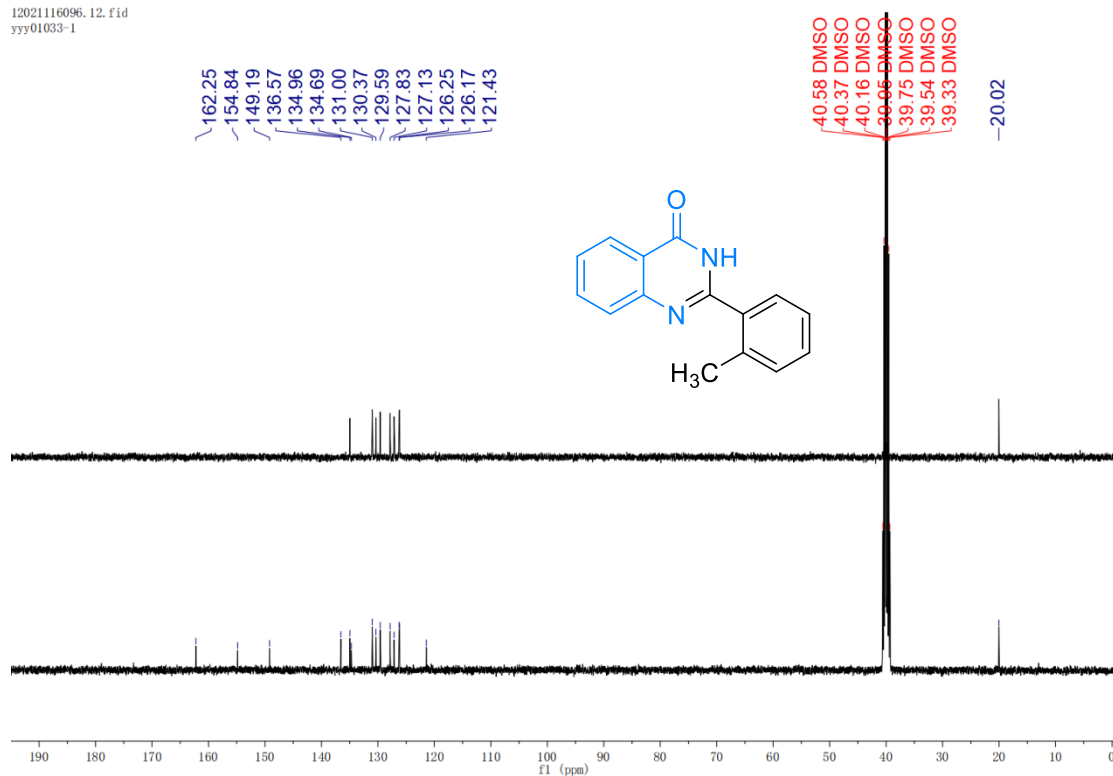

### <sup>13</sup>C-NMR (100 MHz, DMSO-*d*<sub>6</sub>) Spectra of compound 5j



12021116096.1.fid  
yyy01077

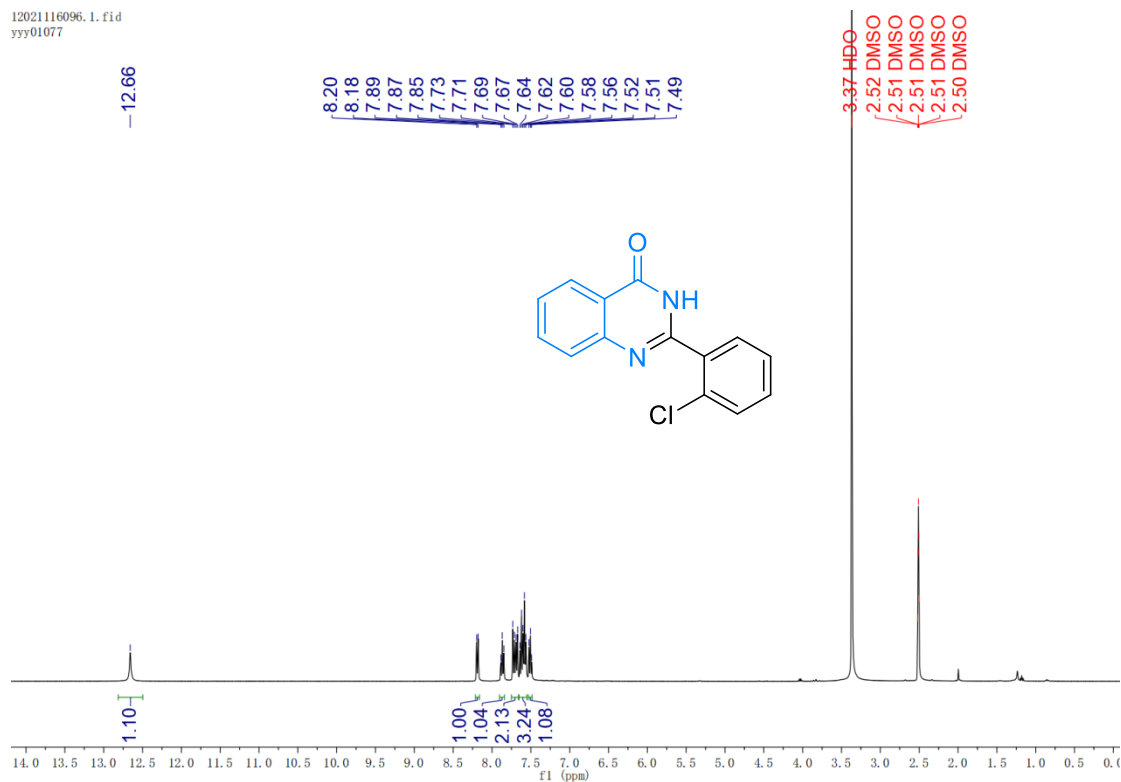

### <sup>1</sup>H-NMR (400 MHz, DMSO-*d*<sub>6</sub>) Spectra of compound 5k

12021116096.8.fid  
yyy01077

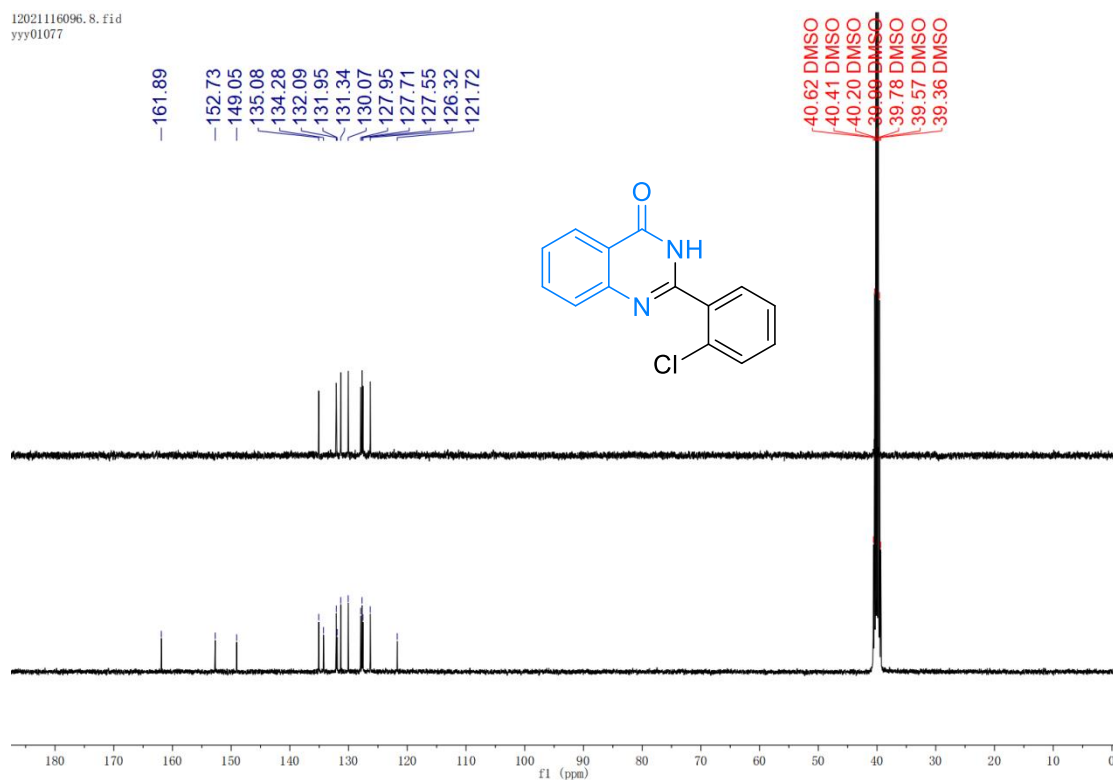

### <sup>13</sup>C-NMR (100 MHz, DMSO-*d*<sub>6</sub>) Spectra of compound 5k

12021116096.112.fid  
yyy01053

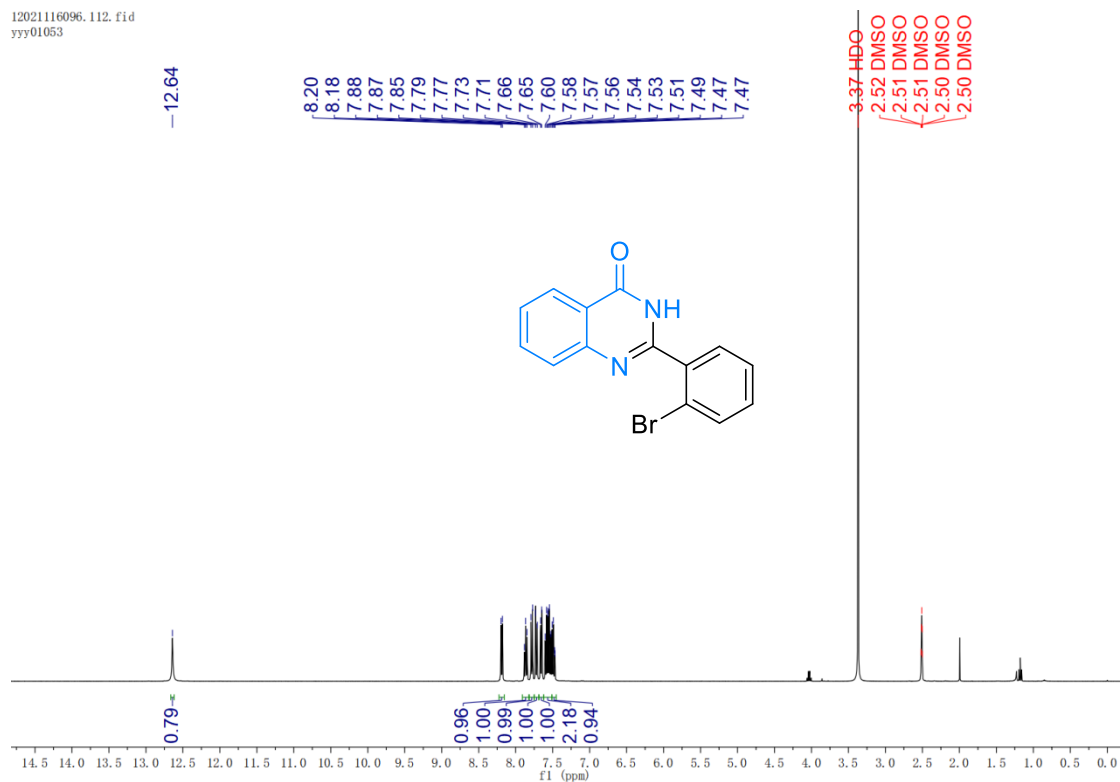

### <sup>1</sup>H-NMR (400 MHz, DMSO-*d*<sub>6</sub>) Spectra of compound 51

12021116096.113.fid  
yyy01053

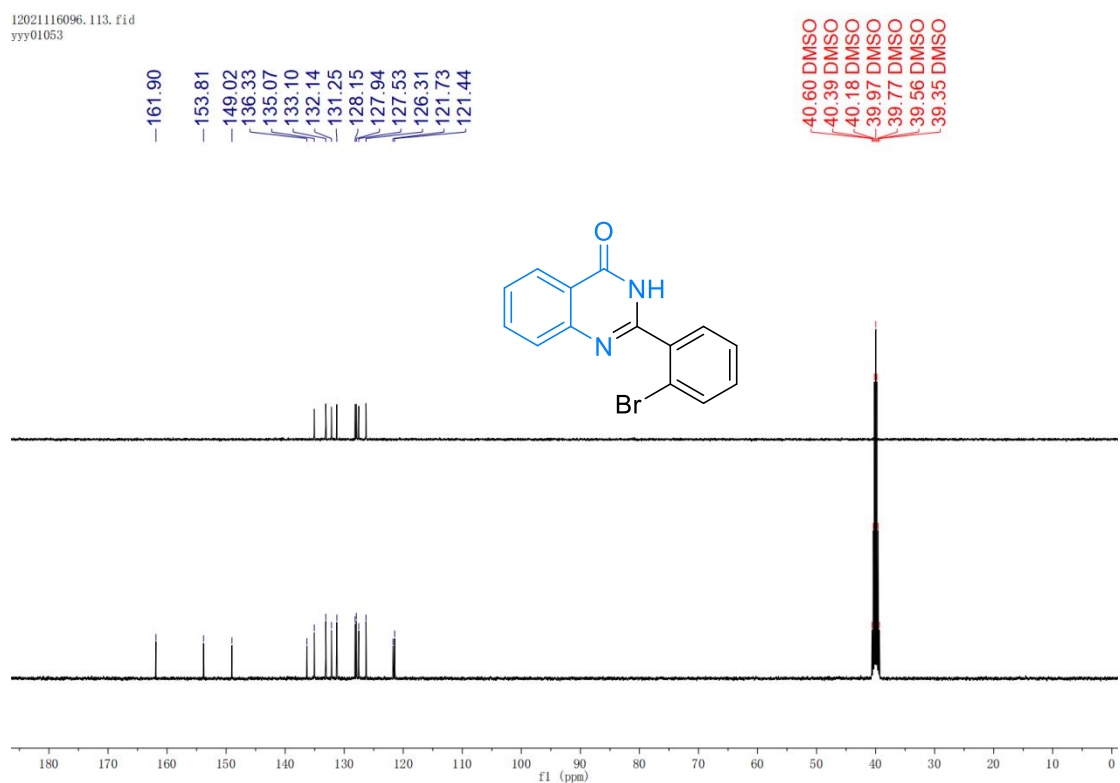

### <sup>13</sup>C-NMR (100 MHz, DMSO-*d*<sub>6</sub>) Spectra of compound 51

12021116096.25.fid  
yyy01063-1

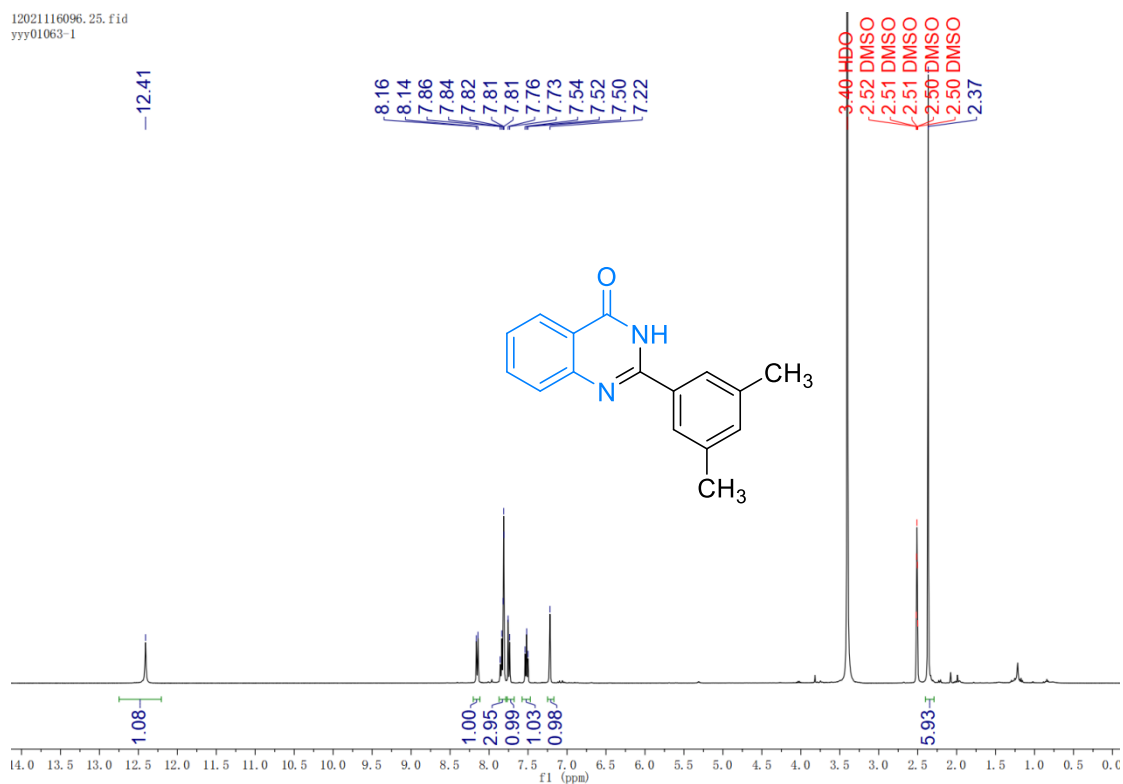

### <sup>1</sup>H-NMR (400 MHz, DMSO-*d*<sub>6</sub>) Spectra of compound 5m

12021116096.26.fid  
yyy01063-1

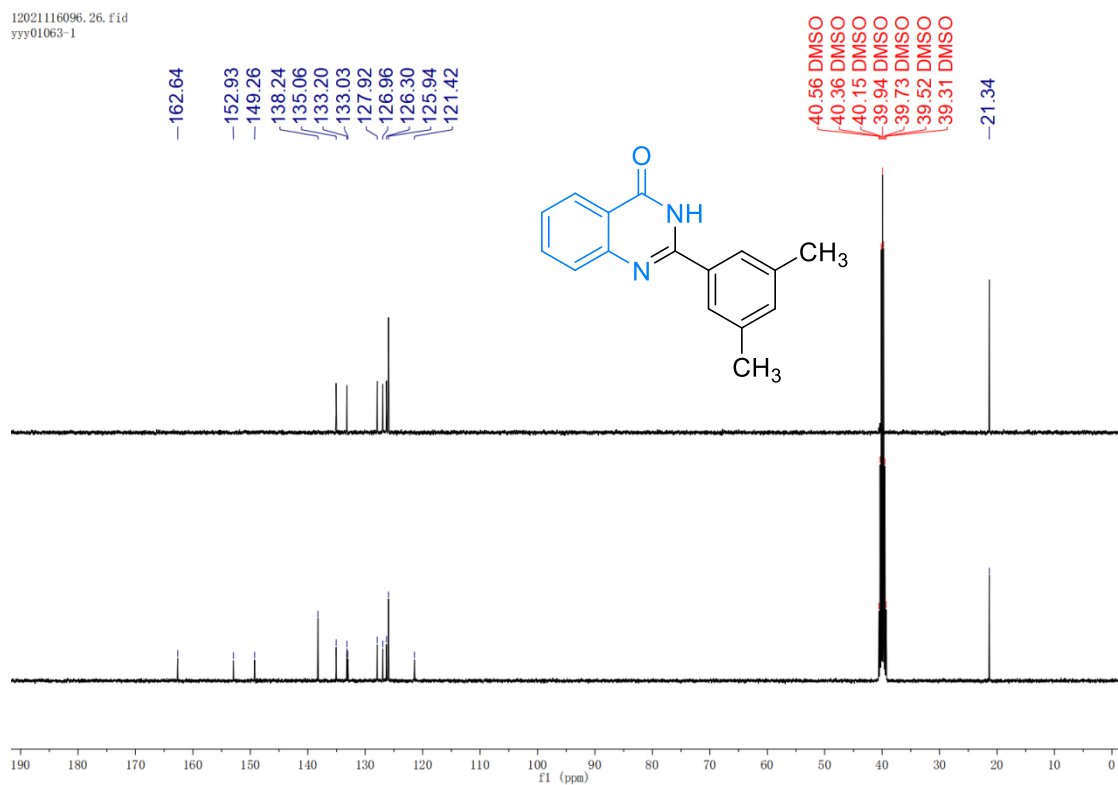

### <sup>13</sup>C-NMR (100 MHz, DMSO-*d*<sub>6</sub>) Spectra of compound 5m

12021116096.100.fid  
yyy01141

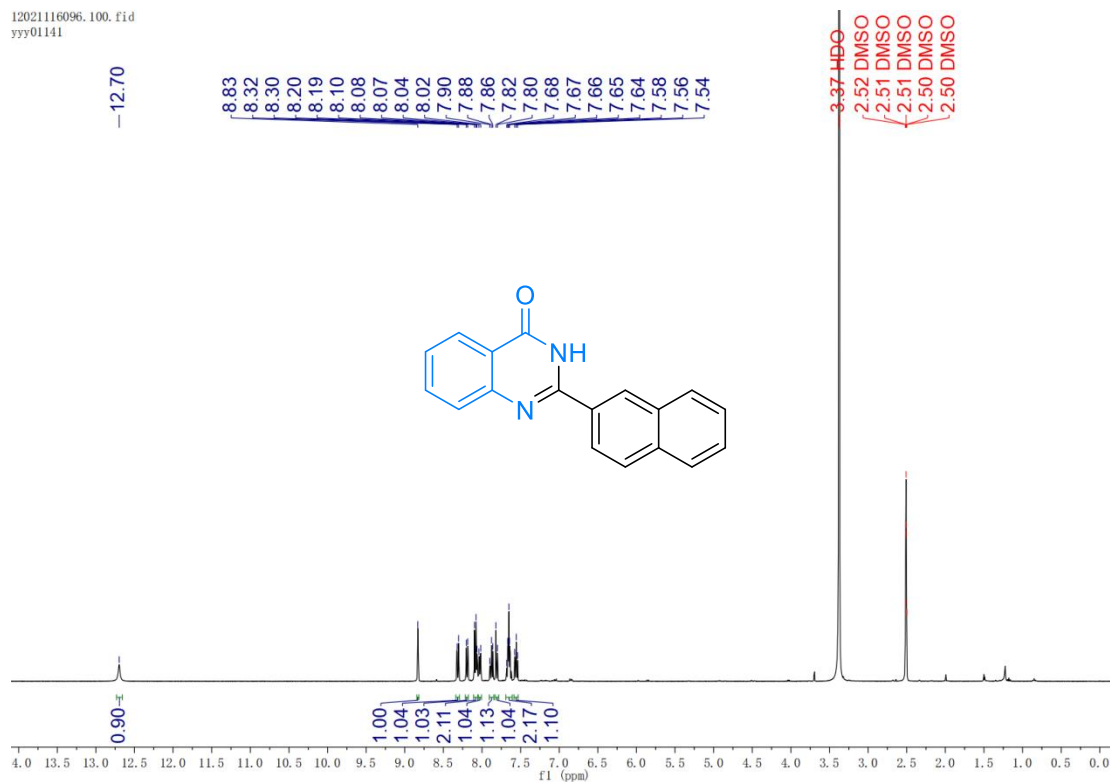

### <sup>1</sup>H-NMR (400 MHz, DMSO-*d*<sub>6</sub>) Spectra of compound 5n

12021116096.21.fid  
yyy01141

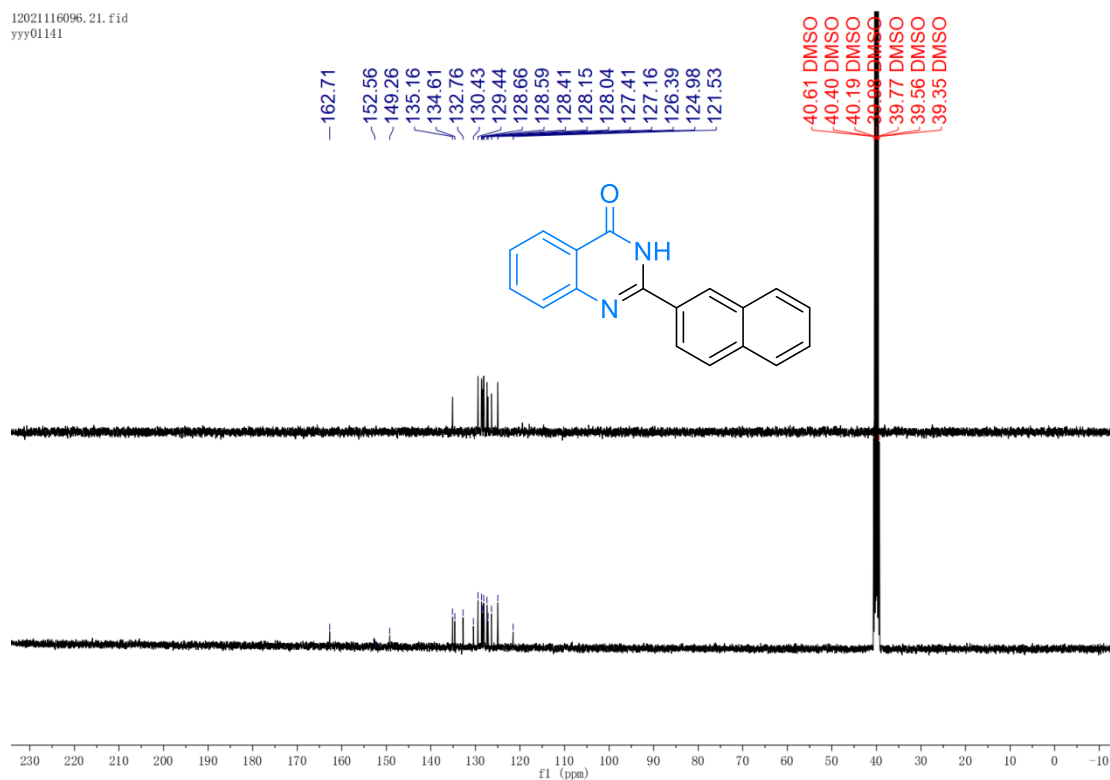

### <sup>13</sup>C-NMR (100 MHz, DMSO-*d*<sub>6</sub>) Spectra of compound 5n

12021116096.139.fid  
yyy01208

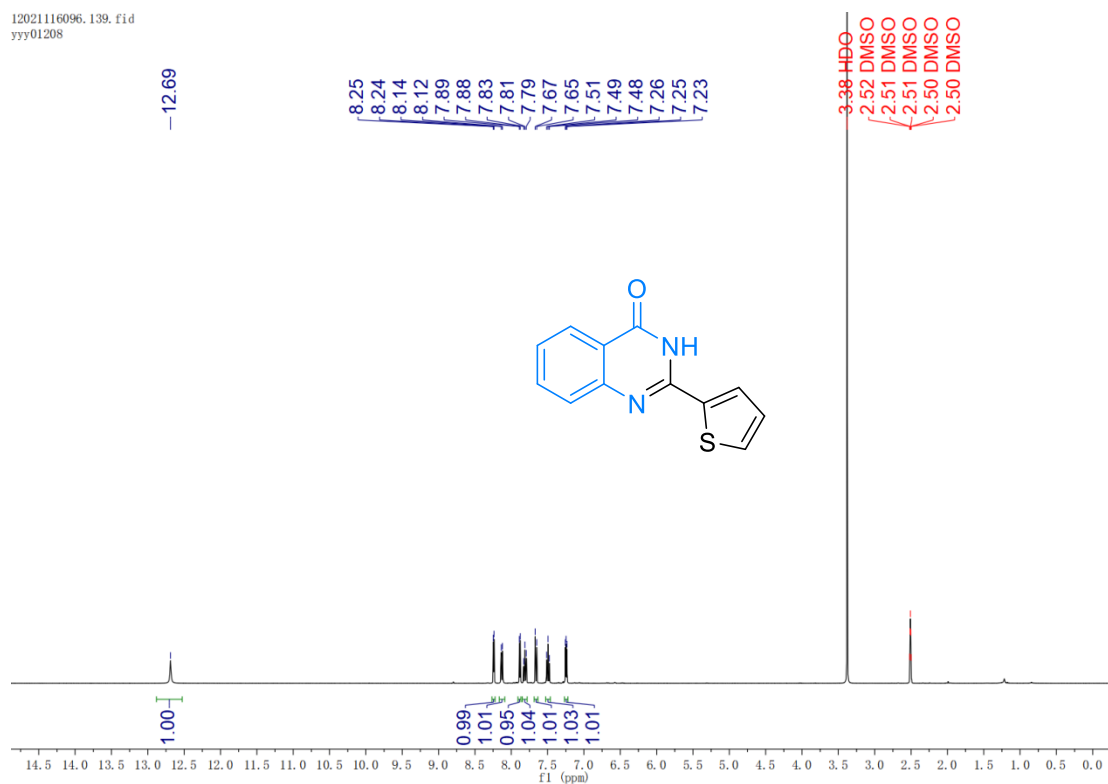

### <sup>1</sup>H-NMR (400 MHz, DMSO-*d*<sub>6</sub>) Spectra of compound 5

12021116096.30.fid  
yyy01208

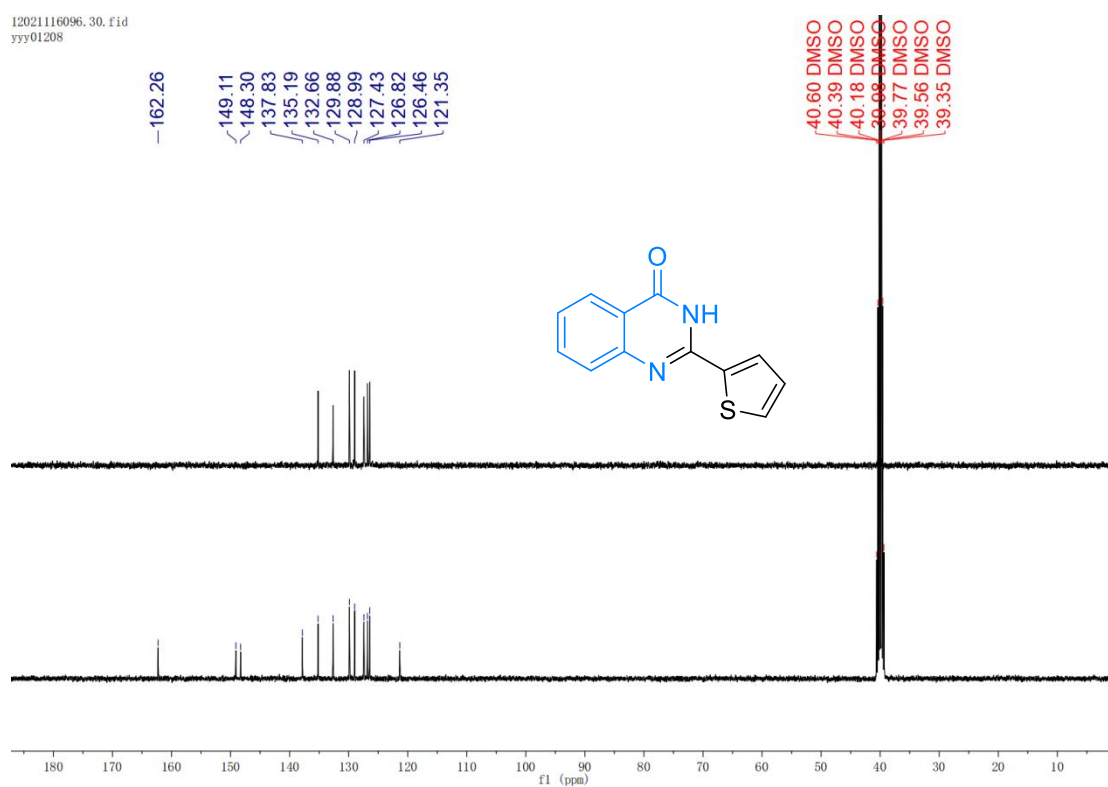

### <sup>13</sup>C-NMR (100 MHz, DMSO-*d*<sub>6</sub>) Spectra of compound 5

12021116096.79.fid  
yyy01101

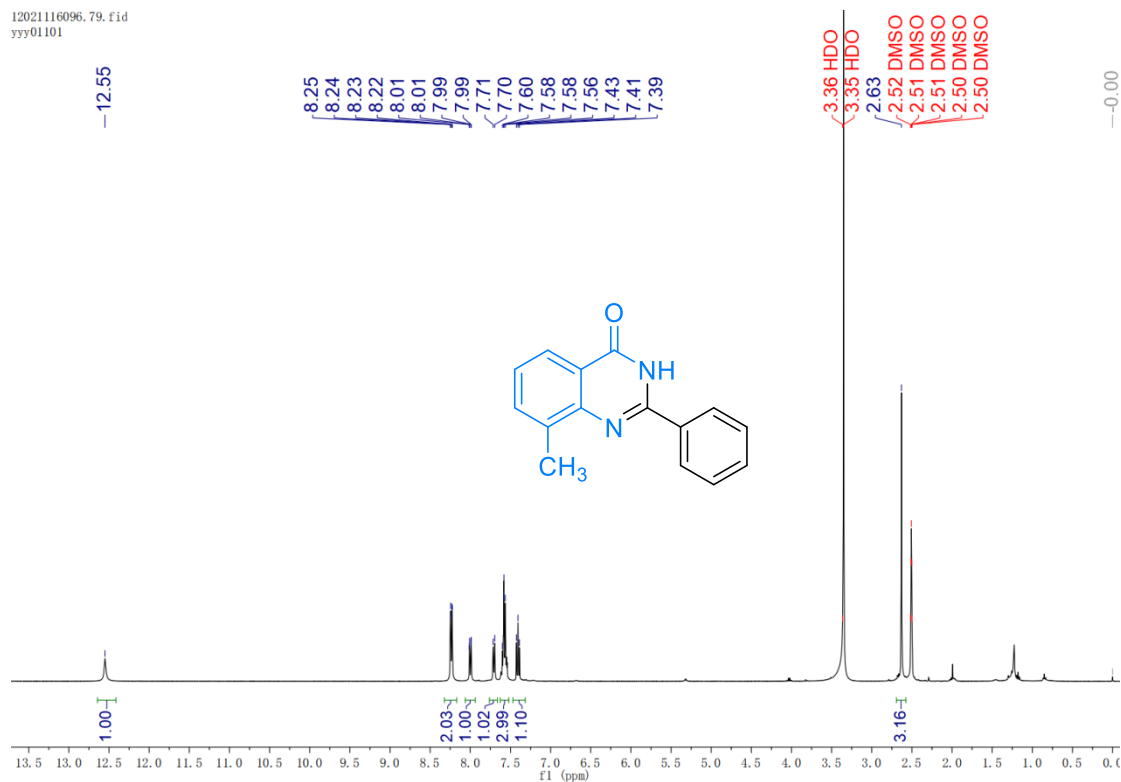

### <sup>1</sup>H-NMR (400 MHz, DMSO-*d*<sub>6</sub>) Spectra of compound 5p

12021116096.80.fid  
yyy01101

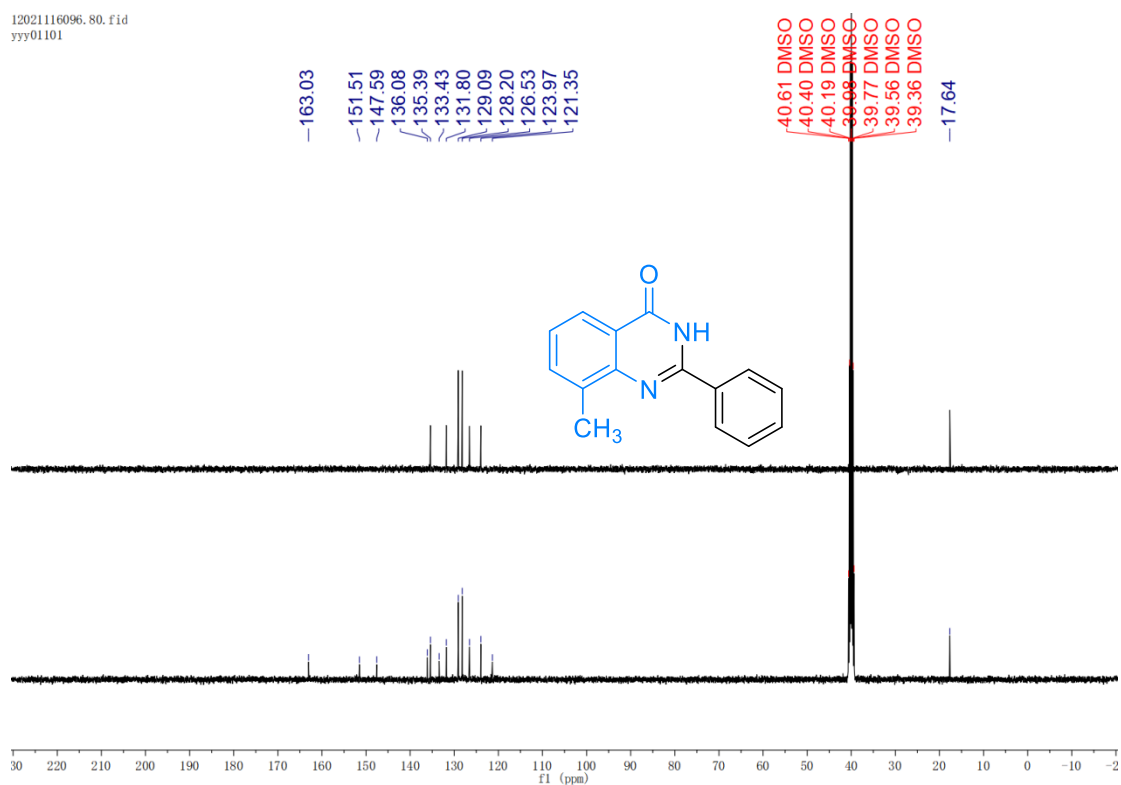

### <sup>13</sup>C-NMR (100 MHz, DMSO-*d*<sub>6</sub>) Spectra of compound 5p

12021116096.23.fid  
yyy01135

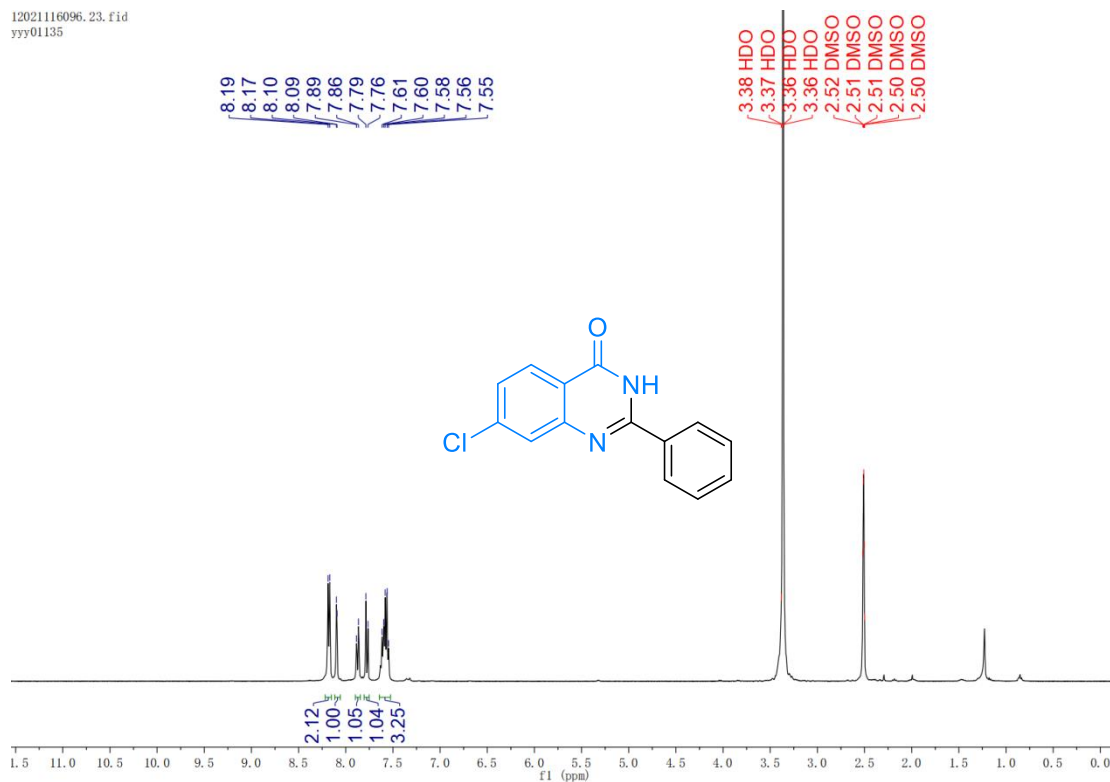

### <sup>1</sup>H-NMR (400 MHz, DMSO-*d*<sub>6</sub>) Spectra of compound 5q

12021116096.24.fid  
yyy01135

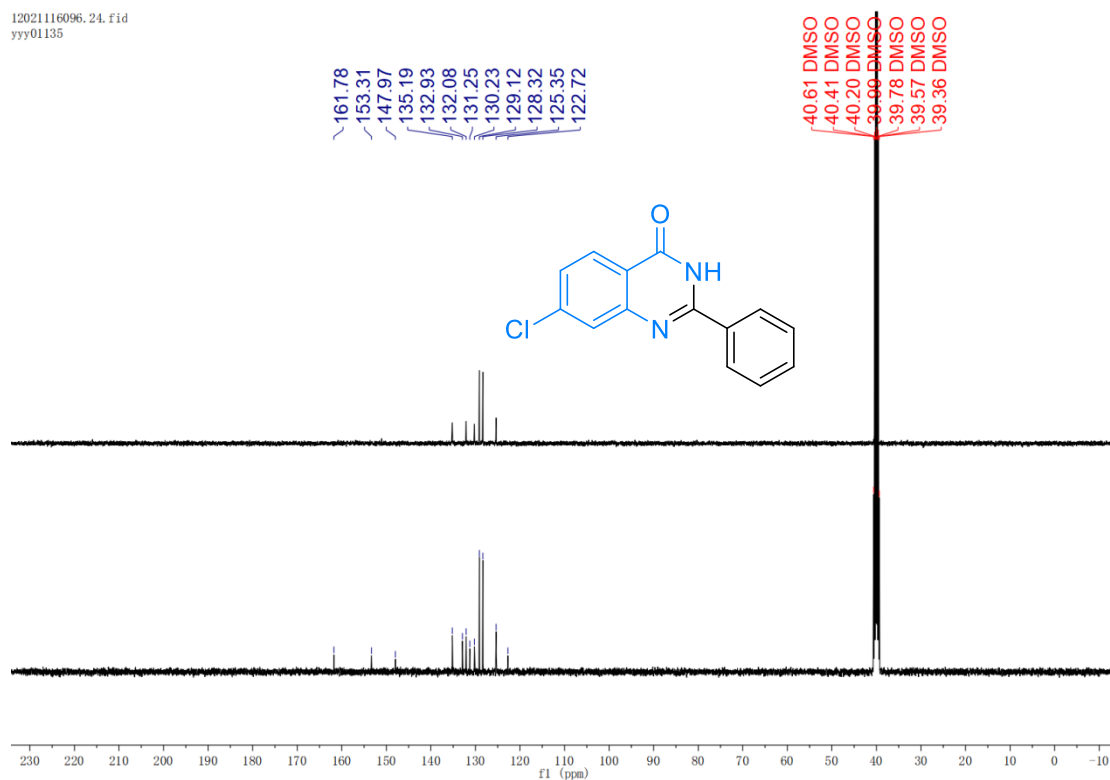

### <sup>13</sup>C-NMR (100 MHz, DMSO-*d*<sub>6</sub>) Spectra of compound 5q

12021116096.76.fid  
yyy01100

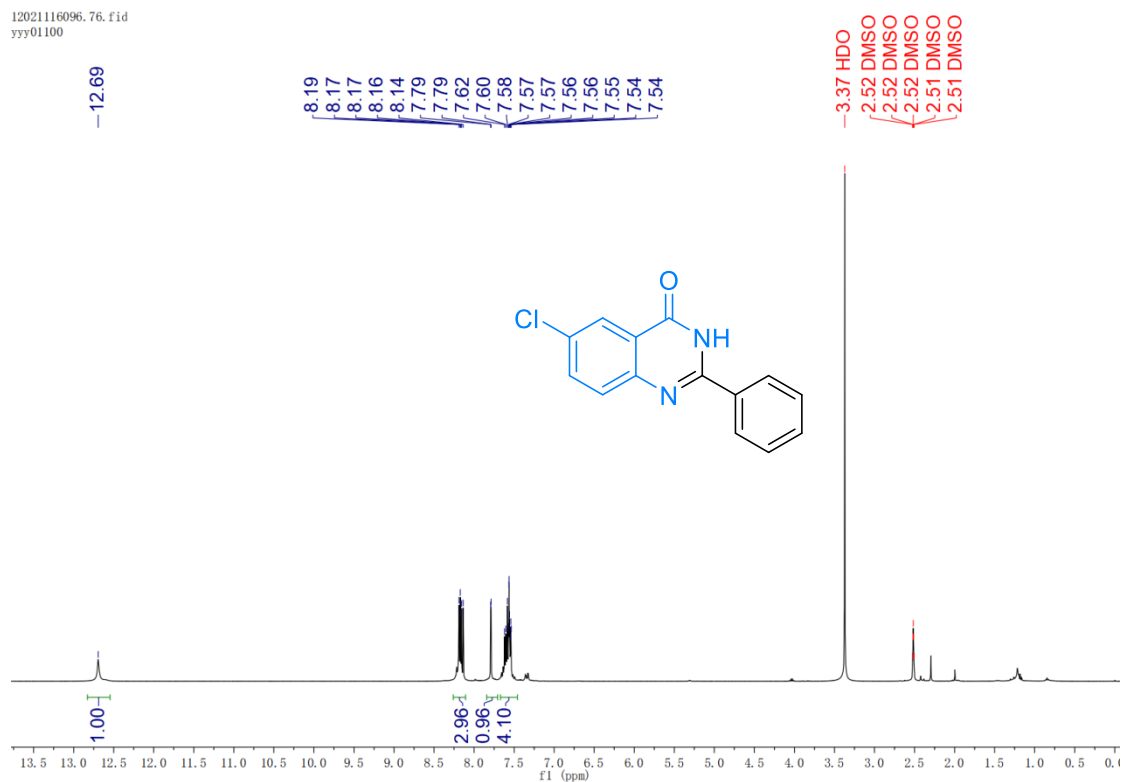

### <sup>1</sup>H-NMR (400 MHz, DMSO-*d*<sub>6</sub>) Spectra of compound 5r

12021116096.77.fid  
yyy01100

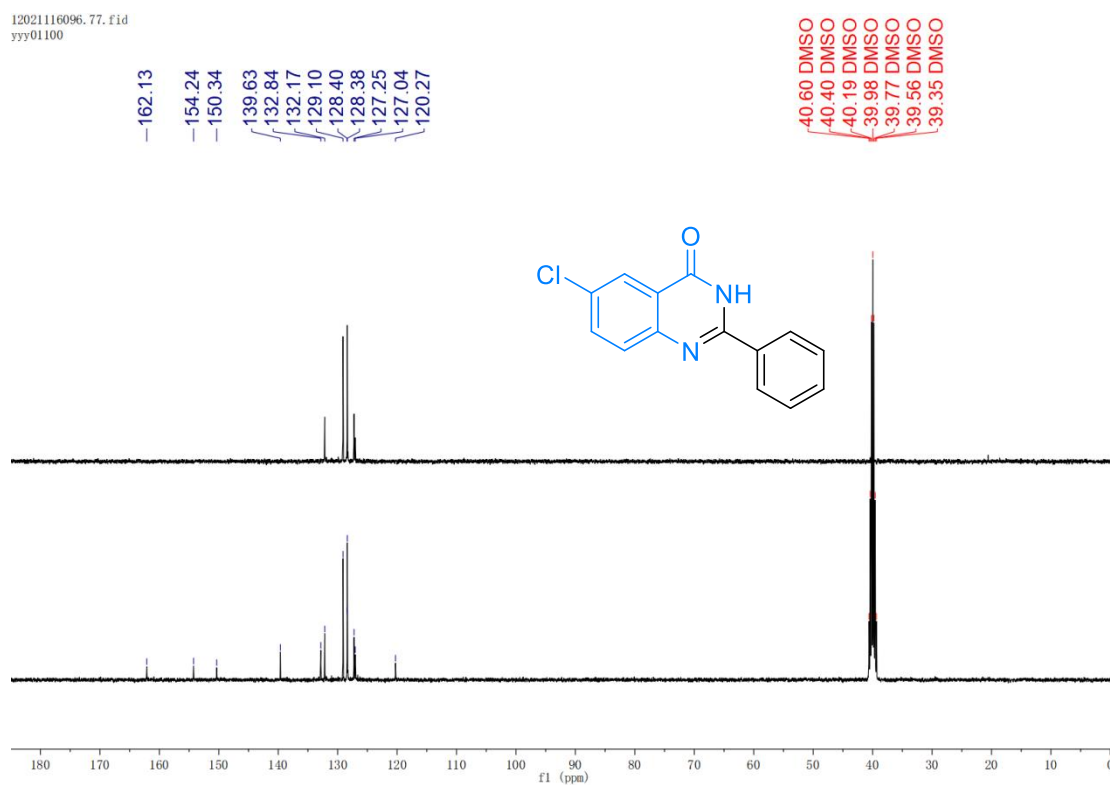

### <sup>13</sup>C-NMR (100 MHz, DMSO-*d*<sub>6</sub>) Spectra of compound 5r



12021116096.184.fid  
yyy01330

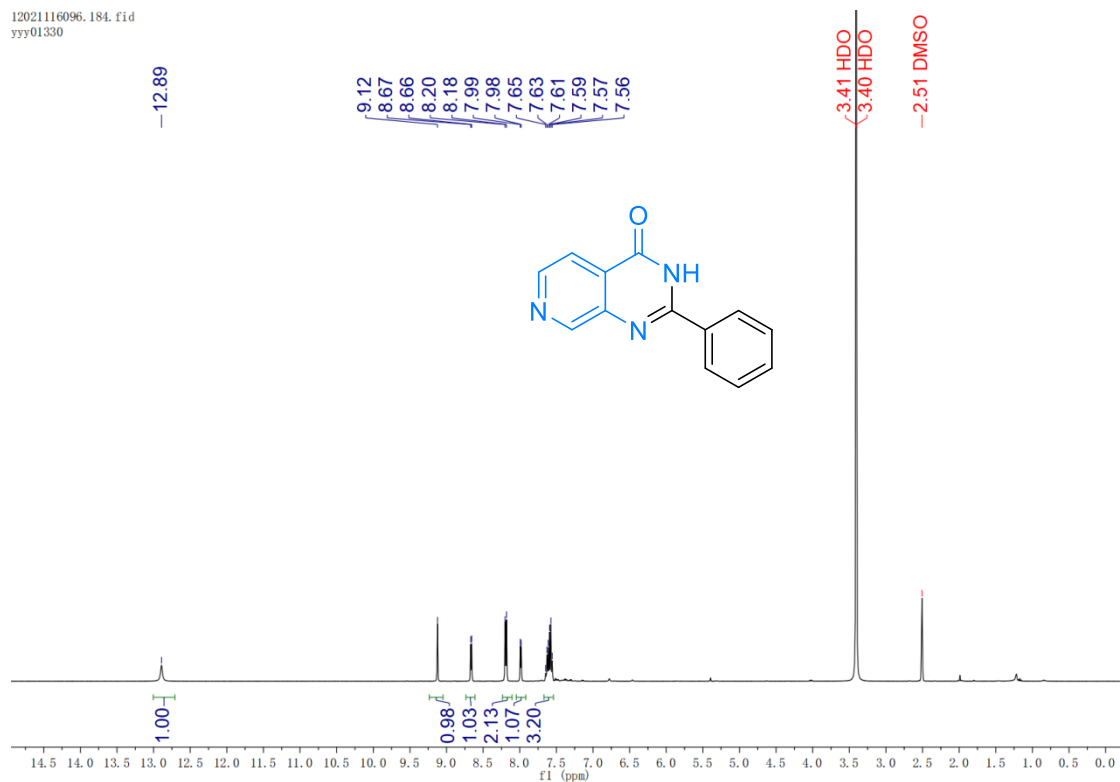

### <sup>1</sup>H-NMR (400 MHz, DMSO-*d*<sub>6</sub>) Spectra of compound 5s

12021116096.185.fid  
yyy01330

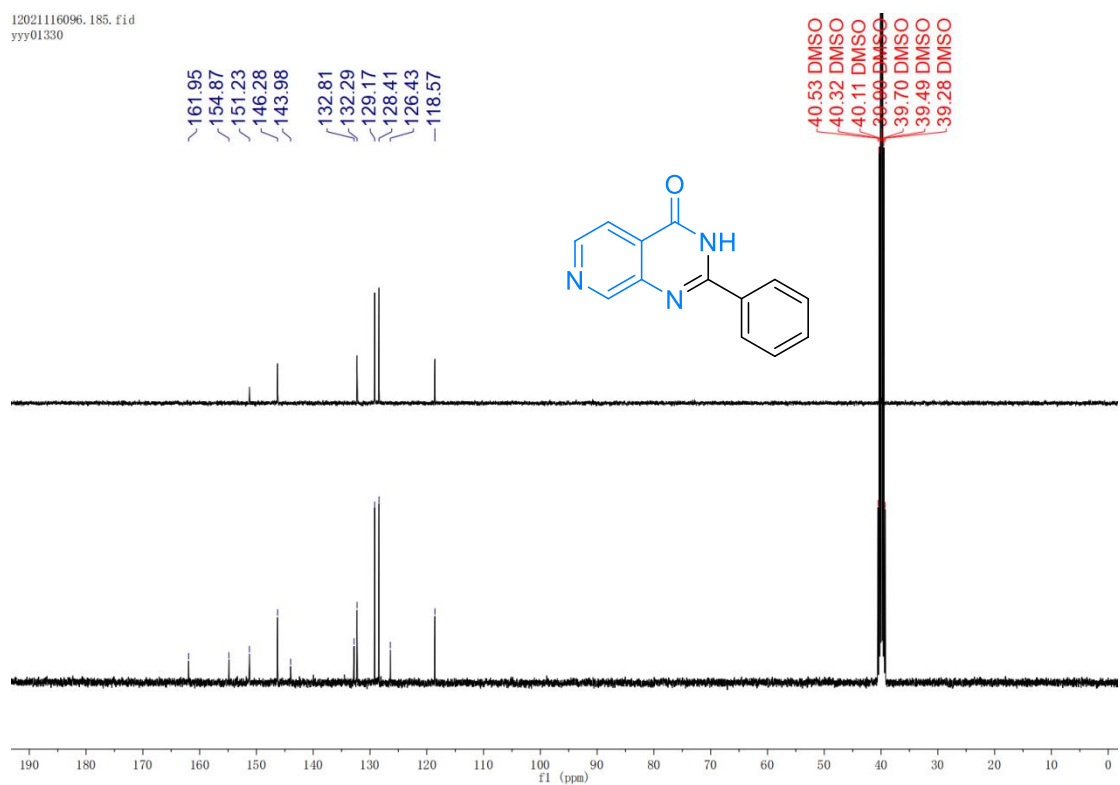

### <sup>13</sup>C-NMR (100 MHz, DMSO-*d*<sub>6</sub>) Spectra of compound 5s

12021116096.106.fid  
yyy01139

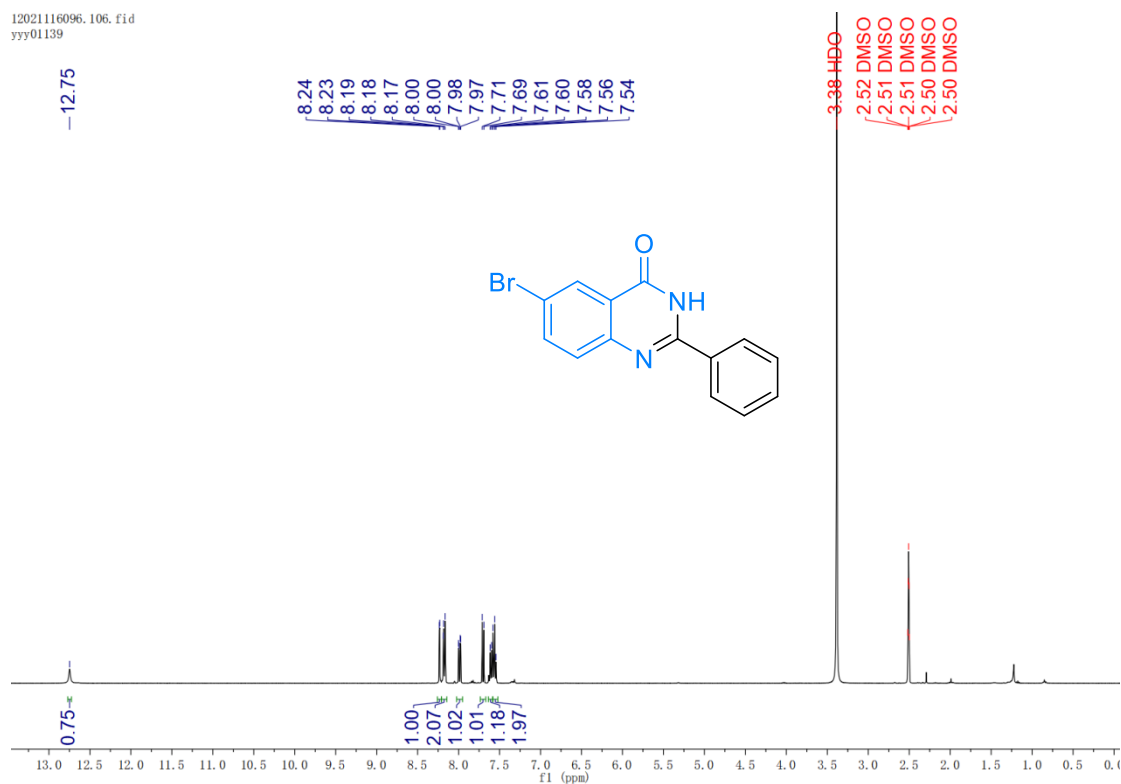

### <sup>1</sup>H-NMR (400 MHz, DMSO-*d*<sub>6</sub>) Spectra of compound 5t

12021116096.107.fid  
yyy01139

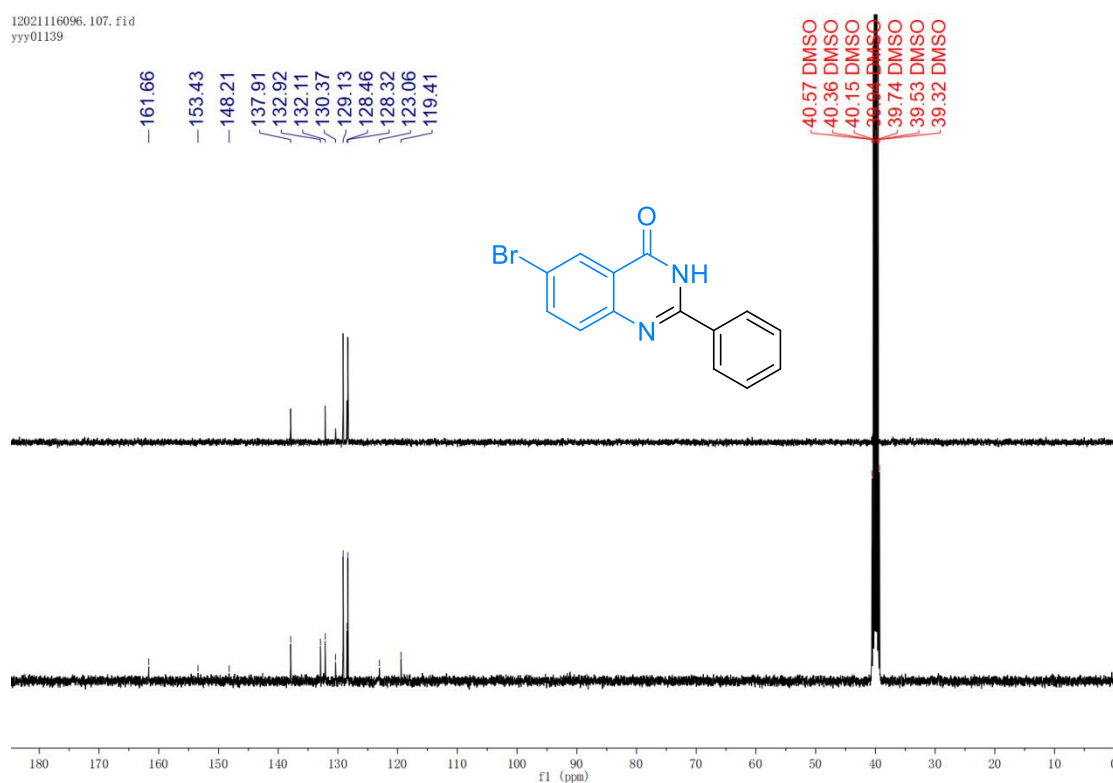

### <sup>13</sup>C-NMR (100 MHz, DMSO-*d*<sub>6</sub>) Spectra of compound 5t

12021116096.141.fid  
yyy01218

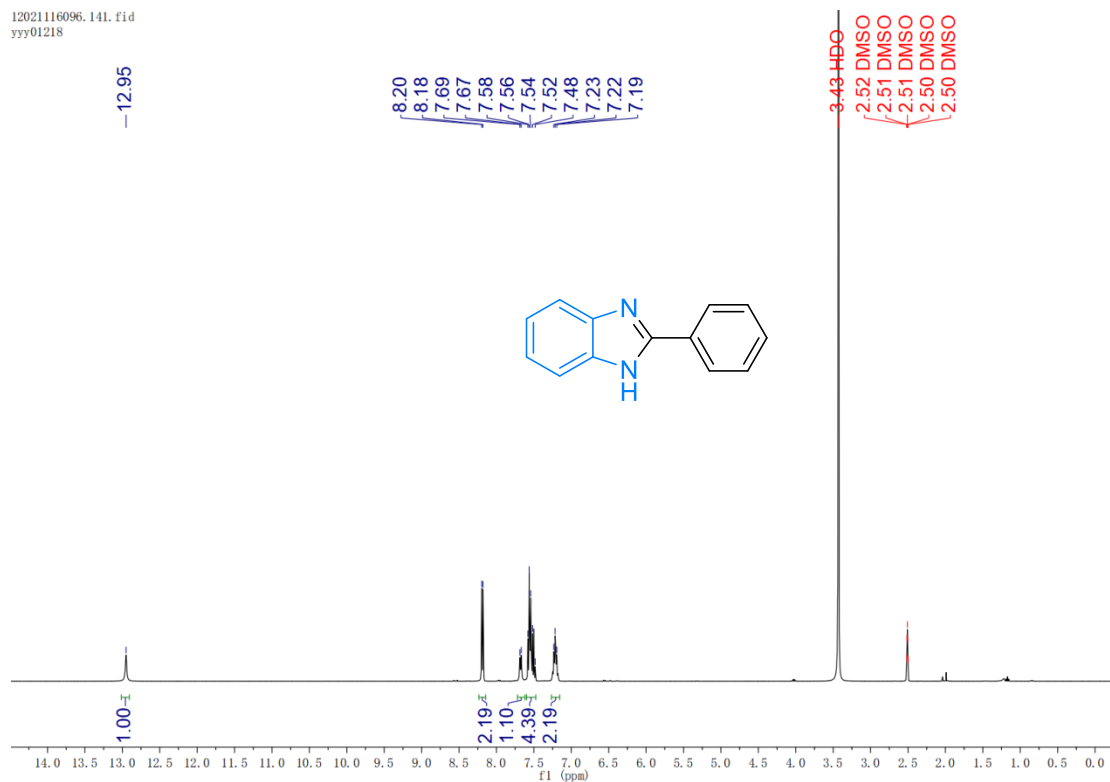

### <sup>1</sup>H-NMR (400 MHz, DMSO-*d*<sub>6</sub>) Spectra of compound 6a

12021116096.33.fid  
yyy01218

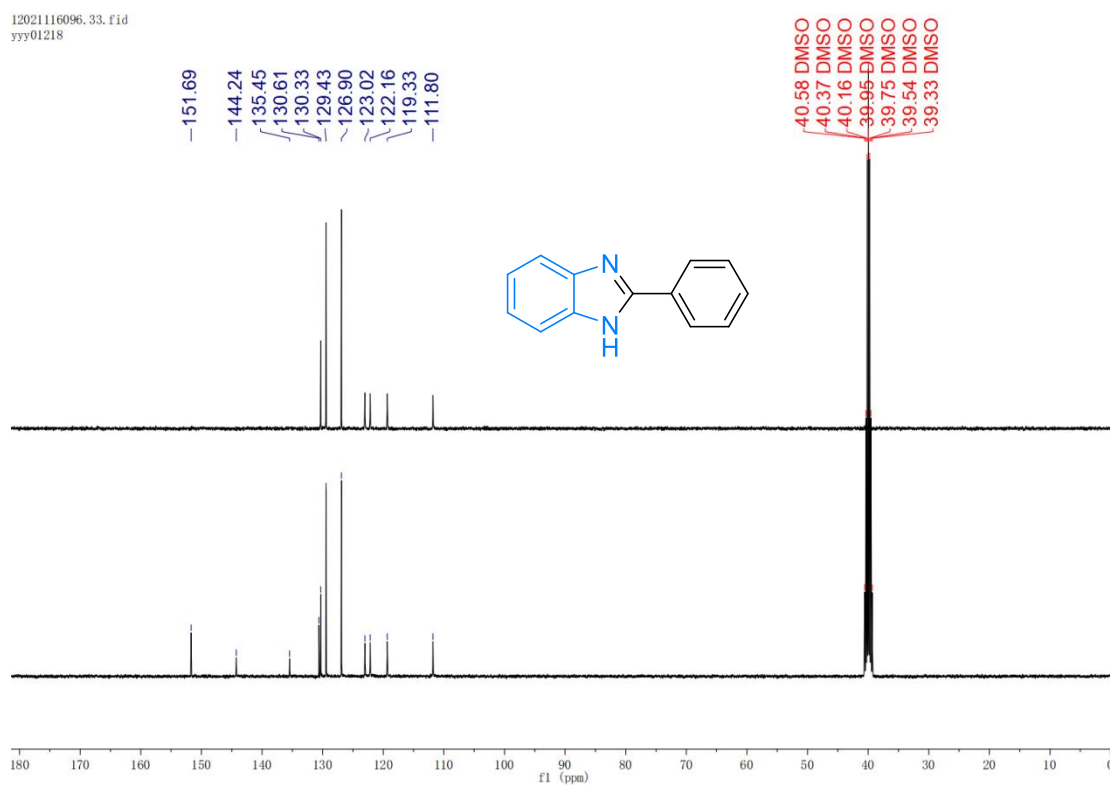

### <sup>13</sup>C-NMR (100 MHz, DMSO-*d*<sub>6</sub>) Spectra of compound 6a

12021116096.187.fid  
yyy01328-2

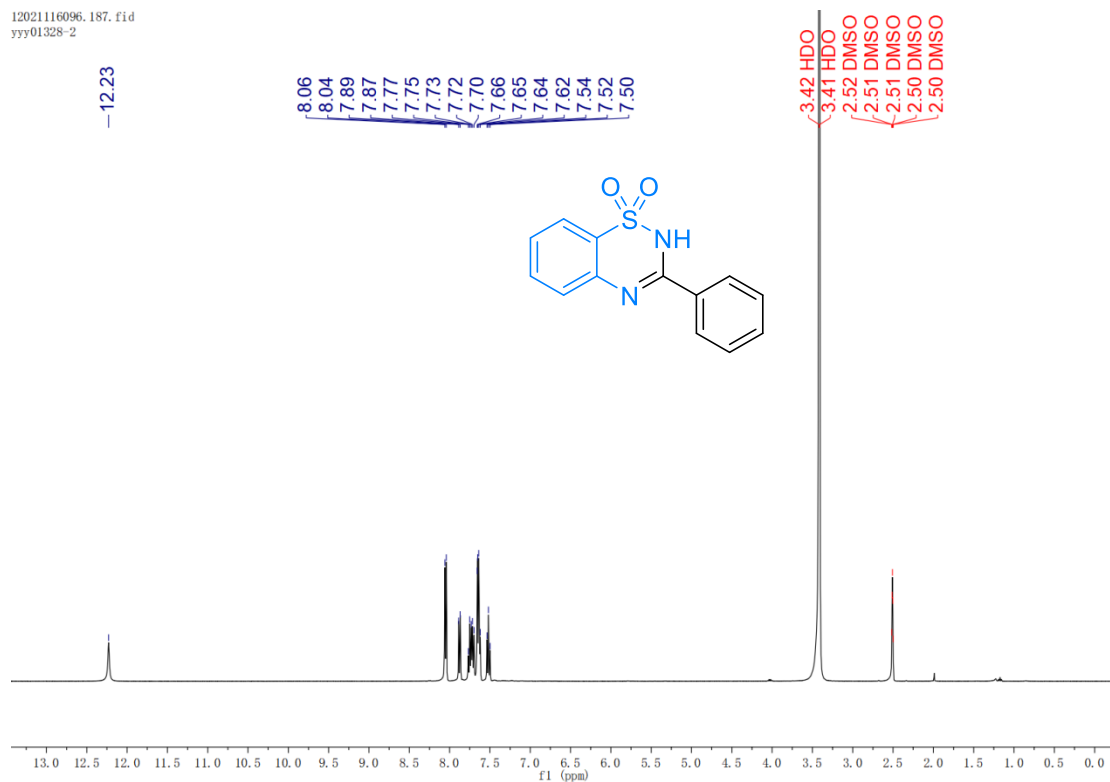

### <sup>1</sup>H-NMR (400 MHz, DMSO-*d*<sub>6</sub>) Spectra of compound 6b

12021116096.188.fid  
yyy01328-2

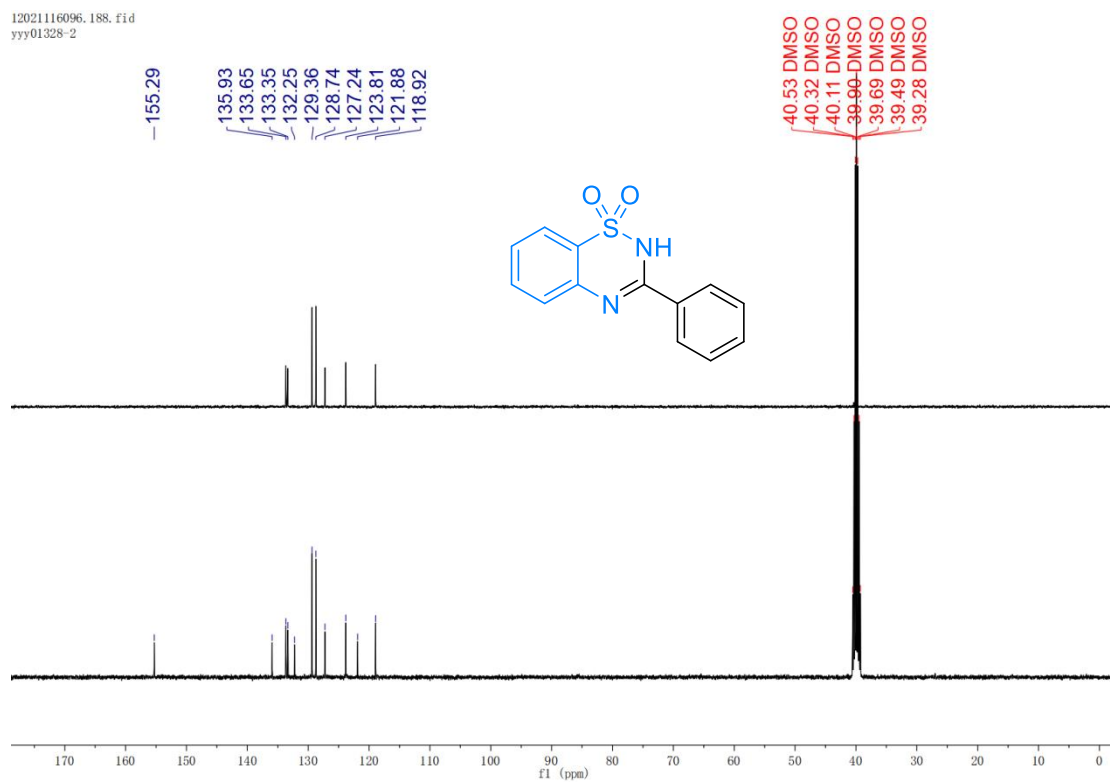

### <sup>13</sup>C-NMR (100 MHz, DMSO-*d*<sub>6</sub>) Spectra of compound 6b

12021116096.182.fid  
yyy01328

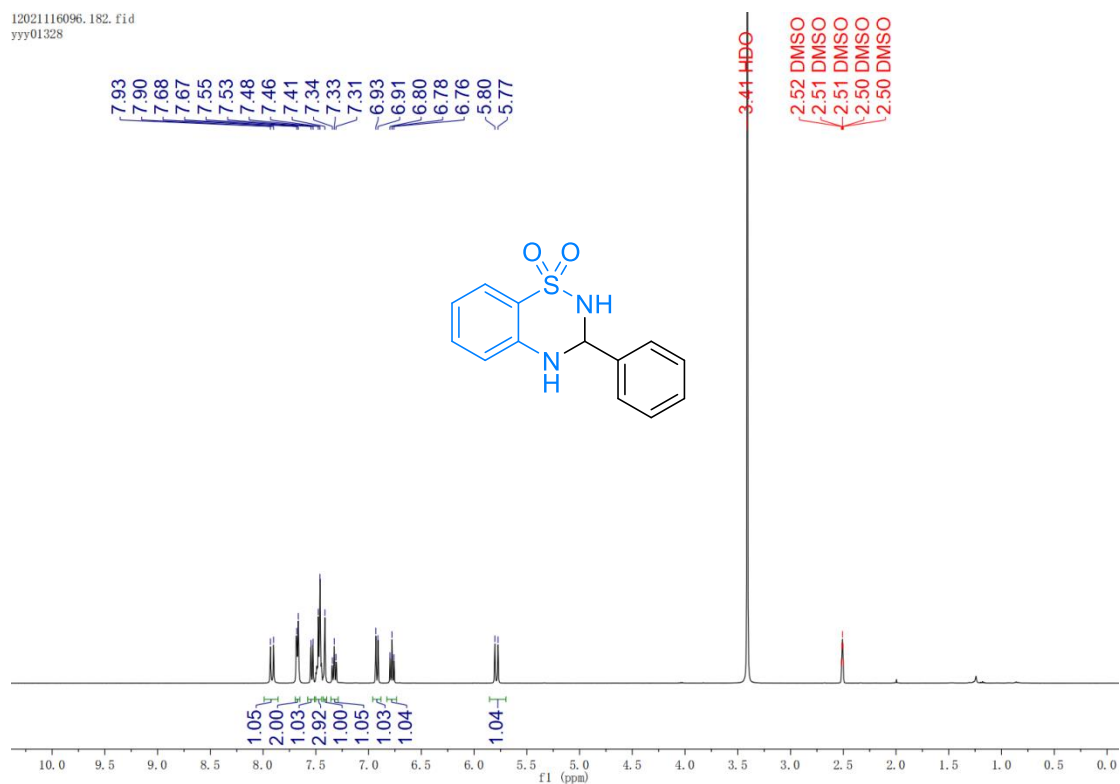

### <sup>1</sup>H-NMR (400 MHz, DMSO-*d*<sub>6</sub>) Spectra of compound 6b'

12021116096.183.fid  
yyy01328

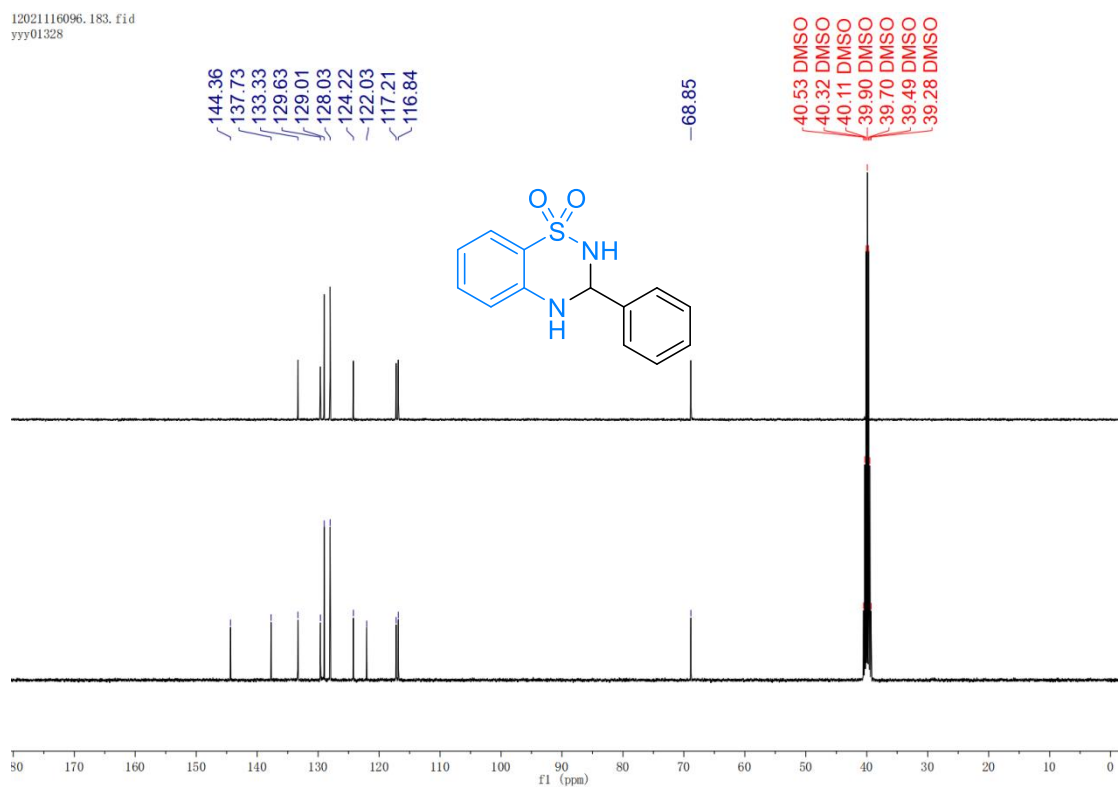

### <sup>13</sup>C-NMR (100 MHz, DMSO-*d*<sub>6</sub>) Spectra of compound 6b'

12021116096.191.fid  
yyy01341

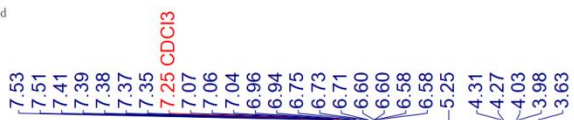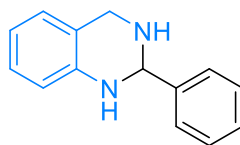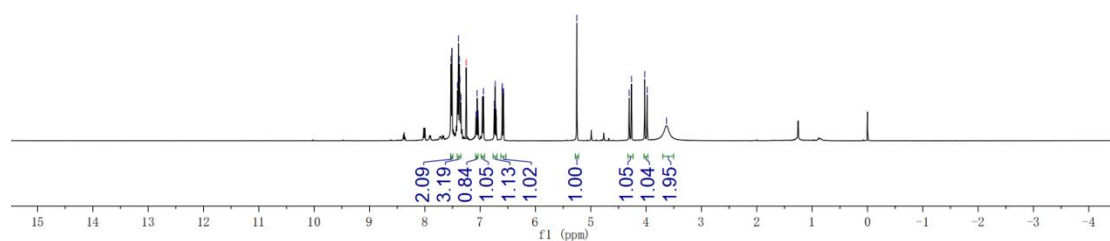

### <sup>1</sup>H-NMR (400 MHz, Chloroform-*d*) Spectra of compound 6c

12021116096.193.fid  
yyy01341

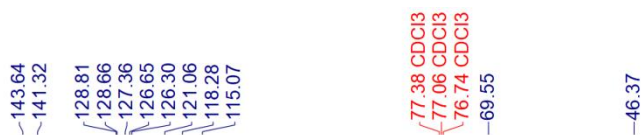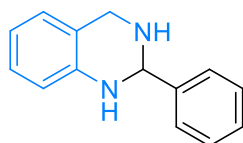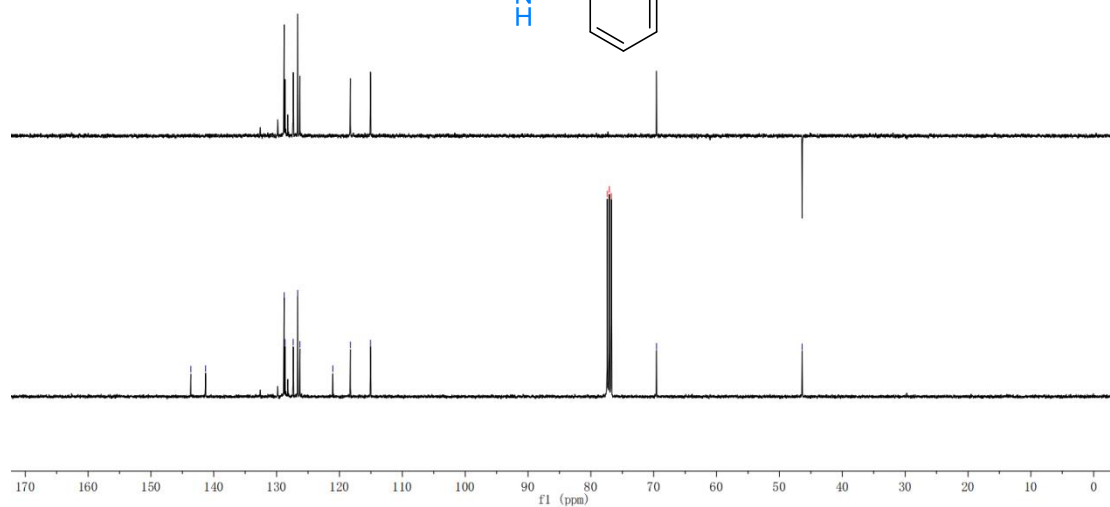

### <sup>13</sup>C-NMR (100 MHz, Chloroform-*d*) Spectra of compound 6c

12021116096\_39.fid  
yyy01062-1

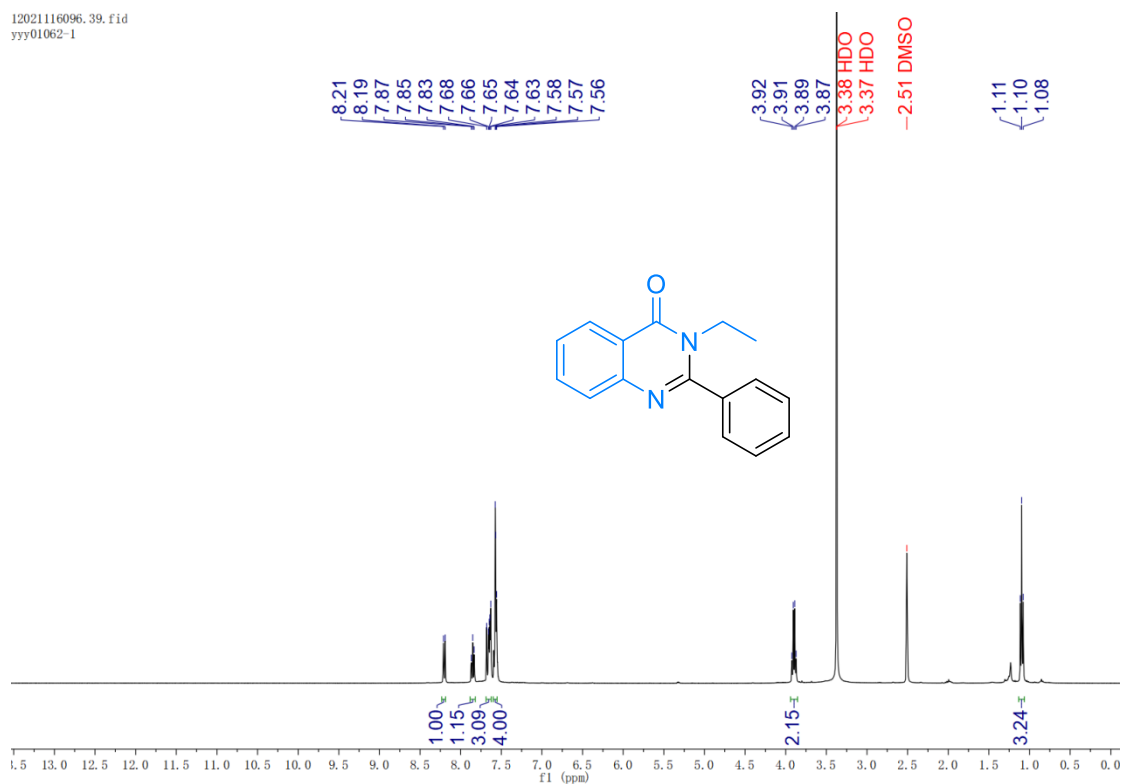

### <sup>1</sup>H-NMR (400 MHz, DMSO-*d*<sub>6</sub>) Spectra of compound 7a

12021116096\_40.fid  
yyy01062-1

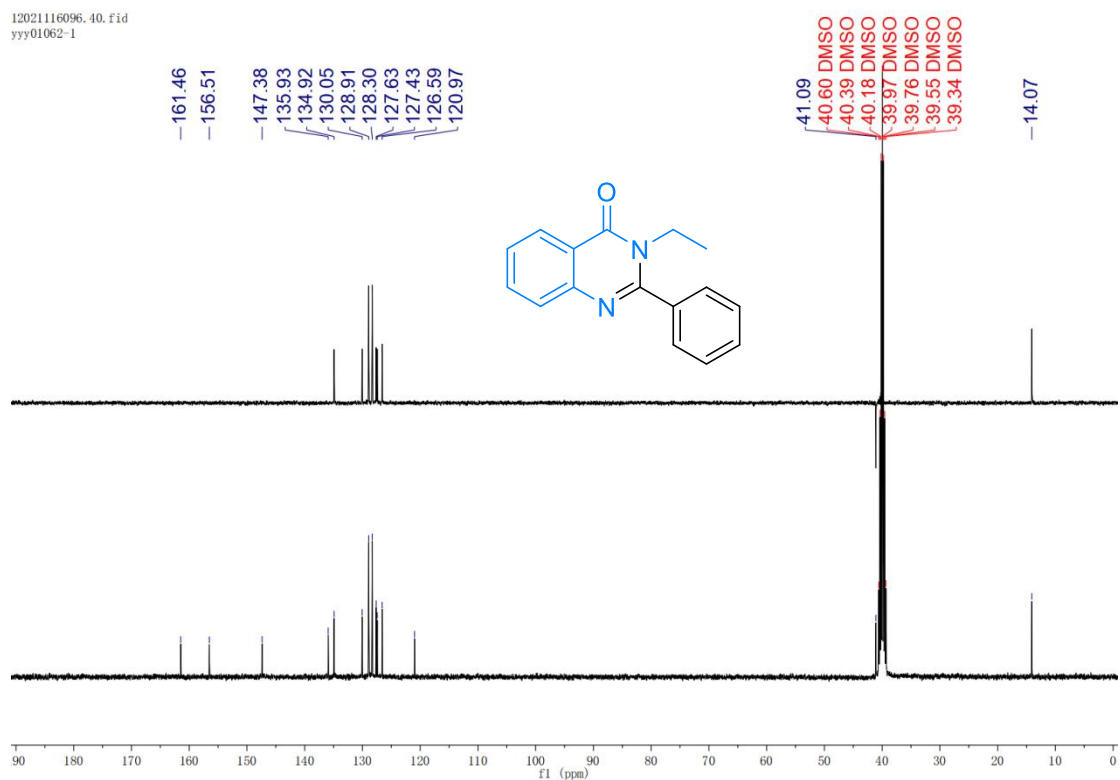

### <sup>13</sup>C-NMR (100 MHz, DMSO-*d*<sub>6</sub>) Spectra of compound 7a

12021116096.70.fid  
yyy01089

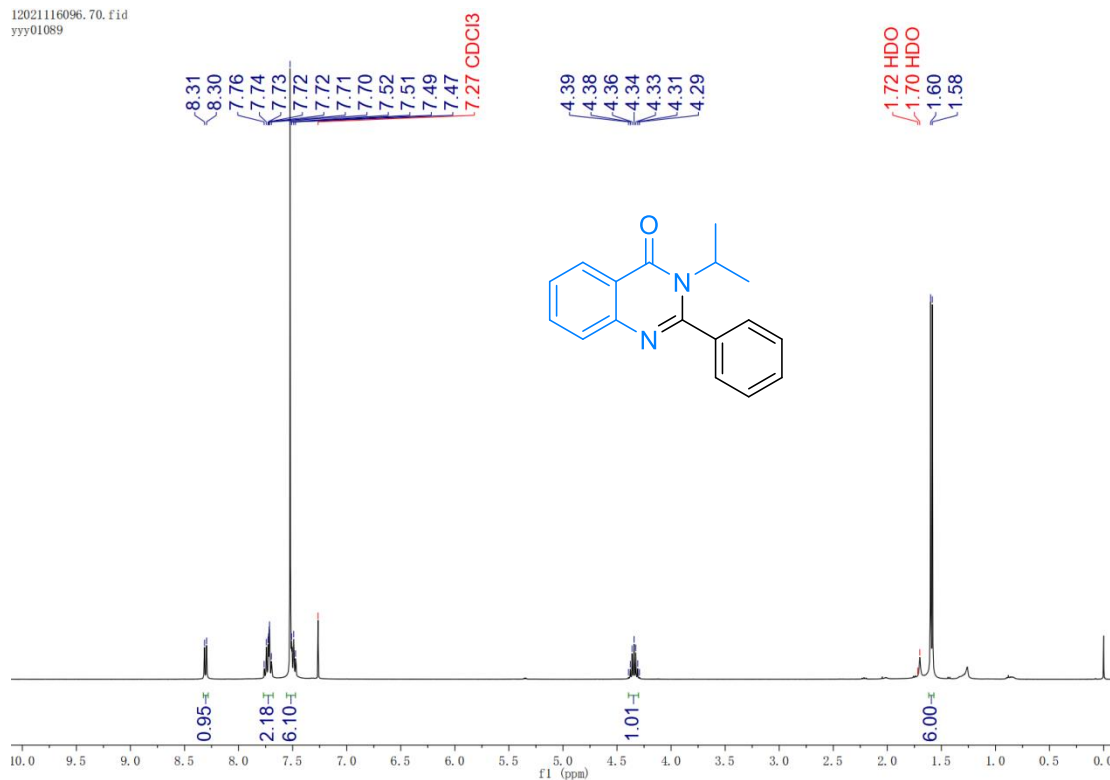

### <sup>1</sup>H-NMR (400 MHz, Chloroform-*d*) Spectra of compound 7b

12021116096.71.fid  
yyy01089

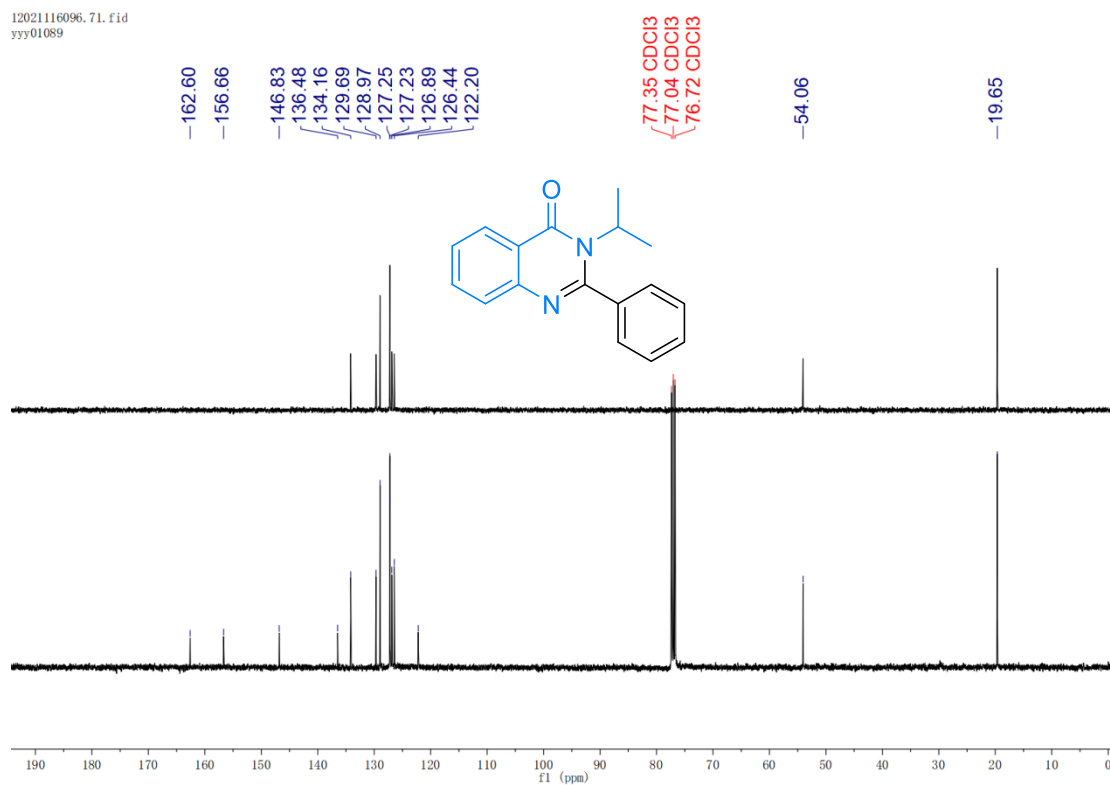

### <sup>13</sup>C-NMR (100 MHz, Chloroform-*d*) Spectra of compound 7b



12021116096.136.fid  
yyy01137

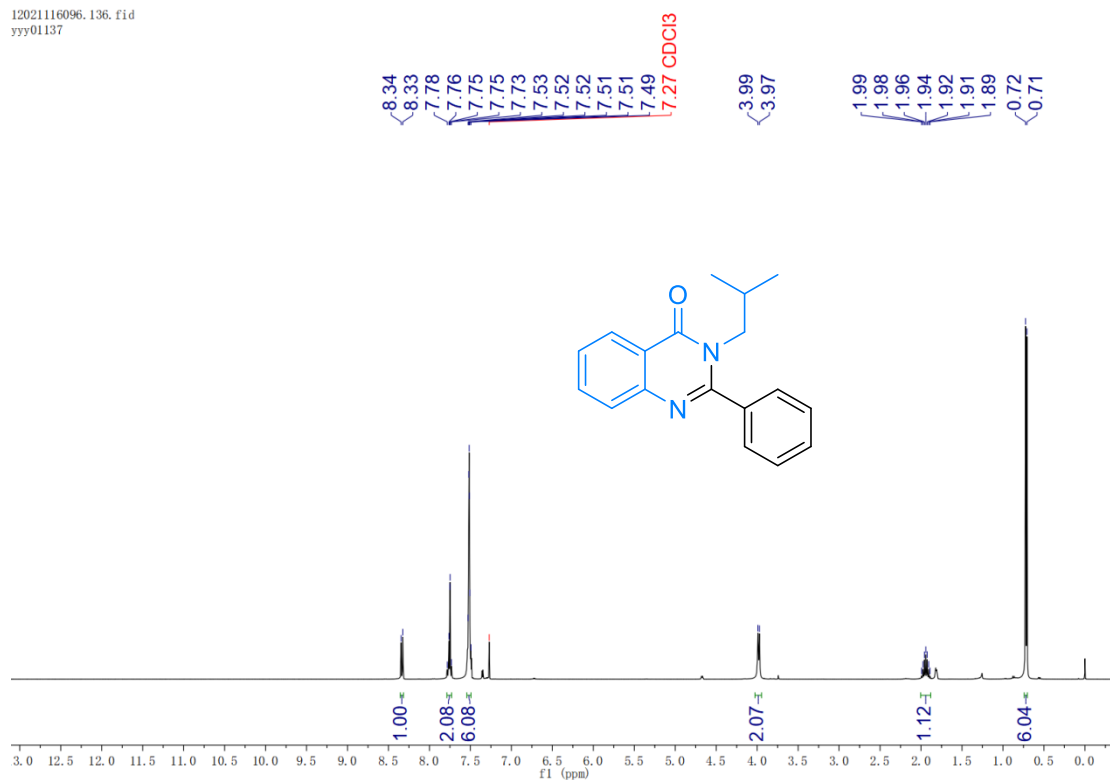

### <sup>1</sup>H-NMR (400 MHz, Chloroform-*d*) Spectra of compound 7c

12021116096.137.fid  
yyy01137

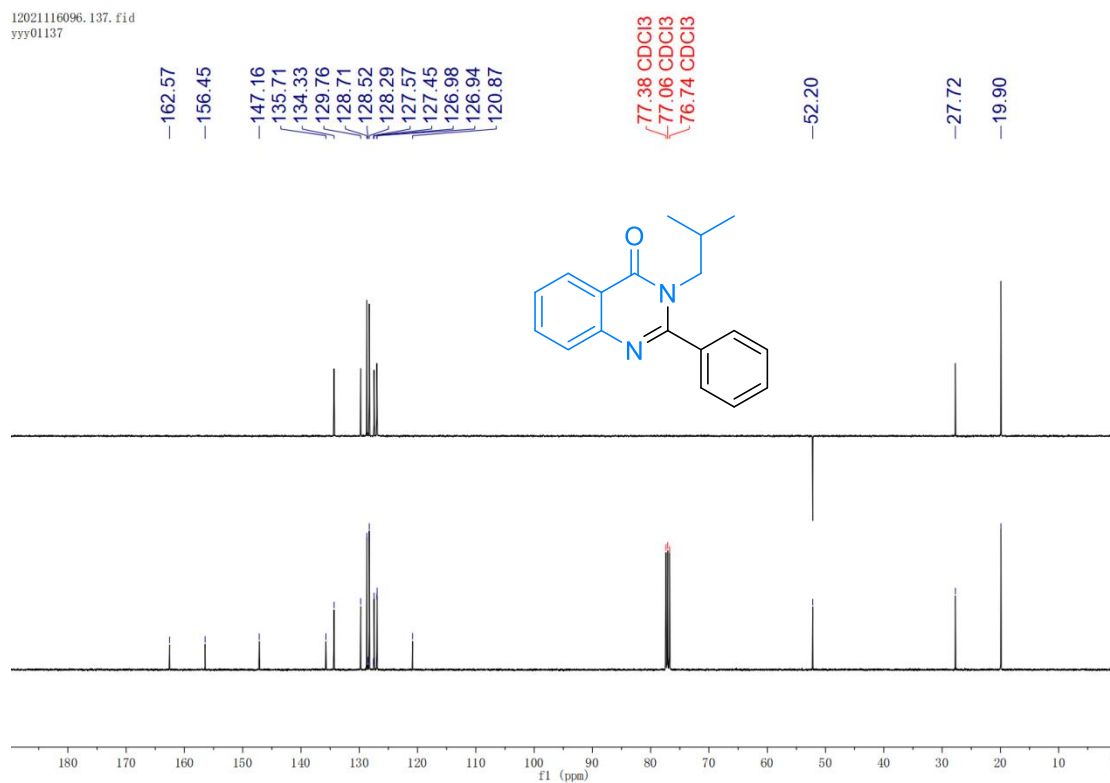

### <sup>13</sup>C-NMR (100 MHz, Chloroform-*d*) Spectra of compound 7c

12021116096.67.fid  
yyy01085

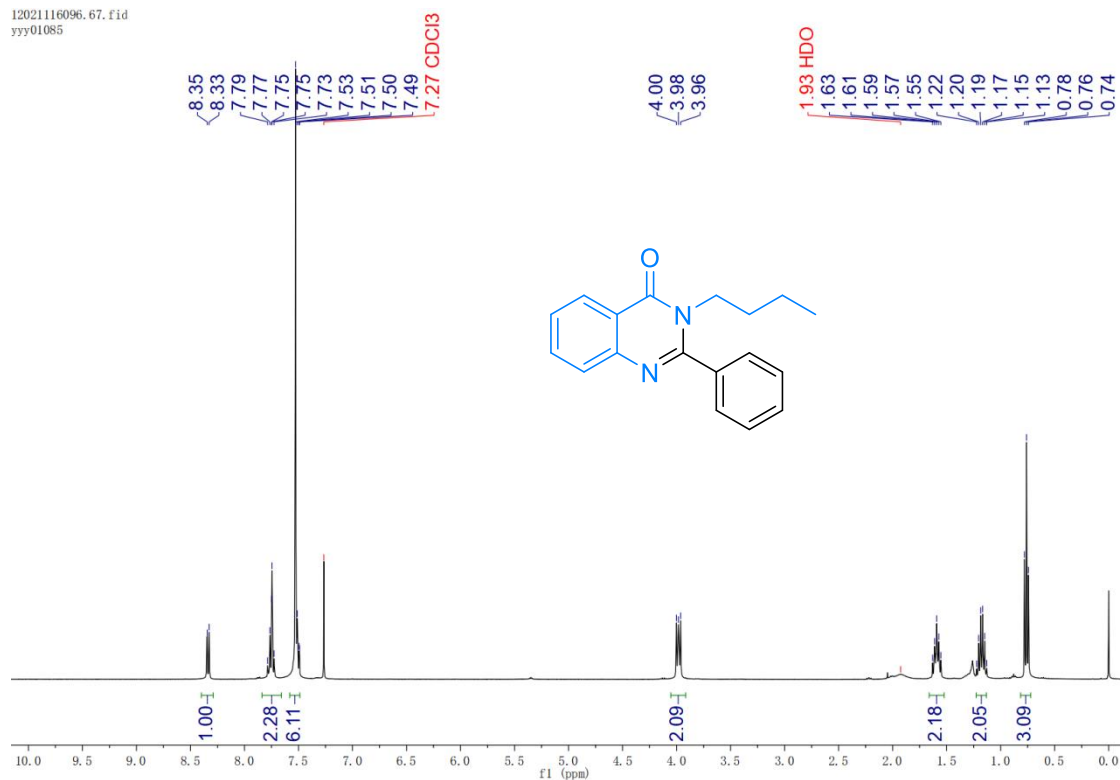

### <sup>1</sup>H-NMR (400 MHz, Chloroform-*d*) Spectra of compound 7d

12021116096.68.fid  
yyy01085

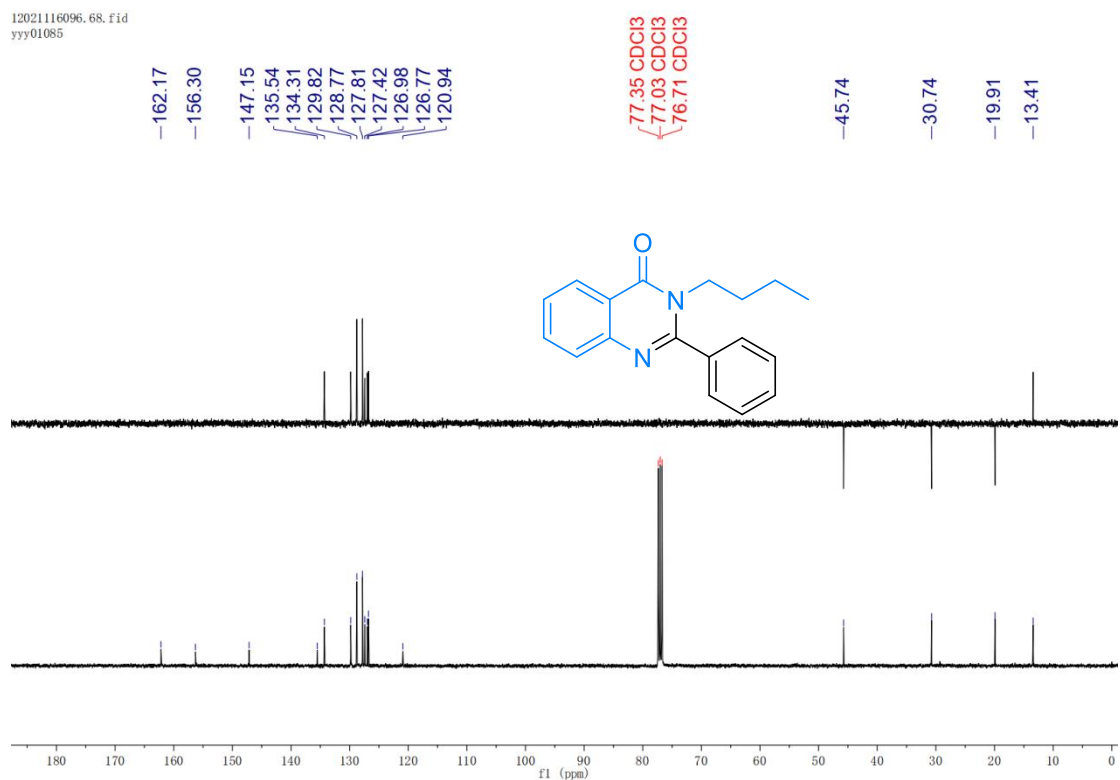

### <sup>13</sup>C-NMR (100 MHz, Chloroform-*d*) Spectra of compound 7d

12021116096.121.fid  
yyy01105

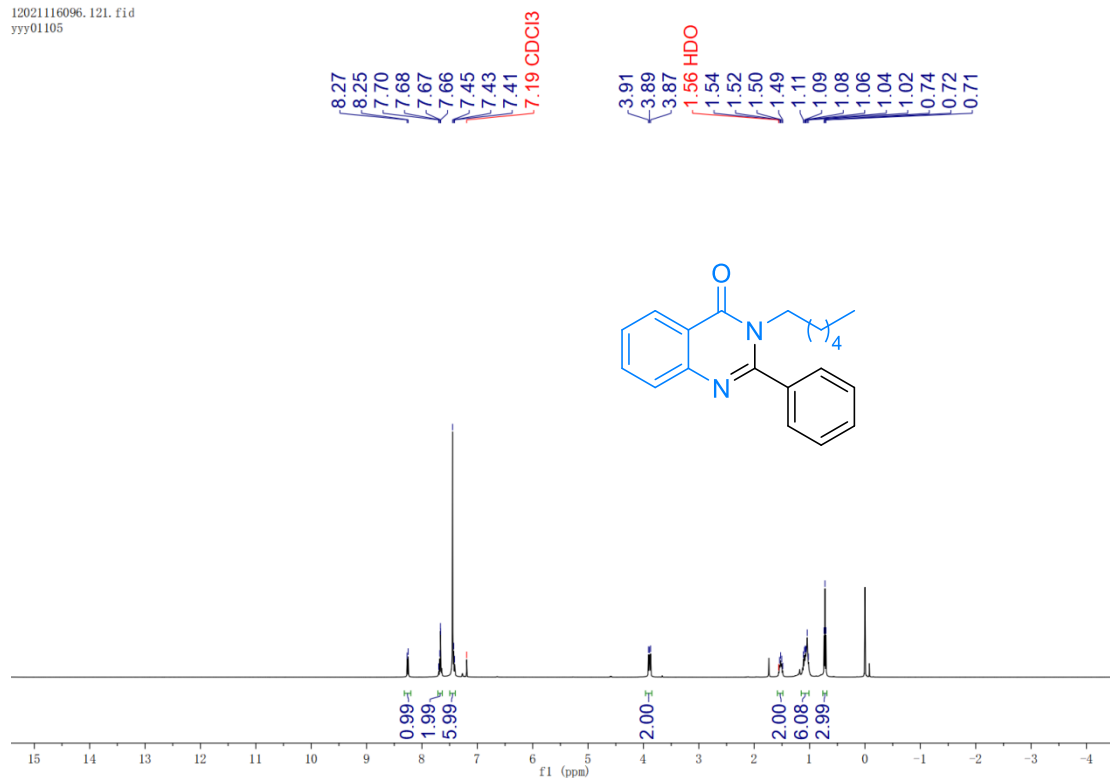

### **<sup>1</sup>H-NMR (400 MHz, Chloroform-*d*) Spectra of compound 7e**

12021116096.122.fid  
yyy01105

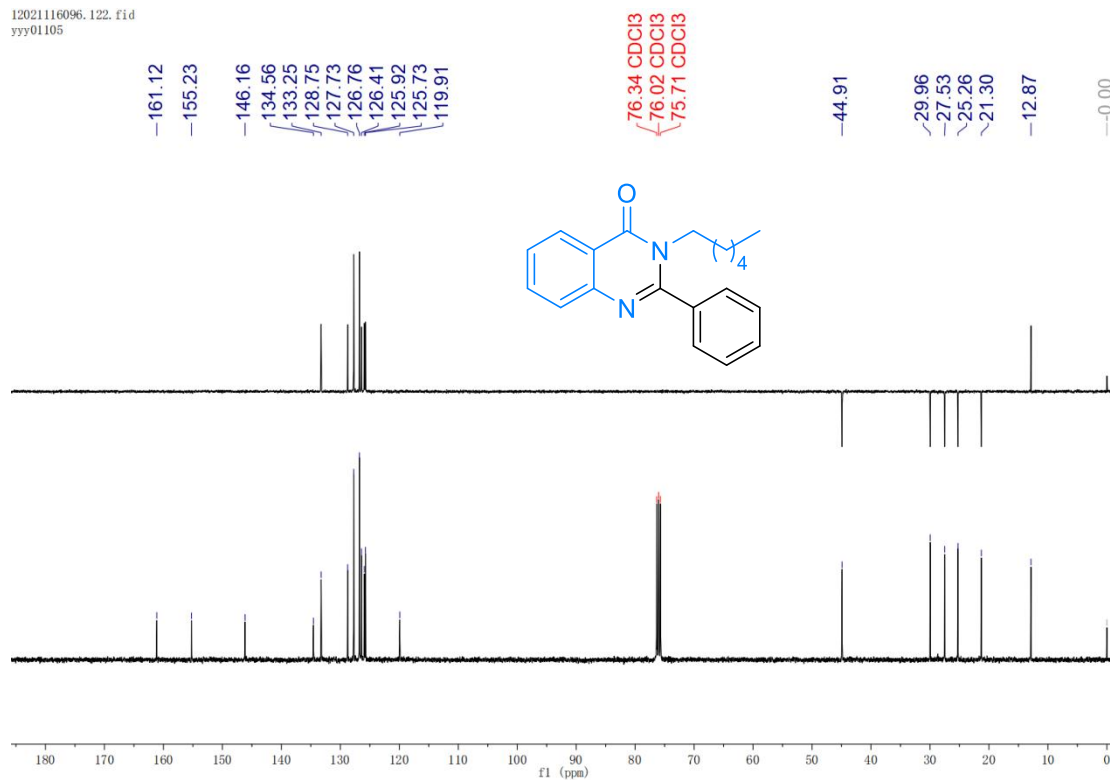

### **<sup>13</sup>C-NMR (100 MHz, Chloroform-*d*) Spectra of compound 7e**

12021116096.13.fid  
yyy01136

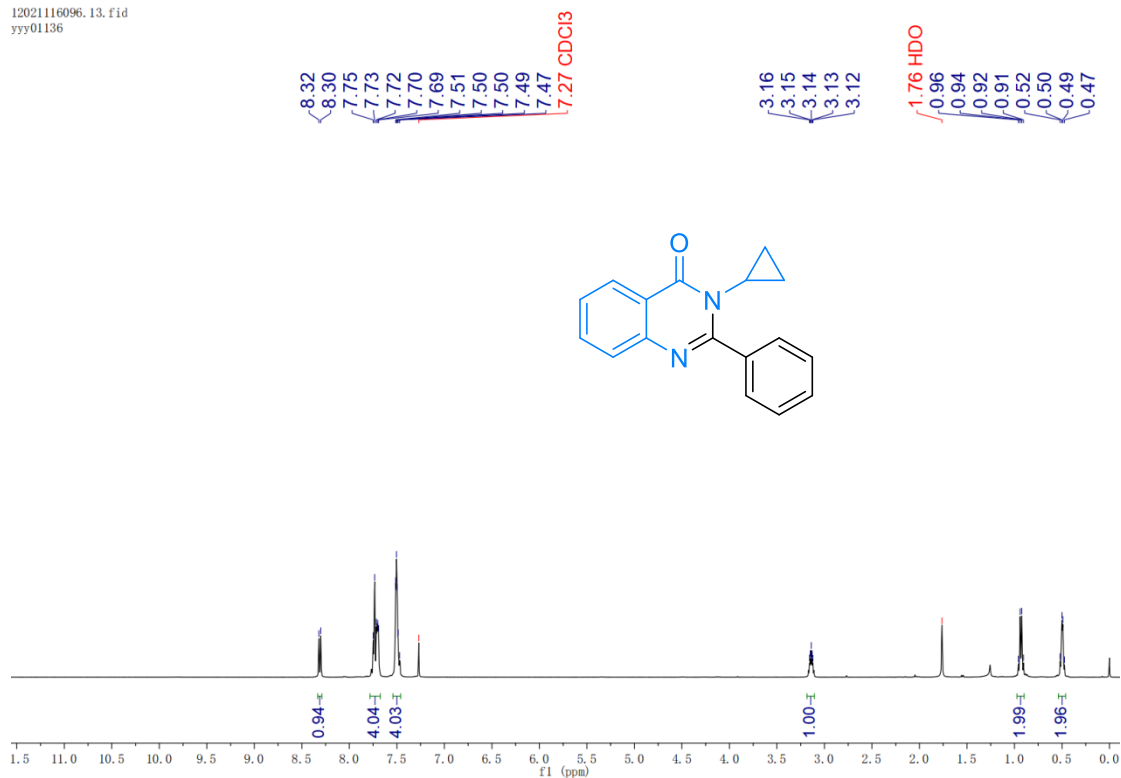

### <sup>1</sup>H-NMR (400 MHz, Chloroform-*d*) Spectra of compound 7f

12021116096.14.fid  
yyy01136

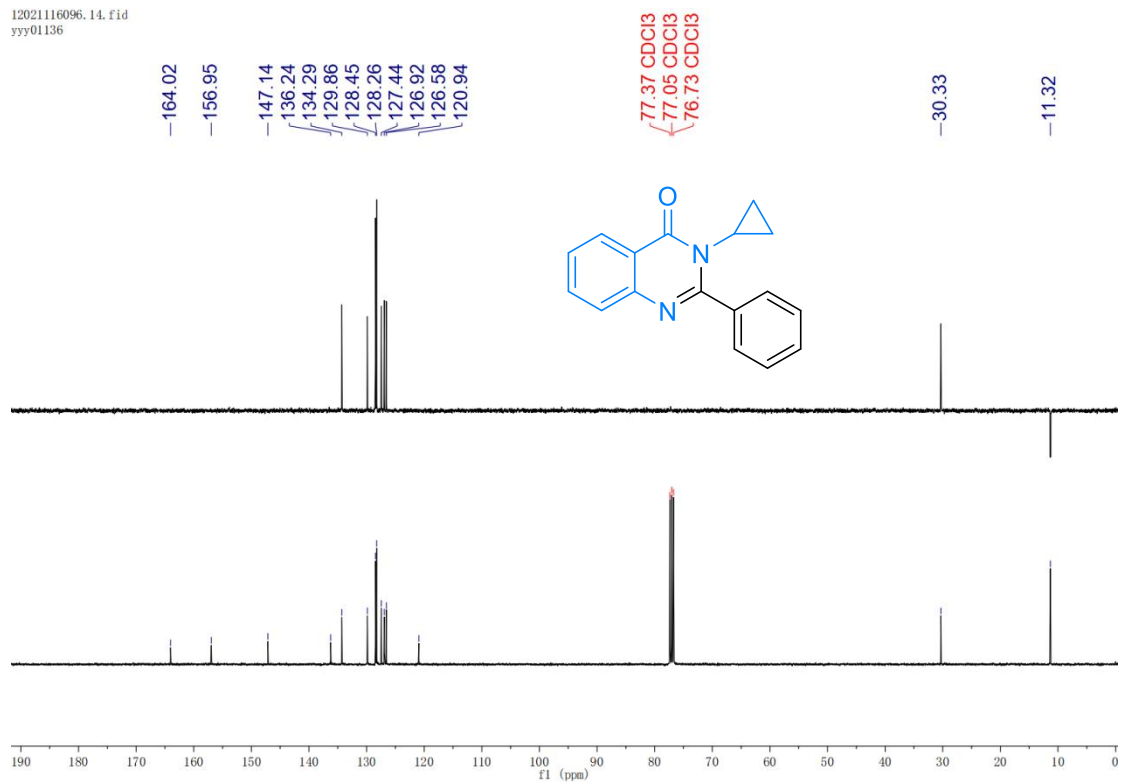

### <sup>13</sup>C-NMR (100 MHz, Chloroform-*d*) Spectra of compound 7f

12021116096.10.fid  
yyy01084

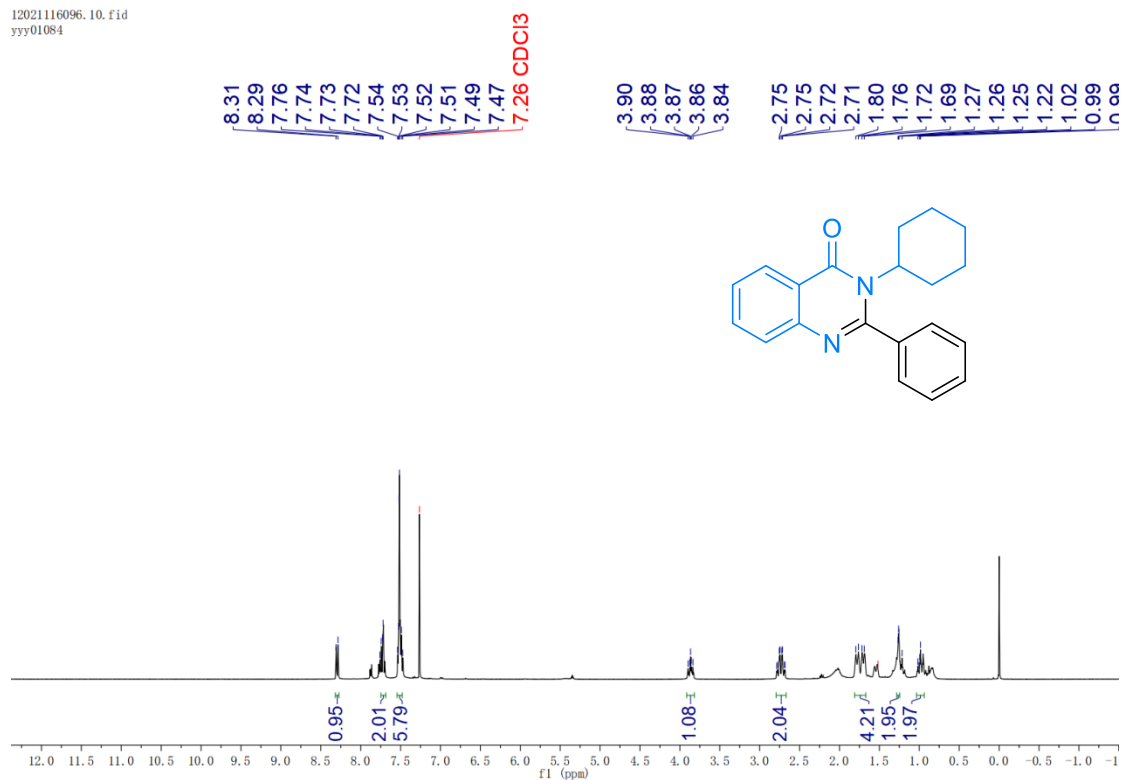

### <sup>1</sup>H-NMR (400 MHz, Chloroform-*d*) Spectra of compound 7g

12021116096.11.fid  
yyy01084

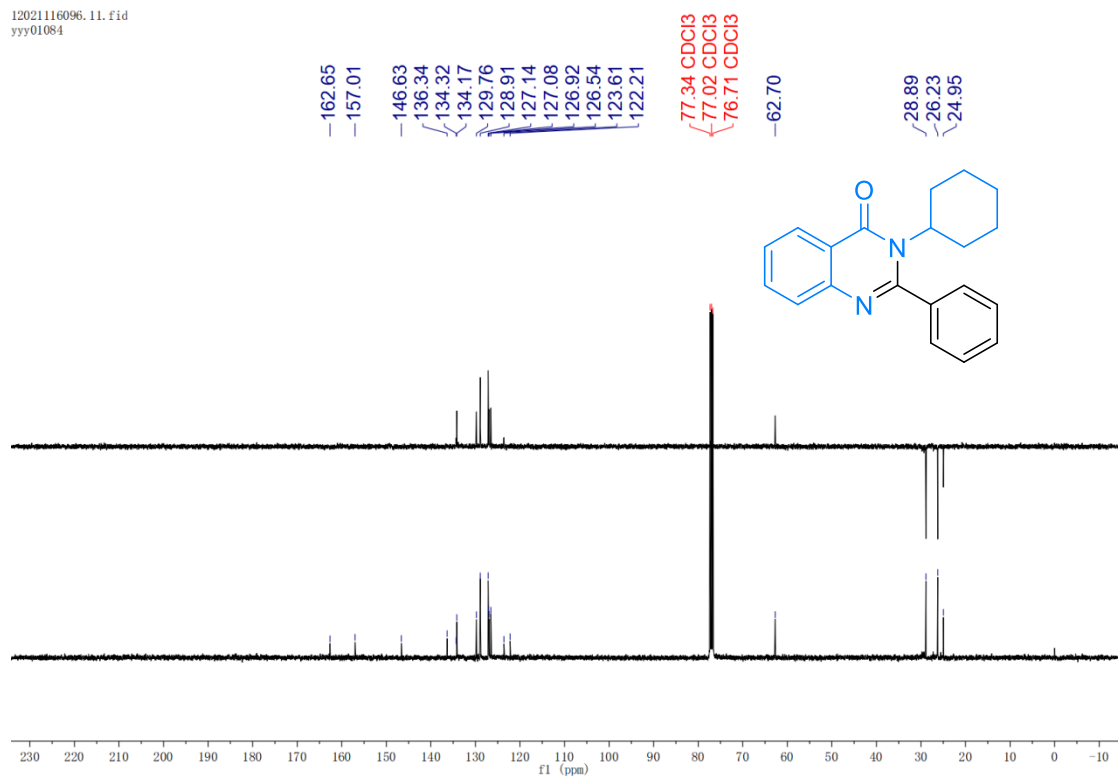

### <sup>13</sup>C-NMR (100 MHz, Chloroform-*d*) Spectra of compound 7g

12021116096.73.fid  
yyy01090-2

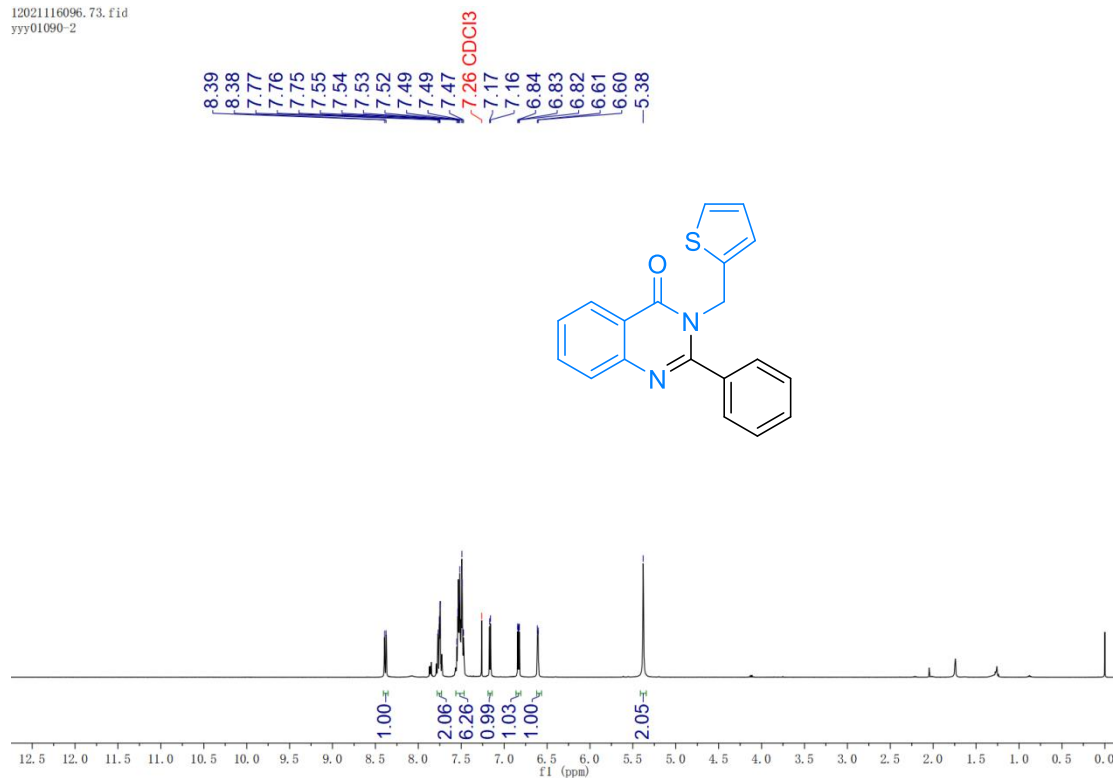

### <sup>1</sup>H-NMR (400 MHz, Chloroform-*d*) Spectra of compound 7h

12021116096.74.fid  
yyy01090-2

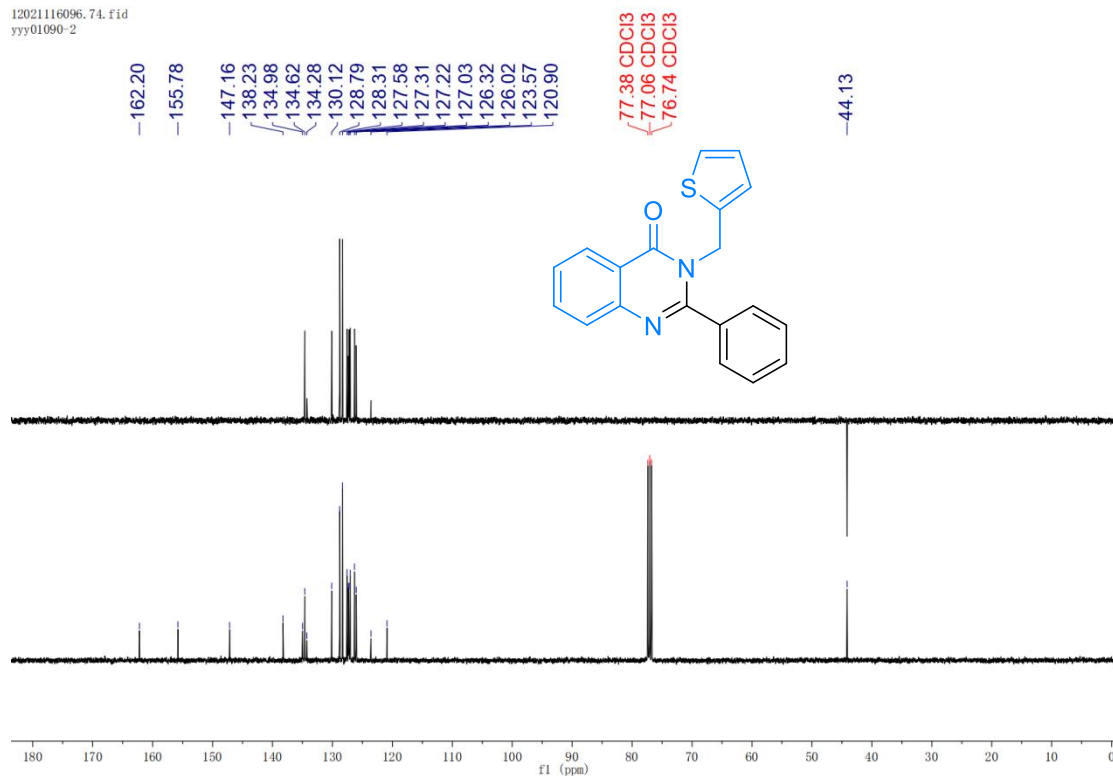

### <sup>13</sup>C-NMR (100 MHz, Chloroform-*d*) Spectra of compound 7h

12021116096.4.fid  
yyy01054

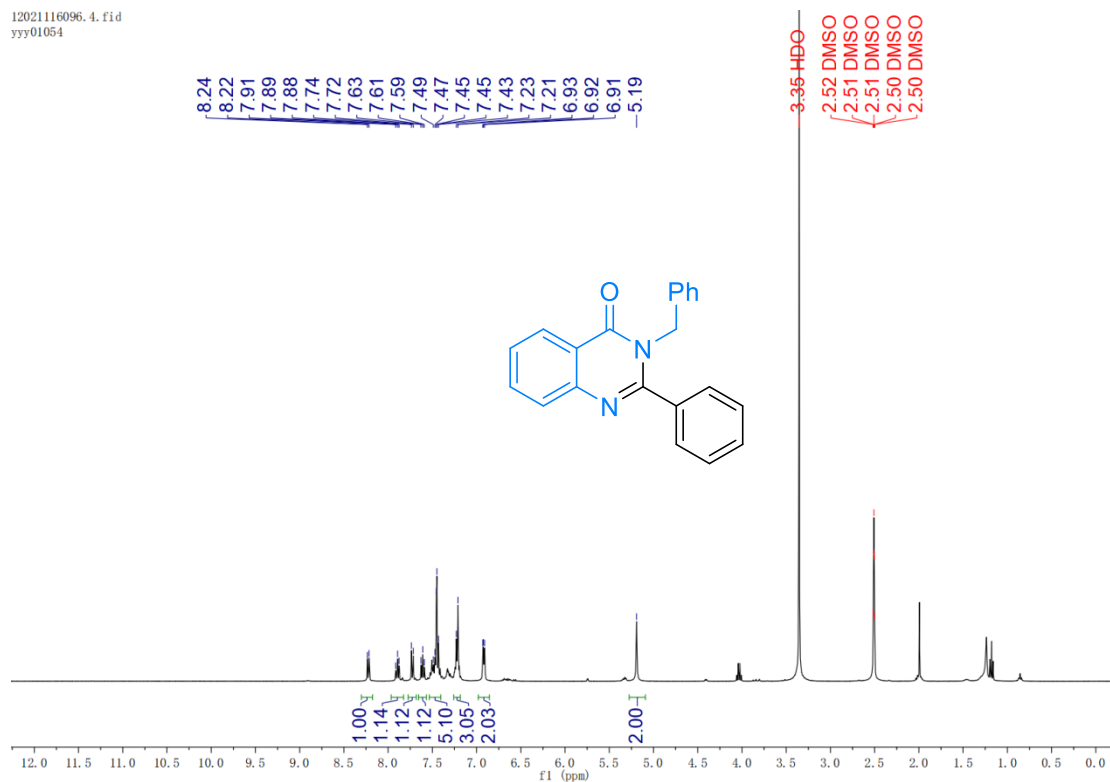

### <sup>1</sup>H-NMR (400 MHz, DMSO-*d*<sub>6</sub>) Spectra of compound 7i

12021116096.5.fid  
yyy01054

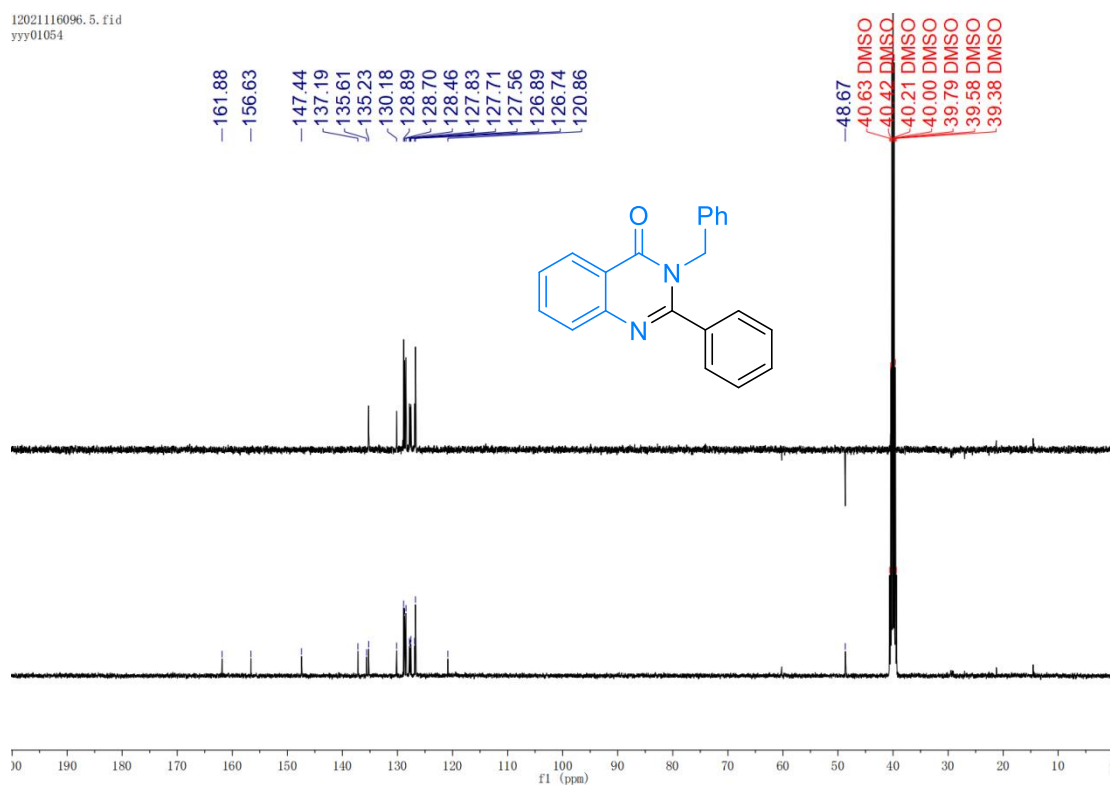

### <sup>13</sup>C-NMR (100 MHz, DMSO-*d*<sub>6</sub>) Spectra of compound 7i

12021116096.94.fid  
yyy01103

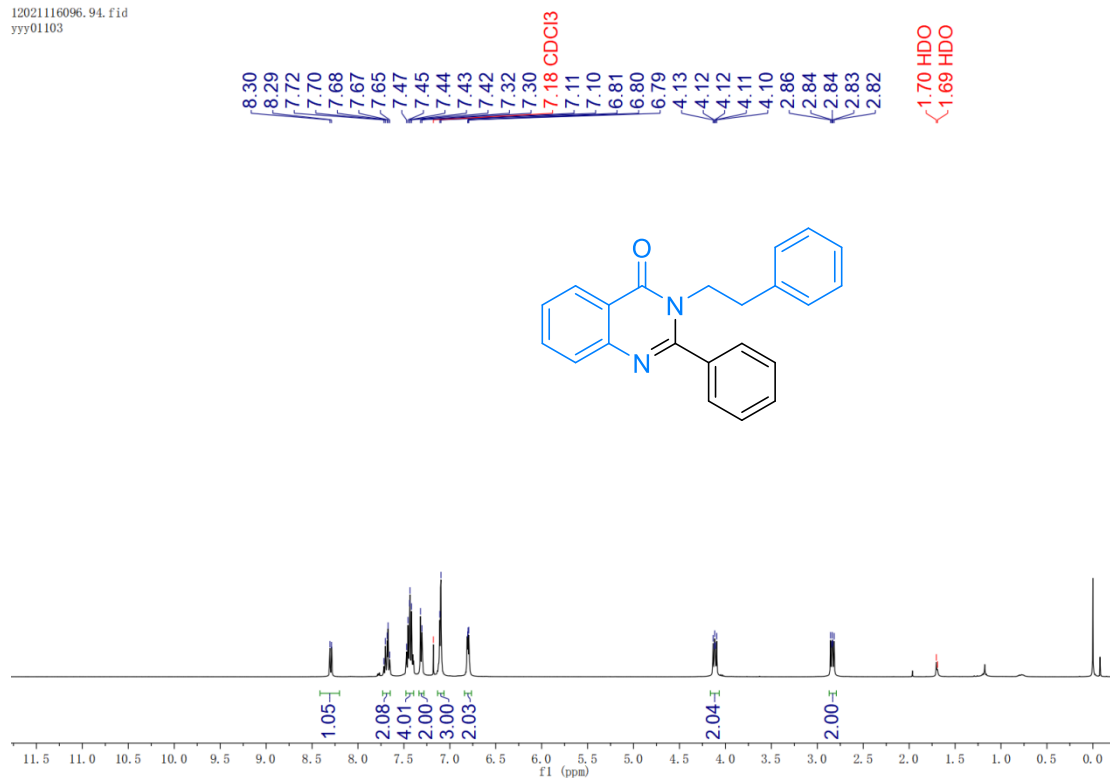

### <sup>1</sup>H-NMR (400 MHz, Chloroform-*d*) Spectra of compound 7j

12021116096.95.fid  
yyy01103

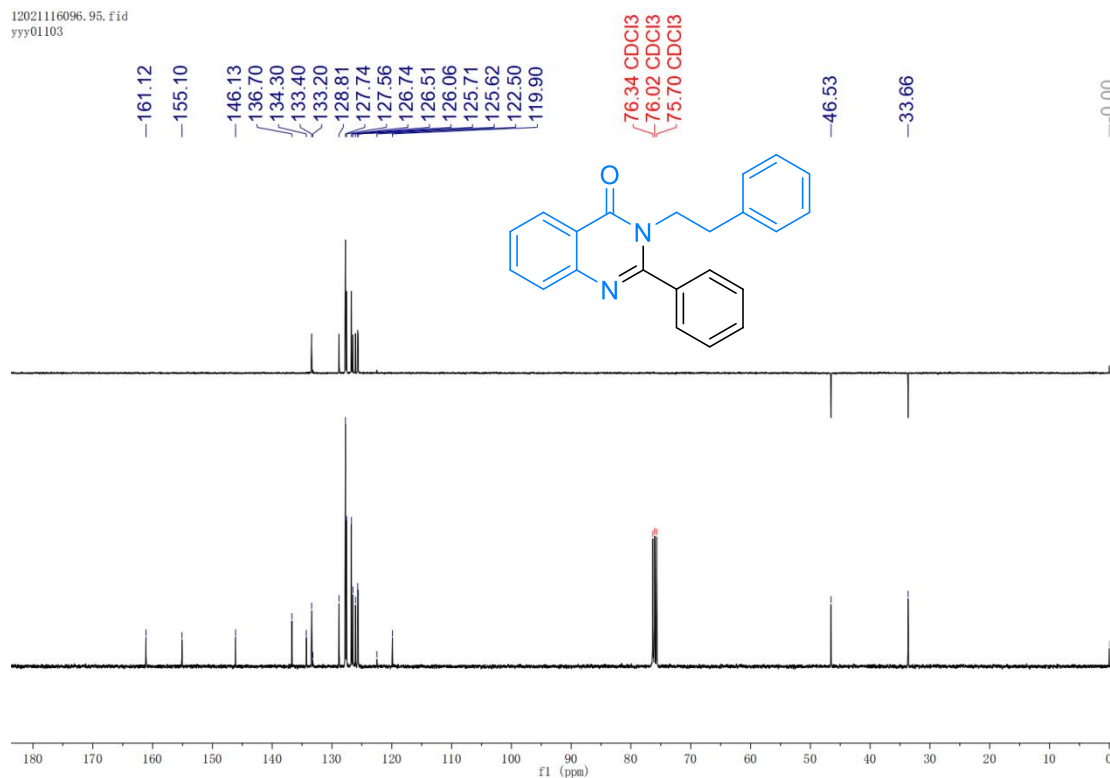

### <sup>13</sup>C-NMR (100 MHz, Chloroform-*d*) Spectra of compound 7j



12021116096.16.fid  
yyy01138

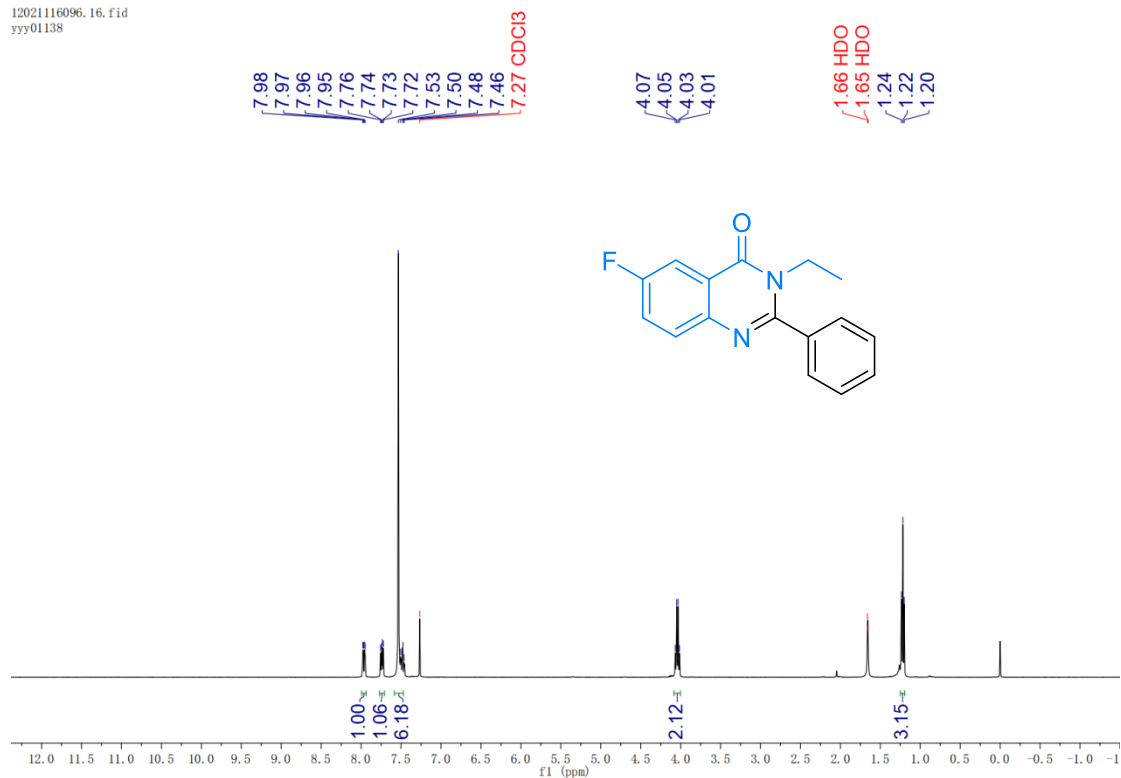

### <sup>1</sup>H-NMR (400 MHz, Chloroform-*d*) Spectra of compound 7k

12021116096.18.fid  
yyy01138

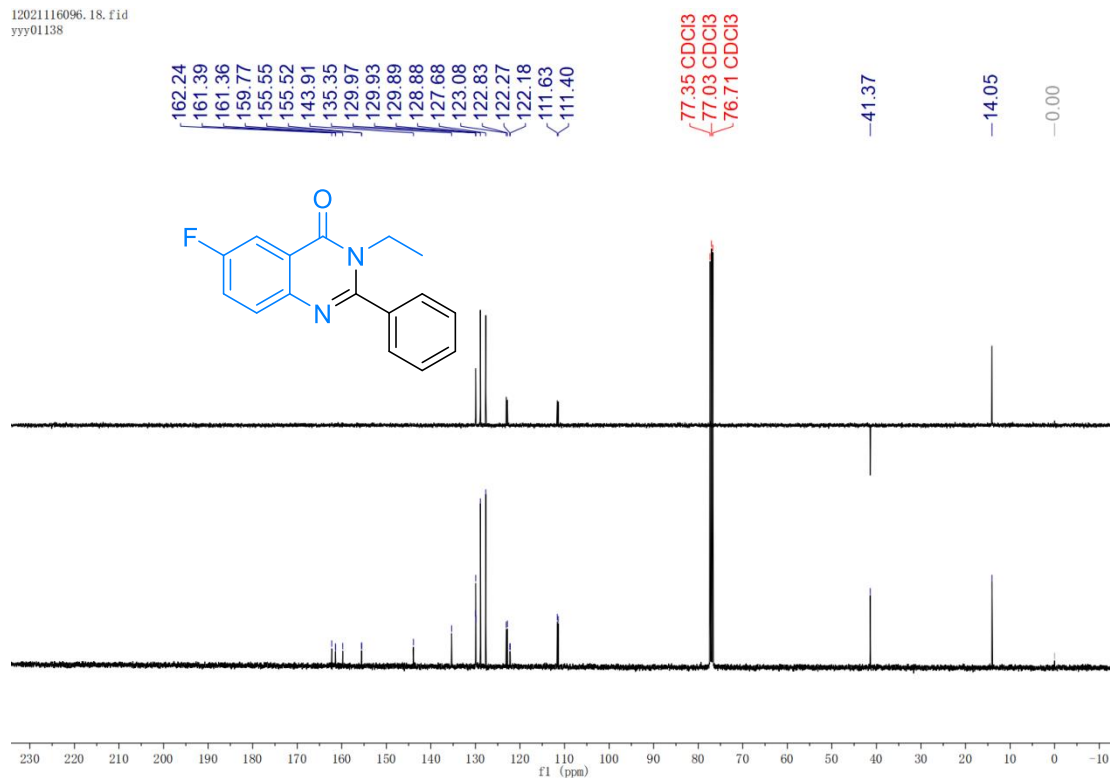

### <sup>13</sup>C-NMR (100 MHz, Chloroform-*d*) Spectra of compound 7k

12021116096.17.fid  
yyy01138

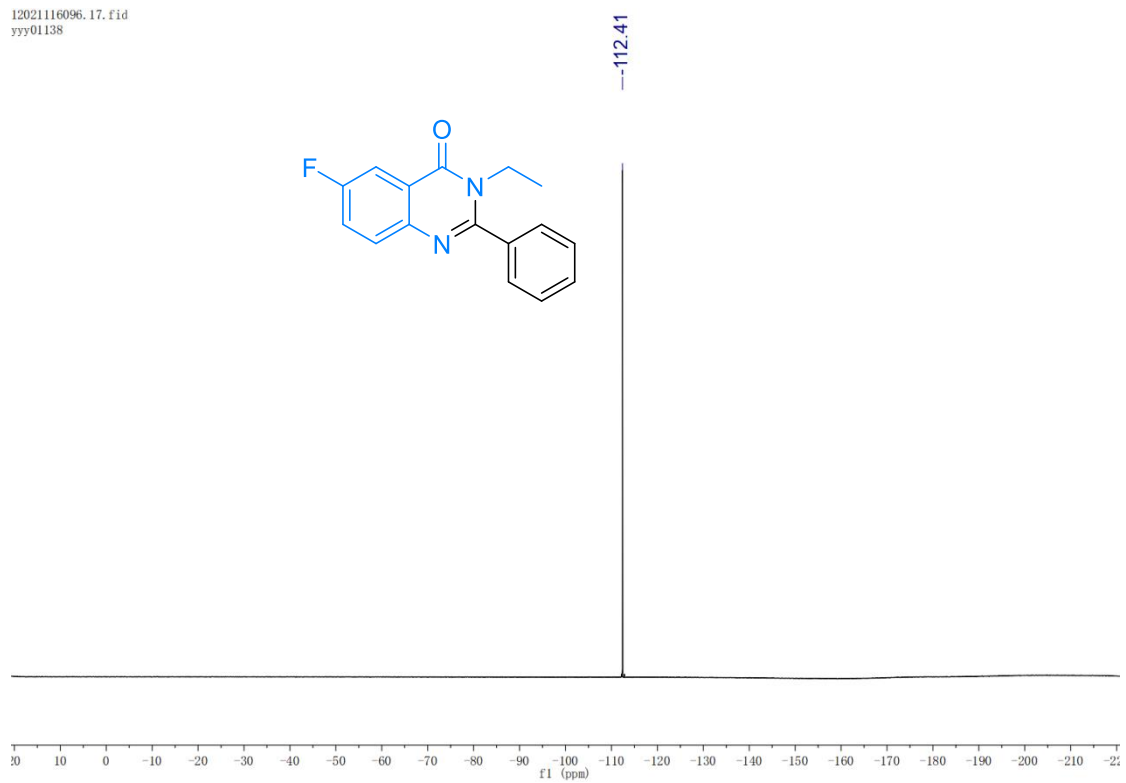

**$^{19}\text{F}$  NMR (376 MHz, Chloroform-*d*) Spectra of compound 7k**

12021116096.26.fid  
yyy01150

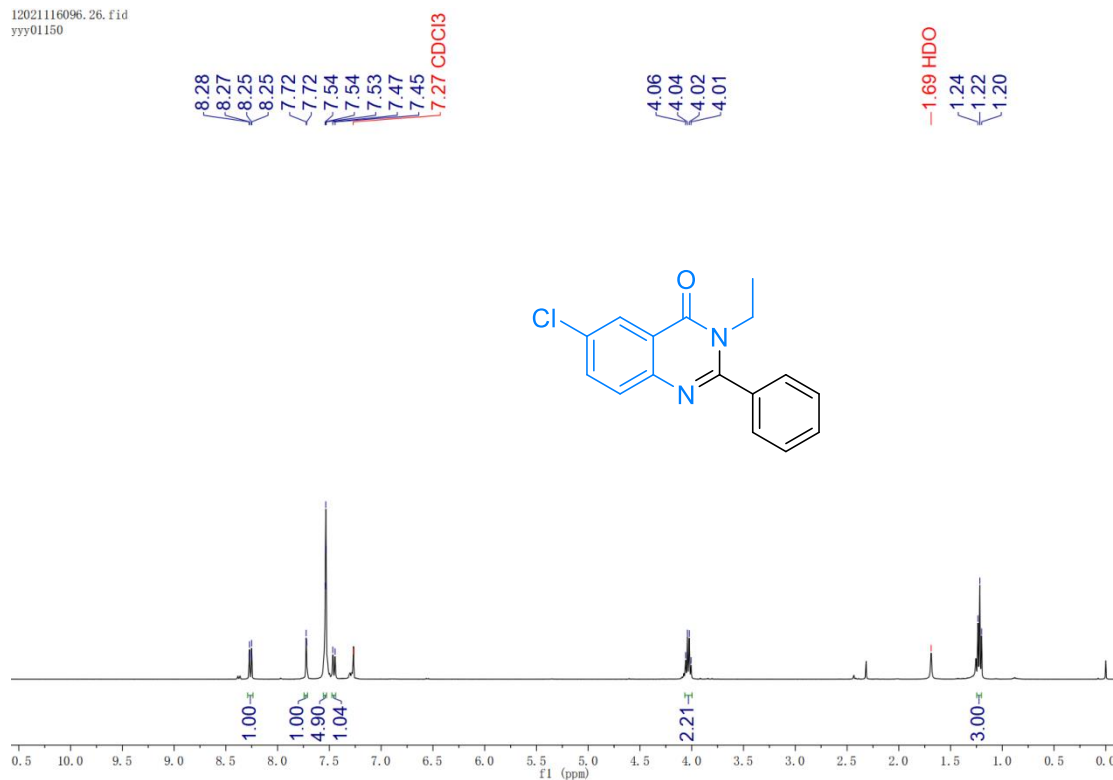

### <sup>1</sup>H-NMR (400 MHz, Chloroform-*d*) Spectra of compound 71

12021116096.27.fid  
yyy01150

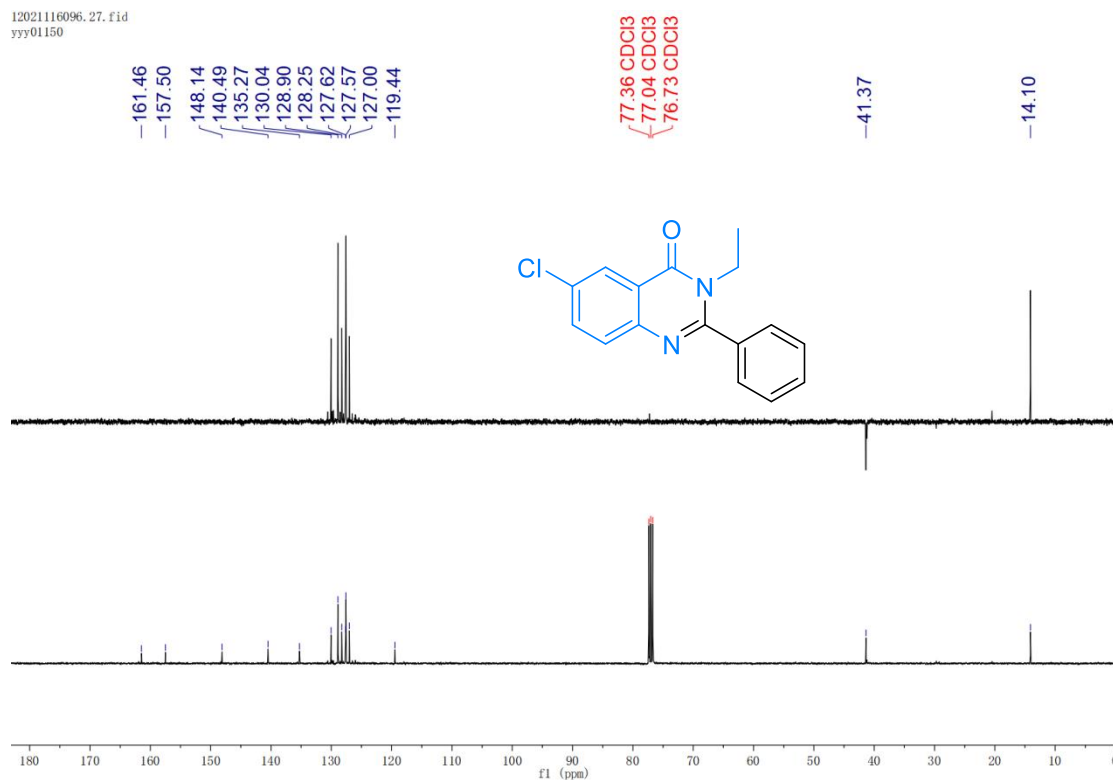

### <sup>13</sup>C-NMR (100 MHz, Chloroform-*d*) Spectra of compound 71

12021116096.103.fid  
yyy01151

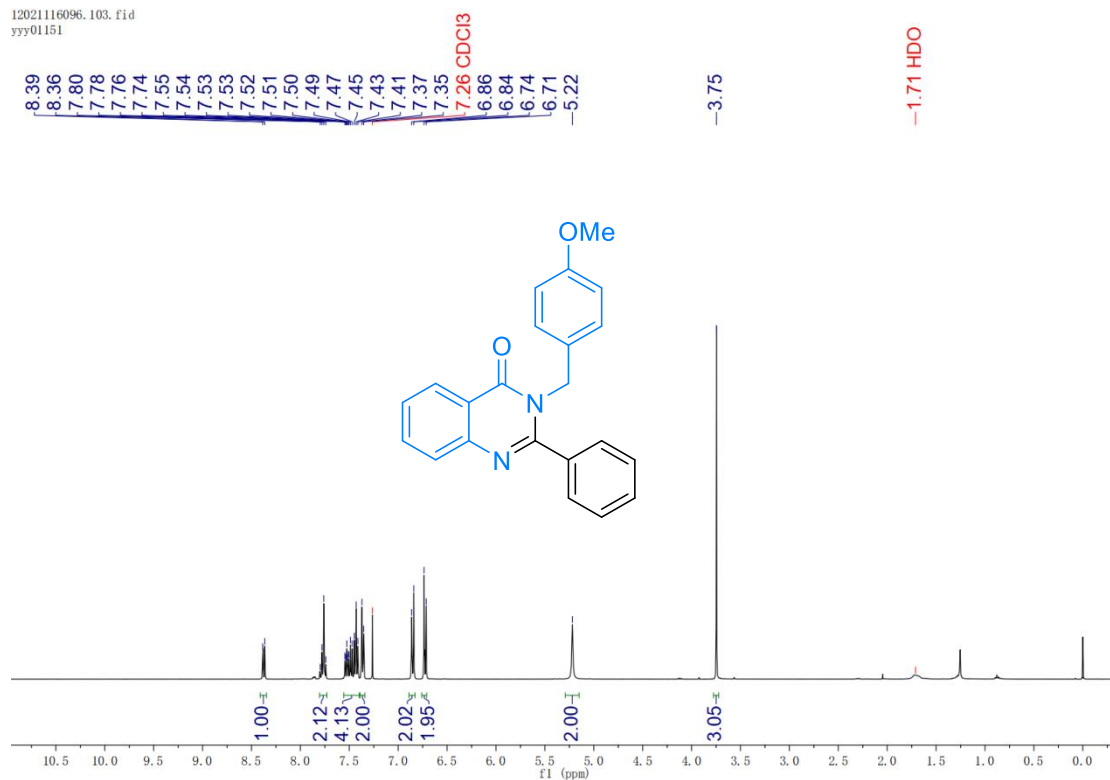

### <sup>1</sup>H-NMR (400 MHz, Chloroform-*d*) Spectra of compound 7m

12021116096.104.fid  
yyy01151

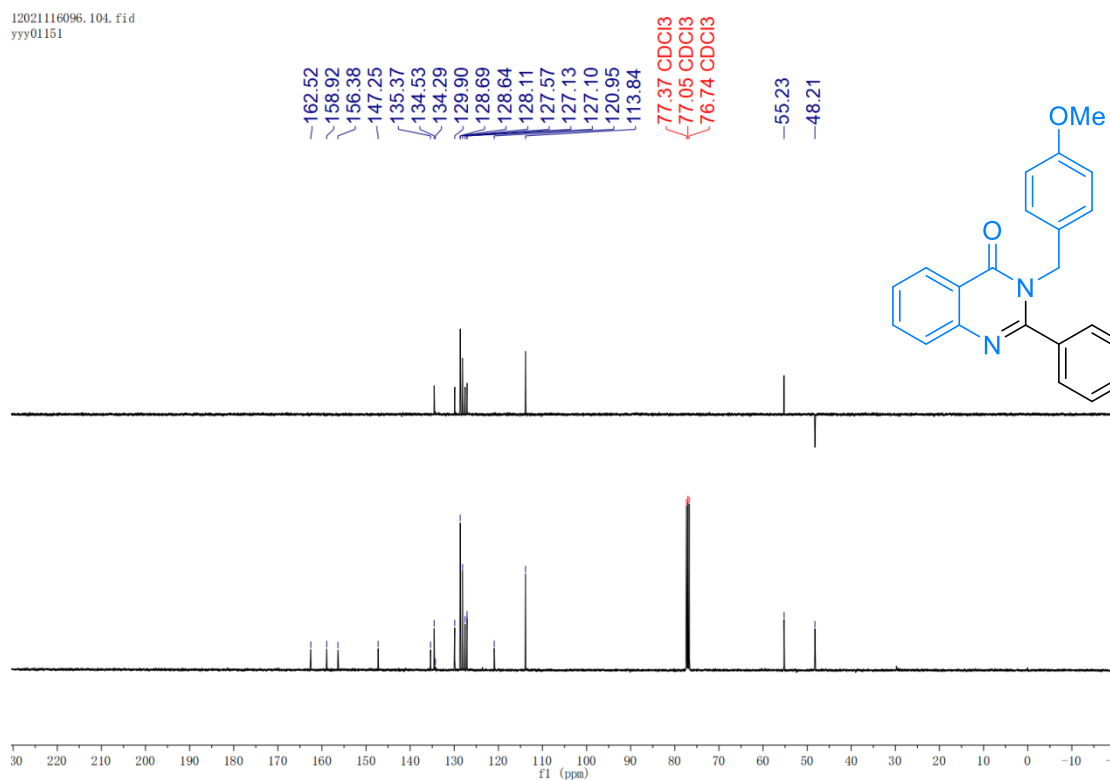

### <sup>13</sup>C-NMR (100 MHz, Chloroform-*d*) Spectra of compound 7m

12021116096.97.fid  
yyy01104

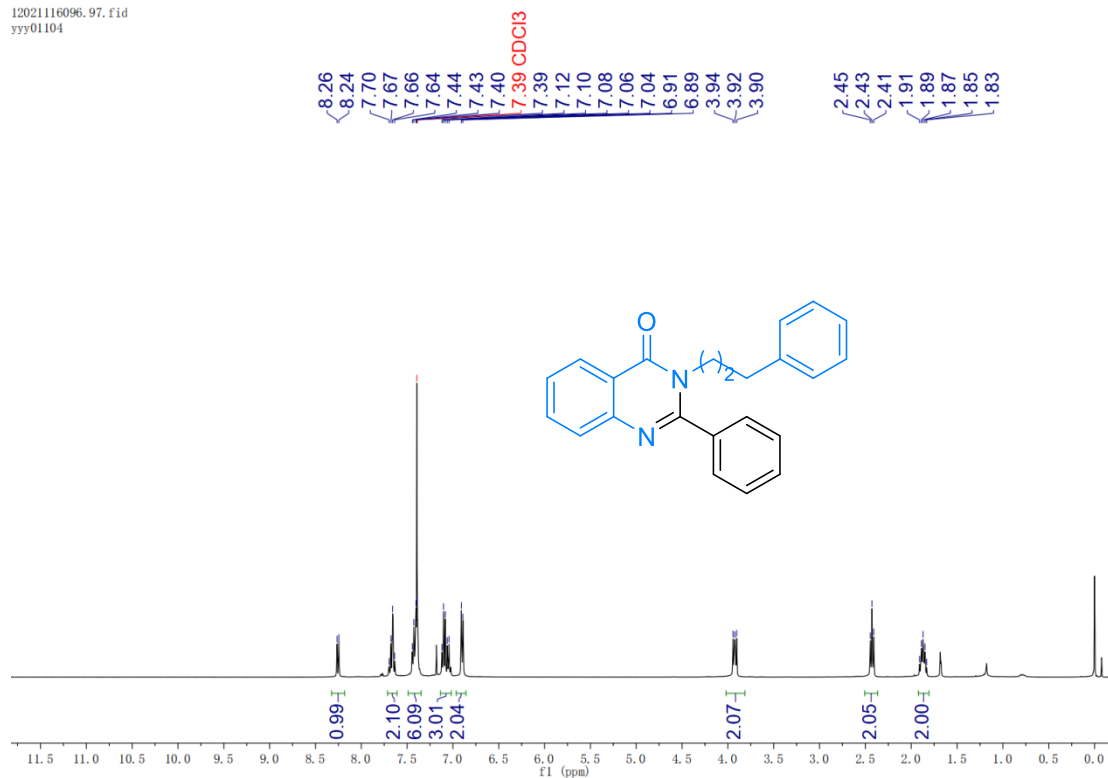

### <sup>1</sup>H-NMR (400 MHz, Chloroform-*d*) Spectra of compound 7n

12021116096.98.fid  
yyy01104

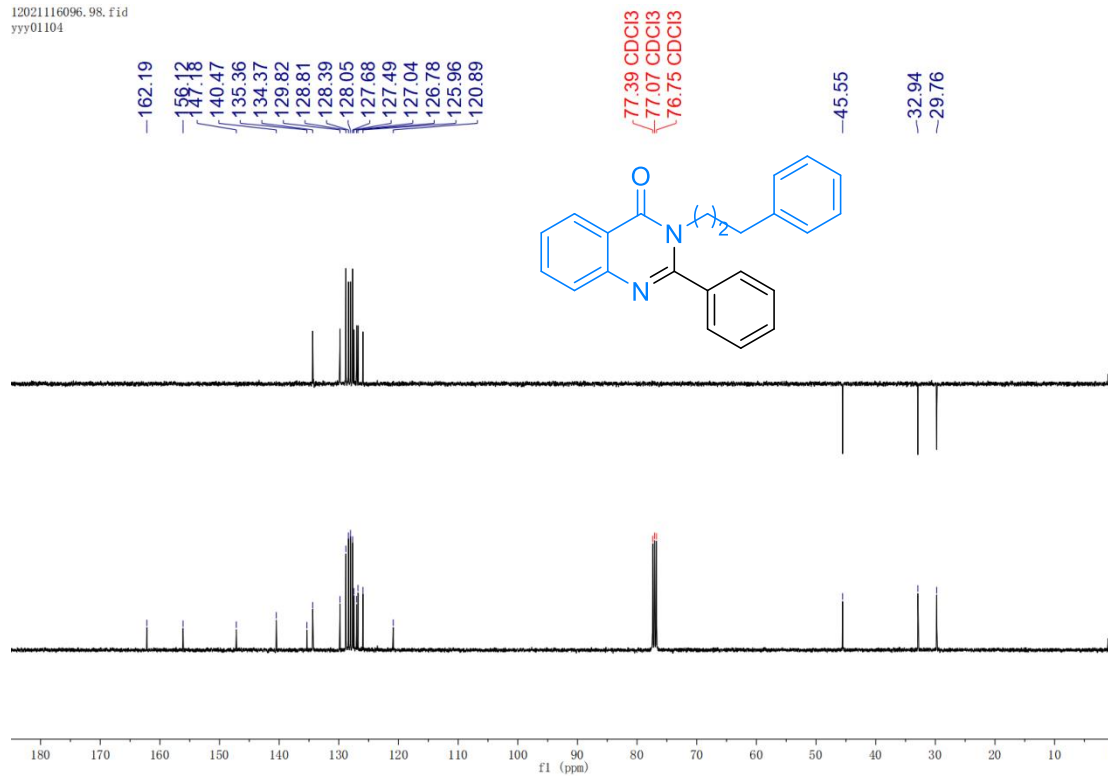

### <sup>13</sup>C-NMR (100 MHz, Chloroform-*d*) Spectra of compound 7n

12021116096.158.fid  
yyy01266

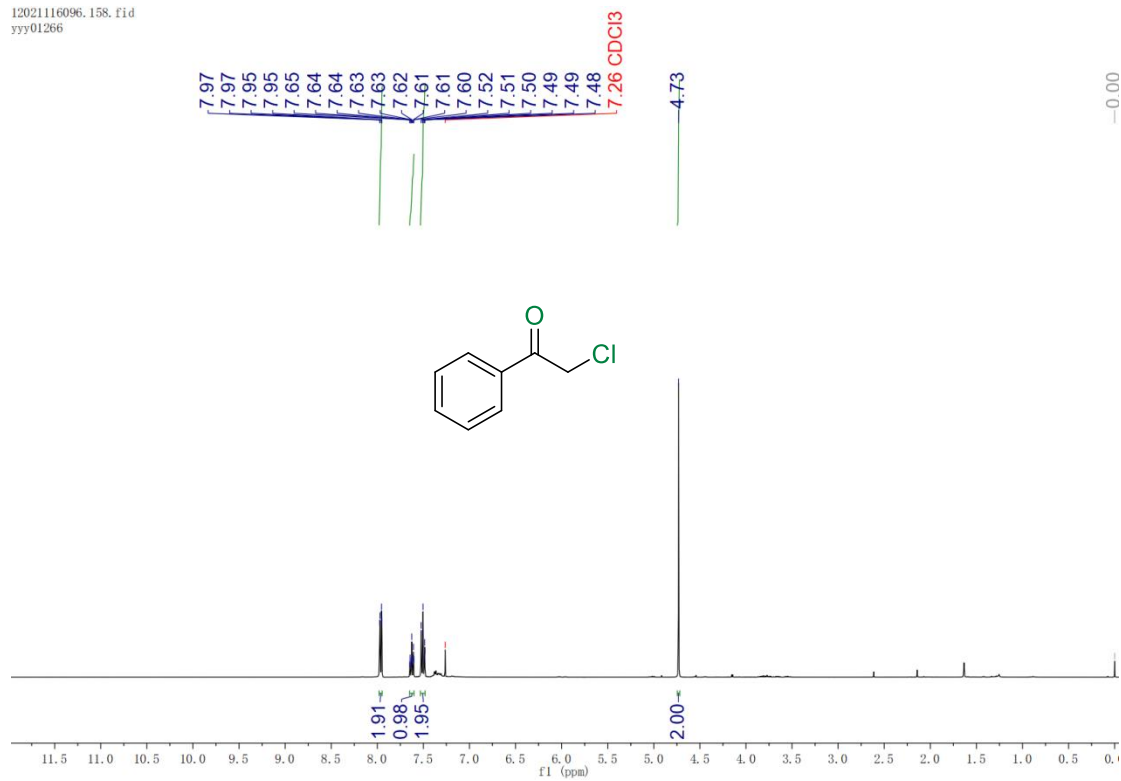

### <sup>1</sup>H-NMR (400 MHz, Chloroform-*d*) Spectra of 9

12021116096.159.fid  
yyy01266

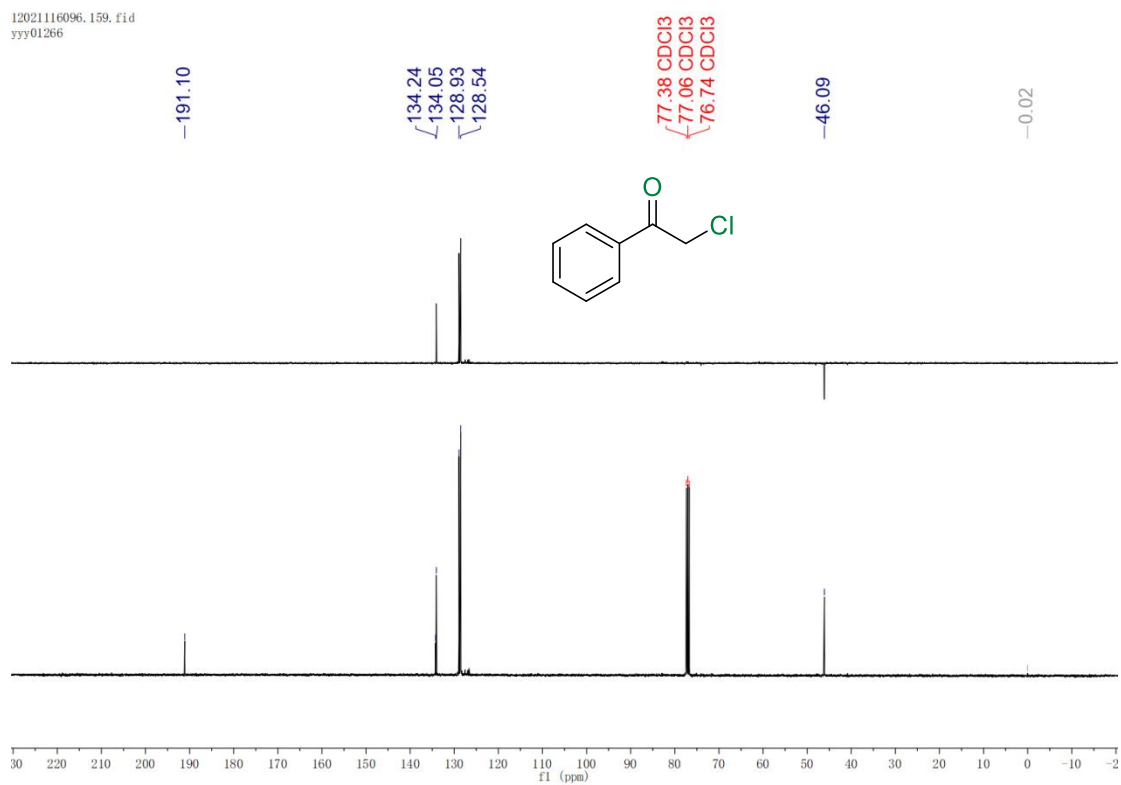

### <sup>13</sup>C-NMR (100 MHz, Chloroform-*d*) Spectra of 9

12021116096.311.fid  
yyy02075

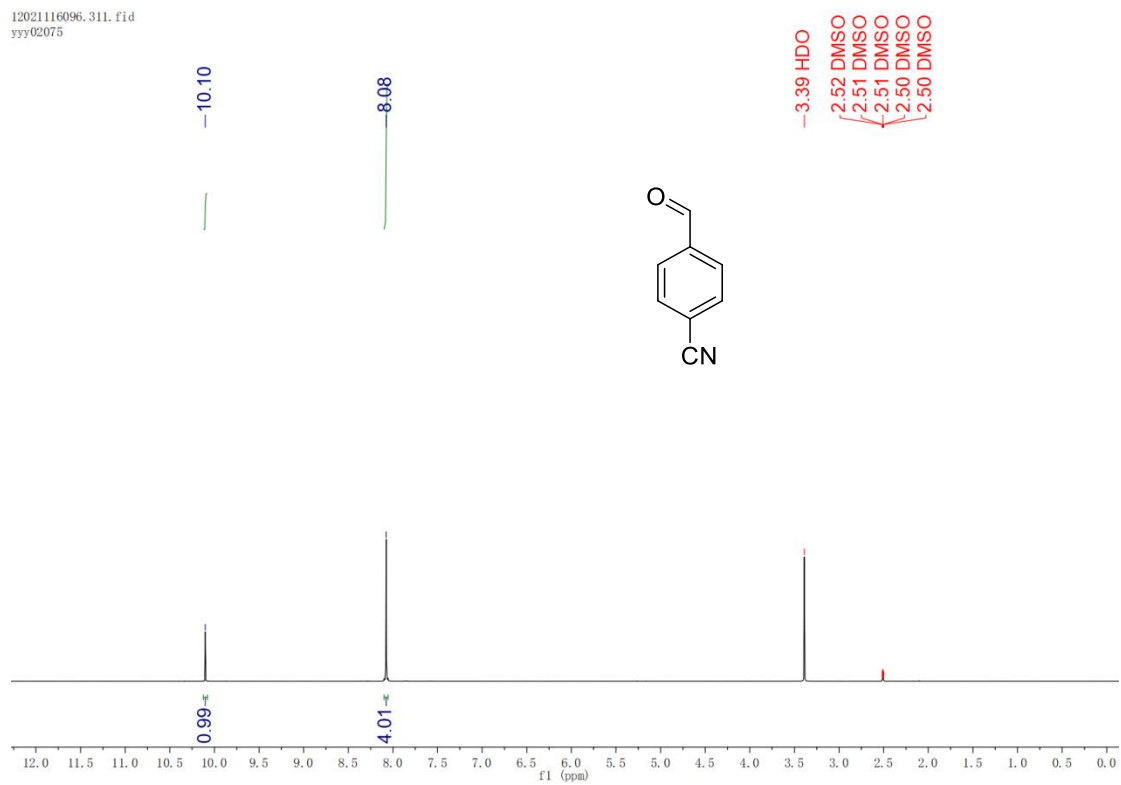

**<sup>1</sup>H-NMR (400 MHz, DMSO-*d*<sub>6</sub>) Spectra of 4-formylbenzonitrile**

12021116096.340.fid  
yyy02127-1

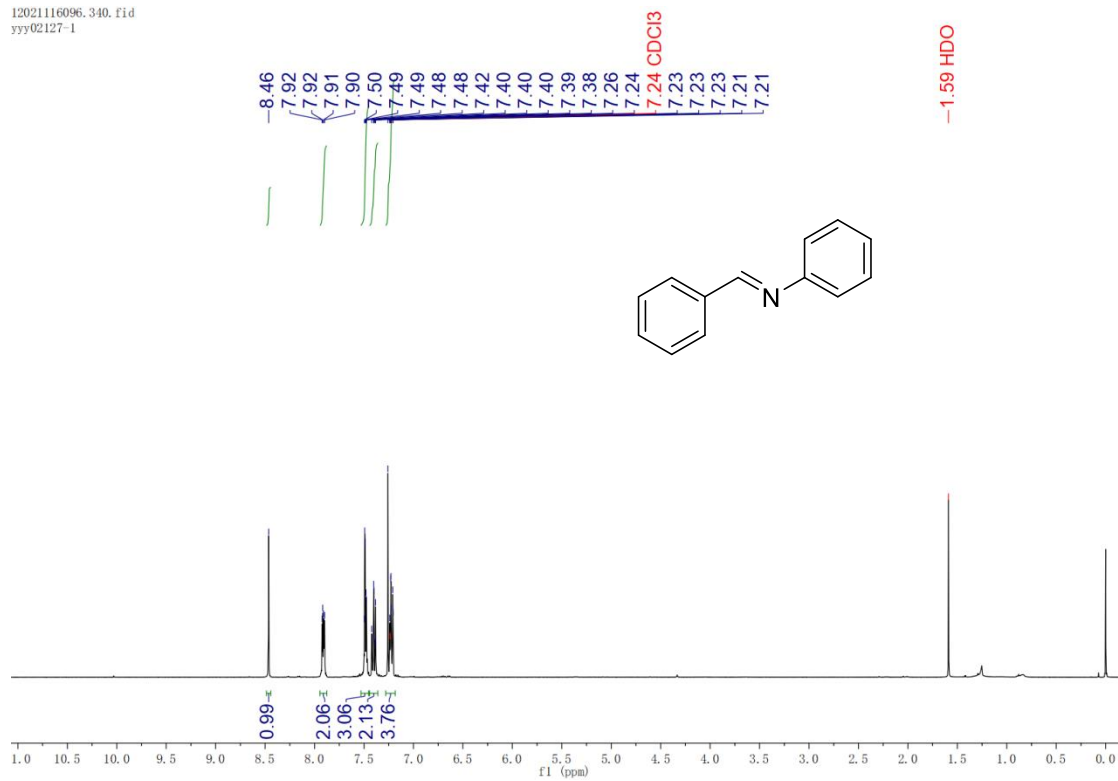

### <sup>1</sup>H-NMR (400 MHz, Chloroform-*d*) Spectra of **11**

12021116096.341.fid  
yyy02127-1

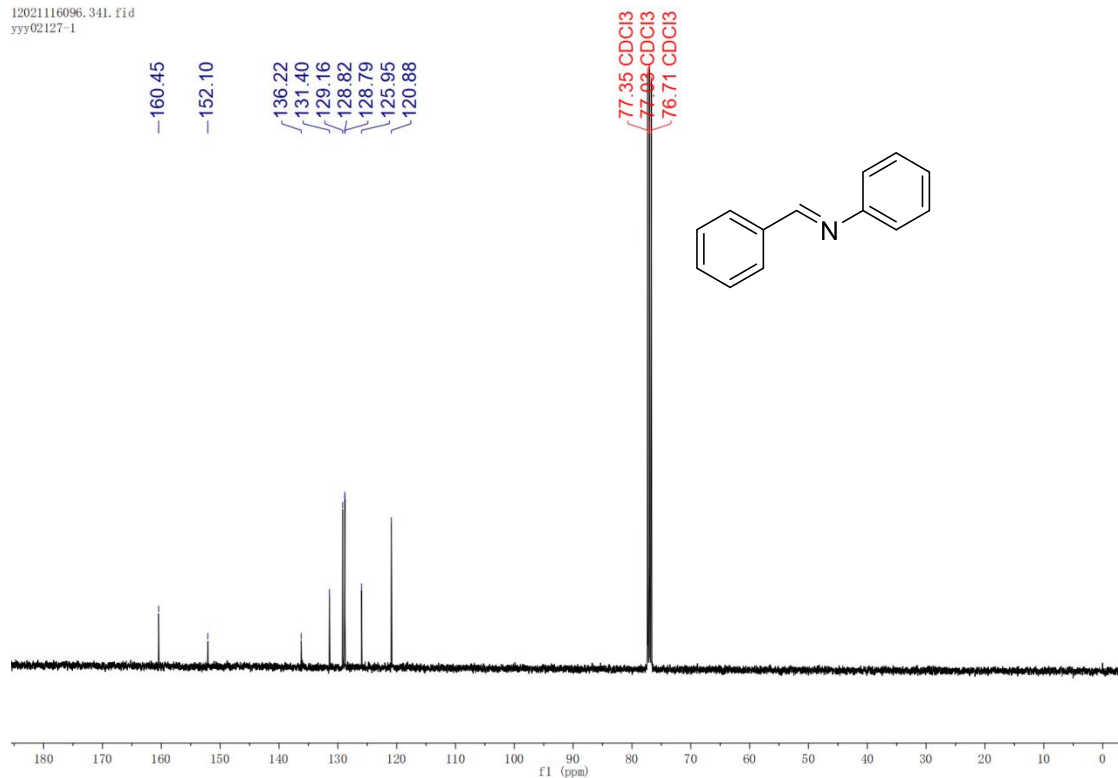

### <sup>13</sup>C-NMR (100 MHz, Chloroform-*d*) Spectra of **11**



## 7 References

1. Jang Y, Lee S B, Hong J, et al. Synthesis of 2-aryl quinazolinones via iron-catalyzed cross-dehydrogenative coupling (CDC) between N–H and C–H bonds[J]. *Org. Biomol. Chem.* **2020**, *18*(28): 5435-5441.
2. Mahdavi M, Pedrood K, Safavi M, et al. Synthesis and anticancer activity of N-substituted 2-arylquinazolinones bearing trans-stilbene scaffold[J]. *Eur. J. Med. Chem.* **2015**, *95*: 492-499.
3. Reddy M B. Visible-light induced copper (i)-catalyzed oxidative cyclization of o-aminobenzamides with methanol and ethanol via HAT[J]. *Org. Biomol. Chem.* **2020**, *18*(47): 9601-9605.
4. Tang, J.-J.; Yu, X.; Yamamoto, Y.; Bao, M., Visible-Light-Promoted Iron-Catalyzed N-Arylation of Dioxazolones with Arylboronic Acids. *ACS Catal.* **2021**, *11*, 13955-13961.
5. Wang Y, Zhu D, Tang L, et al. Highly efficient amide synthesis from alcohols and amines by virtue of a water-soluble gold/DNA catalyst[J]. *Angew. Chem. Int. Ed.* **2011**, *123*(38): 9079-9083.
6. Nguyen H D, Tran T V, Taylor C R, et al. 2-Azaaryl-1-methylpyridinium Halides: Aqueous-Soluble Activating Reagents for Efficient Amide Coupling in Water[J]. *Acs Sustainable Chem. Eng.* **2022**, *10*(39): 12968-12974.
7. Feng, B.; Yang, Y.; You, J. A Methylation Platform of Unconventional Inert Aryl Electrophiles: Trimethylboroxine as a Universal Methylating Reagent. *Chem. Sci.* **2020**, *11*, 6031–6035.
8. Guo Z, Liu Q, Wei X, et al. 2-Aminopyrrolyl dilithium compounds: Synthesis, structural diversity, and catalytic activity for amidation of aldehydes with amines[J]. *Organometallics.* **2013**, *32*(16): 4677-4683.
9. Zhou Z, Kweon J, Jung H, et al. Photoinduced Transition-Metal-Free Chan–Evans–Lam-Type Coupling: Dual Photoexcitation Mode with Halide Anion Effect[J]. *J Am Chem Soc.* **2022**, *144*(20): 9161-9171.
10. Ben Halima T, Vandavasi J K, Shkoor M, et al. A cross-coupling approach to amide bond formation from esters[J]. *ACS Catal.* **2017**, *7*(3): 2176-2180.
11. Shugrue C R, DeFrancisco J R, Metrano A J, et al. Detection of weak hydrogen bonding to fluoro and nitro groups in solution using H/D exchange[J]. *Org. Biomol. Chem.* **2016**, *14*(7): 2223-2227.
12. Hong W P, Tran V H, Kim H K. Practical one-pot amidation of N-Alloc-, N-Boc-, and N-Cbz protected amines under mild conditions[J]. *RSC Adv.* **2021**, *11*(26): 15890-15895.
13. Zhu Y P, Sergeev S, Franck P, et al. Amine activation: Synthesis of N-(hetero) arylamides from isothioureas and carboxylic acids[J]. *Org. Lett.* **2016**, *18*(18): 4602-4605.
14. Molander G A, Hiebel M A. Synthesis of amidomethyltrifluoroborates and their use in cross-coupling reactions[J]. *Org. Lett.* **2010**, *12*(21): 4876-4879.
15. Rossi S A, Shimkin K W, Xu Q, et al. Selective formation of secondary amides via the copper-catalyzed cross-coupling of alkylboronic acids with primary amides[J]. *Org. Lett.* **2013**, *15*(9): 2314-2317.
16. Ibrahim, M. B.; Suleiman, R.; Fettouhi, M.; El Ali, B., A palladium–bisoxazoline supported catalyst for selective synthesis of aryl esters and aryl amides via carbonylative coupling reactions. *RSC Adv.* **2016**, *6*, 78826-78837.

17. Yamada K, Kota M, Takahashi K, et al. Development of triazinone-based condensing reagents for amide formation[J]. *J. Org. Chem.* **2019**, *84*(23): 15042-15051.
18. Zhang R, Yao W Z, Qian L, et al. A practical and sustainable protocol for direct amidation of unactivated esters under transition-metal-free and solvent-free conditions[J]. *Green Chem.* **2021**, *23*(11): 3972-3982.
19. Li J, Subramaniam K, Smith D, et al. AlMe<sub>3</sub>-promoted formation of amides from acids and amines[J]. *Org. Lett.* **2012**, *14*(1): 214-217.
20. Liu Y, Achtenhagen M, Liu R, et al. Transamidation of N-acyl-glutarimides with amines[J]. *Org. Biomol. Chem.* **2018**, *16*(8): 1322-1329.
21. Laha J K, Patel K V, Tummalapalli K S S, et al. Formation of amides, their intramolecular reactions for the synthesis of N-heterocycles, and preparation of a marketed drug, sildenafil: a comprehensive coverage[J]. *Chem Commun.* **2016**, *52*(67): 10245-10248.
22. Das S, Sinha S, Samanta D, et al. Metal – ligand cooperative approach to achieve dehydrogenative functionalization of alcohols to quinolines and quinazolin-4 (3 H)-ones under mild aerobic conditions[J]. *J. Org. Chem.* **2019**, *84*(16): 10160-10171.
23. Sardar B, Jamatia R, Samanta A, et al. Ru Doped Hydrotalcite Catalyzed Borrowing Hydrogen-Mediated N-Alkylation of Benzamides, Sulfonamides, and Dehydrogenative Synthesis of Quinazolinones[J]. *J. Org. Chem.* **2022**, *87*(9): 5556-5567.
24. Zhao R, Wen S, Fu H, et al. Bis (2-methoxyethyl) ether promoted intramolecular acceptorless dehydrogenative coupling to construct structurally diverse quinazolinones by molecular oxygen[J]. *Green Chem.* **2022**, *24*(4): 1644-1649.
25. Feng Y, Li Y, Cheng G, et al. Copper-catalyzed synthesis of 2-arylquinazolinones from 2-arylimidolones with amines or ammoniums[J]. *J. Org. Chem.* **2015**, *80*(14): 7099-7107.
26. Ma, Z.; Song, T.; Yuan, Y.; Yang, Y., Synergistic catalysis on Fe-N x sites and Fe nanoparticles for efficient synthesis of quinolines and quinazolinones via oxidative coupling of amines and aldehydes. *Chem. Sci.* **2019**, *10* (44), 10283-10289.
27. Jo H Y, Lee J M, Pietrasiak E, et al. Generation of N–H Imines from  $\alpha$ -Azidocarboxylic Acids through Ru-Catalyzed Decarboxylation[J]. *J. Org. Chem.* **2021**, *86*(23): 17409-17417.
28. Qian C, Liu K, Tao S W, et al. Palladium-catalyzed oxidative three-component coupling of anthranilamides with isocyanides and arylboronic acids: Access to 2, 3-disubstituted quinazolinones[J]. *J. Org. Chem.* **2018**, *83*(16): 9201-9209.
29. á Subba Rao J, á Venkateswara Rao A. Synthesis of 2-hydroxy-3-alkyl-2-phenyl-2, 3-dihydroquinazolin-4 (1 H)-one via molybdenum hexacarbonyl mediated CO gas-and ligand free carbonylative reactions[J]. *RSC Adv.* **2016**, *6*(72): 67534-67539.
30. Huang J, Chen W, Liang J, et al.  $\alpha$ -Keto acids as triggers and partners for the synthesis of quinazolinones, quinoxalinones, benzoxazinones, and benzothiazoles in water[J]. *J. Org. Chem.* **2021**, *86*(21): 14866-14882.
31. Phakhodee W, Wangngae S, Pattarawarapan M. Approach to the Synthesis of 2, 3-Disubstituted-3 H-quinazolin-4-ones Mediated by Ph<sub>3</sub>P–I<sub>2</sub>[J]. *J. Org. Chem.* **2017**, *82*(15): 8058-8066.
32. Tu J L, Hu A M, Guo L, et al. Iron-Catalyzed C (Sp<sup>3</sup>)–H Borylation, Thiolation, and Sulfinylation Enabled by Photoinduced Ligand-to-Metal Charge Transfer[J]. *J Am Chem Soc.* **2023**, *145*(13): 7600-7611.
33. Dallinger D, Pinho V D, Gutmann B, et al. Laboratory-scale membrane reactor for the

generation of anhydrous diazomethane[J]. *J. Org. Chem.* **2016**, *81*(14): 5814-5823.
